# Supplementary material for: Germline burden of rare damaging variants negatively affects human healthspan and lifespan
Source: eLife. 2020 Apr 7;9:e53449. doi: 10.7554/eLife.53449 (PMC7314550; doi:10.7554/eLife.53449)
Supplement: Figure 1—source data 1. [file elife-53449-fig1-data1.xlsx]

## Sheet: UKBBN
	coef	CI (2.5%)	CI (97.5%)	Pr(>|z|)
MAF<1e-4	0.0475825	0.0112841	0.083881	0.0101916
1e-4<MAF<1e-3	0.0123841	-0.0249421	0.0497103	0.515513
1e-3<MAF<0.01	-0.00198955	-0.027705	0.0237259	0.879472
0.01<MAF<0.20	0.00619507	-0.00113403	0.0135242	0.0975803

## Sheet: UKB lifespan
	coef	CI (2.5%)	CI (97.5%)	Pr(>|z|)
MAF<1e-4	0.0438079	0.0212327	0.0663831	0.000142737
1e-4<MAF<1e-3	-0.00147673	-0.0241305	0.0211771	0.898336
1e-3<MAF<0.01	0.000953176	-0.0123497	0.014256	0.888316
0.01<MAF<0.20	0.00105058	-0.00500996	0.00711111	0.734042

## Sheet: UKB healthspan
	coef	CI (2.5%)	CI (97.5%)	Pr(>|z|)
MAF<1e-4	0.0164298	0.00936141	0.0234982	5.21983e-06
1e-4<MAF<1e-3	0.00189382	-0.00511569	0.00890332	0.596431
1e-3<MAF<0.01	-0.000107235	-0.0042181	0.00400363	0.959224
0.01<MAF<0.20	-0.00123397	-0.00311464	0.000646699	0.198443

## Sheet: UKB mother age at death
	coef	CI (2.5%)	CI (97.5%)	Pr(>|z|)
MAF<1e-4	0.00675743	0.0017086	0.0118063	0.00870963
1e-4<MAF<1e-3	-0.000523981	-0.00546393	0.00441596	0.835312
1e-3<MAF<0.01	0.00197885	-0.000937931	0.00489563	0.183614
0.01<MAF<0.20	0.000232334	-0.00110283	0.0015675	0.733061

## Sheet: UKB father age at death
	coef	CI (2.5%)	CI (97.5%)	Pr(>|z|)
MAF<1e-4	0.000568556	-0.00393162	0.00506873	0.804426
1e-4<MAF<1e-3	0.00257131	-0.00181766	0.00696029	0.250862
1e-3<MAF<0.01	0.00140867	-0.00119814	0.00401548	0.289543
0.01<MAF<0.20	0.000106445	-0.00108258	0.00129547	0.860717
