# Supplementary material for: Germline burden of rare damaging variants negatively affects human healthspan and lifespan
Source: eLife. 2020 Apr 7;9:e53449. doi: 10.7554/eLife.53449 (PMC7314550; doi:10.7554/eLife.53449)
Supplement: Figure 3—source data 1. [file elife-53449-fig3-data1.xlsx]

## Sheet: UKBBN lifespan
	coef	CI (2.5%)	CI (97.5%)	Pr(>|z|)
TF_binding_site
5_prime_UTR_premature_start_codon_gain	-0.00527026	-0.0213104	0.0107698	0.519588
structural_interaction	-0.011626	-0.0434365	0.0201844	0.47379
3_prime_UTR	0.000224636	-0.000351879	0.000801151	0.445052
5_prime_UTR	-0.000373595	-0.00353706	0.00278987	0.816954
stop_gained	0.058327	0.00118293	0.115471	0.0454423
frameshift	0.0201709	-0.0383438	0.0786855	0.499276
splice_donor	0.122994	0.017935	0.228054	0.0217586
splice_acceptor	0.0404535	-0.0972253	0.178132	0.564691
synonymous	0.00278983	-0.000147729	0.00572739	0.062688

## Sheet: UKB lifespan
UKB lifespan	coef	CI (2.5%)	CI (97.5%)	Pr(>|z|)
TF_binding_site	0.0142869	-0.0256555	0.0542294	0.483268
5_prime_UTR_premature_start_codon_gain	-0.0460378	-0.101753	0.00967753	0.105334
structural_interaction	-0.00375558	-0.045432	0.0379208	0.859809
3_prime_UTR	-0.0056873	-0.0230823	0.0117077	0.521645
5_prime_UTR	-0.00229461	-0.0232806	0.0186914	0.830311
stop_gained	0.0535108	0.0146458	0.0923758	0.00696415
frameshift	0.0495395	0.0167432	0.0823358	0.00307072
splice_donor	0.0388233	-0.0277305	0.105377	0.252906
splice_acceptor	-0.0126886	-0.091732	0.0663547	0.753044
synonymous	0.00163705	-0.00709597	0.0103701	0.713317

## Sheet: UKB healthspan
UKB healthspan	coef	CI (2.5%)	CI (97.5%)	Pr(>|z|)
TF_binding_site	0.00011948	-0.0123722	0.0126111	0.985043
5_prime_UTR_premature_start_codon_gain	-0.00727568	-0.0242362	0.00968486	0.400472
structural_interaction	0.00703291	-0.00581216	0.019878	0.283219
3_prime_UTR	-0.000361137	-0.00573691	0.00501464	0.895247
5_prime_UTR	0.000425766	-0.00607044	0.00692197	0.897787
stop_gained	0.0182555	0.00601705	0.0304939	0.00346024
frameshift	0.0152723	0.00493067	0.025614	0.00379846
splice_donor	0.0214769	0.000443575	0.0425101	0.0453603
splice_acceptor	0.0107993	-0.0133423	0.0349409	0.380619
synonymous	-0.000709562	-0.00341886	0.00199973	0.607732

## Sheet: UKB mother age at death
UKB mother age at death	coef	CI (2.5%)	CI (97.5%)	Pr(>|z|)
TF_binding_site	-0.0016242	-0.0104812	0.00723275	0.71928
5_prime_UTR_premature_start_codon_gain	0.00475408	-0.00731819	0.0168264	0.440211
structural_interaction	0.00567555	-0.00342573	0.0147768	0.22162
3_prime_UTR	-0.00320612	-0.00701278	0.000600545	0.0987882
5_prime_UTR	-0.00250959	-0.00712814	0.00210896	0.286881
stop_gained	0.0139741	0.00524438	0.0227038	0.00170446
frameshift	0.00734738	-7.07234e-05	0.0147655	0.0522246
splice_donor	-0.0110466	-0.0260147	0.00392153	0.148046
splice_acceptor	0.00495341	-0.0122088	0.0221156	0.571603
synonymous	-0.00132243	-0.00324581	0.00060094	0.17779

## Sheet: UKB father age at death
UKB father age at death	coef	CI (2.5%)	CI (97.5%)	Pr(>|z|)
TF_binding_site	0.00112965	-0.00674674	0.00900603	0.778632
5_prime_UTR_premature_start_codon_gain	0.00446869	-0.00619957	0.0151369	0.411655
structural_interaction	-0.000578624	-0.00869024	0.00753299	0.88881
3_prime_UTR	-0.000358616	-0.0037744	0.00305717	0.836969
5_prime_UTR	-0.00128546	-0.00540693	0.00283601	0.541001
stop_gained	-0.000929266	-0.00872647	0.00686794	0.815305
frameshift	0.00532616	-0.00126671	0.011919	0.113333
splice_donor	-0.00810912	-0.0214784	0.00526016	0.234513
splice_acceptor	-0.00197914	-0.0173266	0.0133683	0.800462
synonymous	-0.00149406	-0.00320621	0.000218082	0.0872074
