# Supplementary material for: Germline burden of rare damaging variants negatively affects human healthspan and lifespan
Source: eLife. 2020 Apr 7;9:e53449. doi: 10.7554/eLife.53449 (PMC7314550; doi:10.7554/eLife.53449)
Supplement: Supplementary file 1. — Burdens of ultra-rare PTVs for each gene were compared between subjects with short and long lifespan. [file elife-53449-supp1.xls]

## Sheet: Lifespan
gene	OR	P-val	FDR p-val
ATAD3B	5.0289	0.217529	1
PCNX2	0.198851	0.217529	1
SPAG17	5.0289	0.217529	1
XDH	0.198851	0.217529	1
XIRP2	0.198851	0.217529	1
FLG	0.440862	0.26411	1
USH2A	0.331287	0.287351	1
CHD1L	0.248976	0.373914	1
DNAH6	4.01644	0.373914	1
GDF7	4.01644	0.373914	1
GRB14	0.248976	0.373914	1
HRNR	0.248976	0.373914	1
IGFN1	4.01644	0.373914	1
MAP3K19	0.248976	0.373914	1
OR2T27	4.01644	0.373914	1
RPF1	0.248976	0.373914	1
ZNF697	4.01644	0.373914	1
IGSF9	2.51136	0.451698	1
MYO3B	2.51136	0.451698	1
SAMD11	2.51136	0.451698	1
ARHGEF19	3.008	0.624349	1
ASPM	0.332446	0.624349	1
ATP1A4	3.008	0.624349	1
AVPR1B	3.008	0.624349	1
C1orf216	0.332446	0.624349	1
C1orf94	3.008	0.624349	1
C2orf71	3.008	0.624349	1
C8B	0.332446	0.624349	1
CACHD1	3.008	0.624349	1
CCDC27	3.008	0.624349	1
CCDC74A	0.332446	0.624349	1
CCDC74B	3.008	0.624349	1
CEBPZ	0.332446	0.624349	1
CGN	3.008	0.624349	1
CLCA2	0.332446	0.624349	1
COG2	0.332446	0.624349	1
CPTP	3.008	0.624349	1
CR1	0.332446	0.624349	1
CR1L	3.008	0.624349	1
DHX57	0.332446	0.624349	1
DOCK7	0.332446	0.624349	1
DPYD	0.332446	0.624349	1
DUSP27	3.008	0.624349	1
EDAR	0.332446	0.624349	1
EPHB2	3.008	0.624349	1
ERICH3	0.332446	0.624349	1
FAM131C	0.332446	0.624349	1
FAM179A	3.008	0.624349	1
FEZ2	0.332446	0.624349	1
FMO3	3.008	0.624349	1
GCKR	3.008	0.624349	1
GORAB	3.008	0.624349	1
GPR89B	0.332446	0.624349	1
HEATR5B	3.008	0.624349	1
HECTD3	0.332446	0.624349	1
HHIPL2	0.332446	0.624349	1
IL19	0.332446	0.624349	1
IMP4	0.332446	0.624349	1
LAD1	3.008	0.624349	1
LCT	0.332446	0.624349	1
LIMS1	3.008	0.624349	1
LPIN1	0.332446	0.624349	1
LRIG2	3.008	0.624349	1
LUZP1	3.008	0.624349	1
LY9	0.332446	0.624349	1
MAST2	0.332446	0.624349	1
MED8	0.332446	0.624349	1
MIB2	0.332446	0.624349	1
MRPL20	0.332446	0.624349	1
NEURL3	3.008	0.624349	1
NIT1	0.332446	0.624349	1
NPHP4	0.332446	0.624349	1
OR14C36	3.008	0.624349	1
OR2G6	3.008	0.624349	1
OR2L5	0.332446	0.624349	1
OR2L8	3.008	0.624349	1
PADI2	3.008	0.624349	1
PATJ	0.332446	0.624349	1
PRAMEF19	3.008	0.624349	1
PRAMEF4	3.008	0.624349	1
PTPN7	0.332446	0.624349	1
RAD54L	3.008	0.624349	1
RNF115	0.332446	0.624349	1
SEPT10	3.008	0.624349	1
SLC35E2B	0.332446	0.624349	1
SLC5A9	0.332446	0.624349	1
STARD7	3.008	0.624349	1
TAF1A	3.008	0.624349	1
TARBP1	3.008	0.624349	1
TCTEX1D4	3.008	0.624349	1
TEKT4	0.332446	0.624349	1
THADA	3.008	0.624349	1
TMEM87B	0.332446	0.624349	1
TOR1AIP1	0.332446	0.624349	1
TRIM45	3.008	0.624349	1
TSSC1	0.332446	0.624349	1
TTC31	0.332446	0.624349	1
TTC7A	3.008	0.624349	1
VAV3	3.008	0.624349	1
WDR3	0.332446	0.624349	1
WDSUB1	0.332446	0.624349	1
AIM1L	2.0058	0.686685	1
FLG2	0.498553	0.686685	1
HMCN1	2.0058	0.686685	1
HMGB4	0.498553	0.686685	1
IFIH1	2.0058	0.686685	1
PDE4DIP	0.498553	0.686685	1
PTGER3	2.0058	0.686685	1
TTLL10	2.0058	0.686685	1
VWA3B	0.498553	0.686685	1
ANKRD36	0.598174	0.72561	1
CENPF	0.598174	0.72561	1
OBSCN	0.797346	0.813066	1
CCDC17	1	1	1
CR2	1.33532	1	1
DNMT3A	0.748882	1	1
GPAT2	1.33532	1	1
HFM1	1	1	1
IFI16	1	1	1
IFT172	1	1	1
MAP3K6	1	1	1
MKNK1	1	1	1
MTIF2	1	1	1
PHTF1	1.33532	1	1
TTN	0.898499	1	1
A3GALT2	0.499424	1	1
ABCA4	0.499424	1	1
ABCG5	0.499424	1	1
ACADM	1	1	1
ACMSD	0.499424	1	1
ACOT11	1	1	1
ACOXL	0.499424	1	1
ACTN2	0.499424	1	1
ADAM15	2.00231	1	1
ADAM17	0.499424	1	1
ADCY10	0.665743	1	1
AGBL4	2.00231	1	1
AGBL5	1	1	1
AGMAT	0.499424	1	1
AKNAD1	2.00231	1	1
ALG6	2.00231	1	1
ALK	1	1	1
AMMECR1L	2.00231	1	1
AMPD2	2.00231	1	1
AMY2A	2.00231	1	1
ANGPTL7	2.00231	1	1
ANKRD35	0.499424	1	1
ANKRD53	0.499424	1	1
ANKRD65	1.50208	1	1
ANXA9	0.499424	1	1
APLF	1	1	1
APOA2	0.499424	1	1
ARHGEF33	2.00231	1	1
ASTL	1	1	1
ATAD3A	2.00231	1	1
ATF6	2.00231	1	1
ATP13A2	0.499424	1	1
ATP6V0B	0.499424	1	1
ATP8B2	0.499424	1	1
ATPAF1	0.499424	1	1
AUNIP	0.499424	1	1
BAZ2B	2.00231	1	1
BCAR3	0.499424	1	1
BEND5	2.00231	1	1
BEST4	0.499424	1	1
BMP8A	2.00231	1	1
BOLA3	2.00231	1	1
BRDT	0.499424	1	1
BRE	0.499424	1	1
BSND	1	1	1
BTBD19	1	1	1
BTBD8	2.00231	1	1
BUB1	0.499424	1	1
C1D	2.00231	1	1
C1orf101	1	1	1
C1orf109	1	1	1
C1orf111	0.499424	1	1
C1orf115	0.499424	1	1
C1orf116	0.499424	1	1
C1orf127	1	1	1
C1orf167	1	1	1
C1orf185	0.499424	1	1
C1orf194	1.50208	1	1
C1orf204	0.499424	1	1
C1orf43	2.00231	1	1
C1orf56	0.499424	1	1
C1orf64	0.499424	1	1
C1QL2	0.499424	1	1
C2CD4D	0.665743	1	1
C2orf16	2.00231	1	1
C2orf50	0.499424	1	1
C2orf68	1	1	1
C2orf70	0.499424	1	1
C2orf78	2.00231	1	1
C2orf81	0.499424	1	1
C4BPB	2.00231	1	1
C8A	1	1	1
CA14	2.00231	1	1
CACNA1S	0.665743	1	1
CALML6	2.00231	1	1
CAPN14	2.00231	1	1
CAPN9	2.00231	1	1
CAPZA1	2.00231	1	1
CASQ2	2.00231	1	1
CATSPER4	0.499424	1	1
CC2D1B	2.00231	1	1
CCDC121	0.499424	1	1
CCDC141	0.499424	1	1
CCDC142	2.00231	1	1
CCDC148	2.00231	1	1
CCDC173	2.00231	1	1
CCDC18	2.00231	1	1
CCDC181	1	1	1
CCDC185	2.00231	1	1
CCDC24	0.499424	1	1
CCDC30	1	1	1
CCDC88A	2.00231	1	1
CD1B	0.499424	1	1
CD1E	0.499424	1	1
CD207	2.00231	1	1
CD84	2.00231	1	1
CD8A	0.499424	1	1
CDC14A	0.499424	1	1
CDC42EP3	2.00231	1	1
CDCA8	1	1	1
CDCP2	0.499424	1	1
CDK11A	2.00231	1	1
CELA2A	2.00231	1	1
CELA2B	2.00231	1	1
CELA3B	0.499424	1	1
CENPO	2.00231	1	1
CEP350	0.499424	1	1
CEP85	1.50208	1	1
CFAP221	2.00231	1	1
CFAP36	0.499424	1	1
CFAP74	0.499424	1	1
CFHR5	2.00231	1	1
CHD5	2.00231	1	1
CHIT1	0.499424	1	1
CIB4	0.499424	1	1
CIR1	0.499424	1	1
CLCA1	0.499424	1	1
CLCA4	2.00231	1	1
CLCNKA	2.00231	1	1
CLCNKB	0.499424	1	1
CLSPN	0.499424	1	1
CMPK1	2.00231	1	1
CNIH4	0.499424	1	1
CNKSR1	0.499424	1	1
COL11A1	0.499424	1	1
COL16A1	0.499424	1	1
COL24A1	1	1	1
COLGALT2	2.00231	1	1
COX20	2.00231	1	1
COX7A2L	2.00231	1	1
CPSF3	2.00231	1	1
CPSF3L	0.499424	1	1
CPT2	2.00231	1	1
CREG1	0.499424	1	1
CREG2	2.00231	1	1
CRIPT	2.00231	1	1
CROCC	2.00231	1	1
CRTC2	2.00231	1	1
CRYZ	2.00231	1	1
CSDE1	0.499424	1	1
CSF3R	2.00231	1	1
CSRNP3	2.00231	1	1
CTRC	2.00231	1	1
CTSE	2.00231	1	1
CTSS	0.499424	1	1
CTTNBP2NL	0.499424	1	1
CYB5RL	2.00231	1	1
CYP4A11	0.499424	1	1
CYP4A22	0.499424	1	1
CYP4X1	0.499424	1	1
DAB1	0.499424	1	1
DAP3	0.499424	1	1
DARS	0.499424	1	1
DARS2	0.499424	1	1
DCDC2B	2.00231	1	1
DCLRE1B	2.00231	1	1
DCST1	2.00231	1	1
DDX20	2.00231	1	1
DEGS1	2.00231	1	1
DENND2C	2.00231	1	1
DENND2D	0.499424	1	1
DENND4B	2.00231	1	1
DFNB59	0.499424	1	1
DHCR24	0.499424	1	1
DIEXF	0.499424	1	1
DIO1	0.499424	1	1
DISP1	0.499424	1	1
DNAH14	0.798761	1	1
DNAJC16	0.499424	1	1
DNAJC5G	2.00231	1	1
DNAJC6	2.00231	1	1
DNALI1	2.00231	1	1
DNTTIP2	1	1	1
DPT	2.00231	1	1
DQX1	2.00231	1	1
DRAM2	2.00231	1	1
DUSP12	2.00231	1	1
DYSF	1	1	1
E2F2	2.00231	1	1
ECM1	1	1	1
EDEM3	0.499424	1	1
EFR3B	2.00231	1	1
EIF2AK2	2.00231	1	1
EIF3I	2.00231	1	1
EMILIN1	1	1	1
EML4	2.00231	1	1
EML6	2.00231	1	1
ENAH	2.00231	1	1
EPB41	0.499424	1	1
EPCAM	0.499424	1	1
EPHA2	2.00231	1	1
EPHA8	1	1	1
EPHX1	0.499424	1	1
ERMAP	2.00231	1	1
ERMN	2.00231	1	1
ESRRG	2.00231	1	1
ETAA1	1	1	1
EVI5	2.00231	1	1
EVX2	0.499424	1	1
EXO1	1	1	1
EXOSC10	2.00231	1	1
EXTL1	0.499424	1	1
F5	0.499424	1	1
FAAH	0.499424	1	1
FABP1	2.00231	1	1
FAM129A	2.00231	1	1
FAM161A	1	1	1
FAM167B	2.00231	1	1
FAM178B	0.499424	1	1
FAM228A	2.00231	1	1
FAM71A	0.499424	1	1
FAM89A	2.00231	1	1
FANCL	0.499424	1	1
FBLIM1	2.00231	1	1
FBLN7	0.499424	1	1
FBXO2	0.499424	1	1
FBXO6	2.00231	1	1
FCGR2B	0.499424	1	1
FCN3	2.00231	1	1
FCRL2	2.00231	1	1
FCRL6	2.00231	1	1
FCRLB	2.00231	1	1
FER1L5	1.50208	1	1
FGGY	1	1	1
FKBP7	2.00231	1	1
FLAD1	0.499424	1	1
FMN2	2.00231	1	1
FNDC7	0.499424	1	1
FOXD3	2.00231	1	1
FOXJ3	0.499424	1	1
FSHR	0.499424	1	1
GABPB2	2.00231	1	1
GABRD	2.00231	1	1
GALE	2.00231	1	1
GBP1	2.00231	1	1
GBP2	2.00231	1	1
GBP3	2.00231	1	1
GBP4	2.00231	1	1
GBP5	2.00231	1	1
GBP6	1.50208	1	1
GBP7	0.499424	1	1
GCC2	2.00231	1	1
GEMIN6	0.499424	1	1
GIPC2	1	1	1
GJA5	2.00231	1	1
GJA9	2.00231	1	1
GJB3	0.499424	1	1
GLI2	2.00231	1	1
GLMN	1	1	1
GLMP	2.00231	1	1
GLRX2	0.499424	1	1
GLUL	2.00231	1	1
GNL2	0.499424	1	1
GOLPH3L	2.00231	1	1
GOLT1A	2.00231	1	1
GPA33	0.499424	1	1
GPATCH11	1	1	1
GPATCH2	2.00231	1	1
GPBP1L1	2.00231	1	1
GPD2	2.00231	1	1
GPN1	2.00231	1	1
GPR137B	0.499424	1	1
GPR148	2.00231	1	1
GPR153	0.499424	1	1
GPR37L1	0.499424	1	1
GPR39	0.499424	1	1
GPR89A	0.499424	1	1
GPSM2	2.00231	1	1
GSTM2	0.499424	1	1
GSTM5	2.00231	1	1
GTDC1	1	1	1
GTF2B	0.499424	1	1
H6PD	2.00231	1	1
HAAO	1	1	1
HCRTR1	2.00231	1	1
HEATR1	0.499424	1	1
HFE2	0.499424	1	1
HIVEP3	1	1	1
HNMT	2.00231	1	1
HOOK1	0.499424	1	1
HOXD1	0.499424	1	1
HOXD11	2.00231	1	1
HSD17B7	2.00231	1	1
HSPG2	0.499424	1	1
HYI	0.499424	1	1
IGSF3	0.499424	1	1
IL12RB2	0.499424	1	1
IL18R1	2.00231	1	1
IL18RAP	2.00231	1	1
IL1R2	2.00231	1	1
IL1RL2	0.499424	1	1
ILDR2	2.00231	1	1
IMMT	1	1	1
INO80B	0.499424	1	1
INSIG2	2.00231	1	1
INSRR	0.499424	1	1
IRF2BP2	2.00231	1	1
ITGB6	0.499424	1	1
ITLN1	0.499424	1	1
ITLN2	0.499424	1	1
ITSN2	1	1	1
IVL	0.499424	1	1
KCNQ4	0.499424	1	1
KCTD3	2.00231	1	1
KDM1A	0.499424	1	1
KDM3A	0.499424	1	1
KDM5B	2.00231	1	1
KHK	0.499424	1	1
KIAA0319L	2.00231	1	1
KIAA1522	1.50208	1	1
KIAA1614	0.499424	1	1
KIDINS220	0.499424	1	1
KIF14	0.499424	1	1
KIFAP3	2.00231	1	1
KLHDC7A	2.00231	1	1
KLHL21	1	1	1
KLHL23	2.00231	1	1
KLHL41	0.499424	1	1
KPRP	0.499424	1	1
KRTCAP3	0.499424	1	1
KYNU	1	1	1
L1TD1	0.499424	1	1
LAMB3	0.499424	1	1
LAMC1	0.499424	1	1
LAMC2	2.00231	1	1
LBH	2.00231	1	1
LCE1D	2.00231	1	1
LCE2B	2.00231	1	1
LCE3D	1	1	1
LCLAT1	0.499424	1	1
LDAH	2.00231	1	1
LEFTY1	0.499424	1	1
LEFTY2	0.499424	1	1
LINGO4	0.499424	1	1
LMAN2L	2.00231	1	1
LNPK	0.499424	1	1
LRIF1	0.499424	1	1
LRP2	0.499424	1	1
LRPPRC	0.499424	1	1
LRRC42	0.499424	1	1
LRRC8C	0.499424	1	1
LRRIQ3	2.00231	1	1
LY75	0.499424	1	1
LYPD6	0.499424	1	1
MAB21L3	2.00231	1	1
MAGI3	0.499424	1	1
MAN1A2	2.00231	1	1
MAP10	1	1	1
MARCH7	0.499424	1	1
MARCO	2.00231	1	1
MASP2	2.00231	1	1
MATN1	0.499424	1	1
MCOLN3	1	1	1
MED18	2.00231	1	1
MERTK	0.665743	1	1
MIGA1	1	1	1
MMACHC	0.499424	1	1
MMP23B	2.00231	1	1
MOGS	1	1	1
MPL	2.00231	1	1
MPZL1	2.00231	1	1
MROH7	0.499424	1	1
MROH9	1	1	1
MRPL19	0.499424	1	1
MRPL35	0.499424	1	1
MRPS14	1	1	1
MRPS15	0.499424	1	1
MRPS21	2.00231	1	1
MSH4	2.00231	1	1
MTMR11	0.665743	1	1
MTR	2.00231	1	1
MTX2	1	1	1
MYBPH	1	1	1
MYO7B	2.00231	1	1
MZT2B	0.499424	1	1
NADK	1.50208	1	1
NAV1	0.499424	1	1
NBAS	0.665743	1	1
NBPF1	2.00231	1	1
NCKAP1	2.00231	1	1
NCKAP5	0.499424	1	1
NDUFS5	2.00231	1	1
NEB	0.665743	1	1
NECAP2	0.499424	1	1
NES	1	1	1
NID1	0.499424	1	1
NLRC4	0.499424	1	1
NMI	2.00231	1	1
NMS	2.00231	1	1
NOTO	0.499424	1	1
NRAS	0.499424	1	1
NT5C1B	2.00231	1	1
NUF2	2.00231	1	1
NUP210L	0.499424	1	1
ODF2L	0.499424	1	1
OLFML3	2.00231	1	1
OPRD1	0.499424	1	1
OR11L1	0.499424	1	1
OR2AK2	2.00231	1	1
OR2L2	2.00231	1	1
OR2M7	1	1	1
OR6K2	2.00231	1	1
OR6Y1	0.499424	1	1
ORC4	1	1	1
OTOF	0.499424	1	1
OXCT2	0.499424	1	1
P3H1	2.00231	1	1
PADI4	0.499424	1	1
PAFAH2	2.00231	1	1
PAPPA2	1.50208	1	1
PAQR6	1	1	1
PAQR7	2.00231	1	1
PCSK9	0.499424	1	1
PCYOX1	2.00231	1	1
PDCL3	0.499424	1	1
PDE1A	2.00231	1	1
PDK1	0.499424	1	1
PER3	1.50208	1	1
PEX13	2.00231	1	1
PFDN2	2.00231	1	1
PGBD2	0.499424	1	1
PGLYRP4	0.499424	1	1
PGM1	0.499424	1	1
PHACTR4	0.499424	1	1
PIAS3	2.00231	1	1
PIGF	0.499424	1	1
PIGK	2.00231	1	1
PIGM	2.00231	1	1
PIGV	1	1	1
PIK3C2B	0.499424	1	1
PIK3R3	2.00231	1	1
PINK1	0.499424	1	1
PLA2G2F	0.499424	1	1
PLA2R1	0.665743	1	1
PLB1	1.50208	1	1
PLEKHG5	1	1	1
PLEKHM2	2.00231	1	1
PLEKHO1	2.00231	1	1
PLOD1	1	1	1
PLPPR4	0.499424	1	1
PNRC2	2.00231	1	1
POMGNT1	0.499424	1	1
POTEF	2.00231	1	1
POTEI	1	1	1
PPM1J	2.00231	1	1
PPP1R21	2.00231	1	1
PPP2R5A	1	1	1
PQLC2	0.499424	1	1
PRAMEF1	0.665743	1	1
PRAMEF10	0.499424	1	1
PRAMEF15	0.499424	1	1
PREB	2.00231	1	1
PRELP	0.499424	1	1
PRKCE	0.499424	1	1
PRKCZ	2.00231	1	1
PRRC2C	1	1	1
PSEN2	0.499424	1	1
PTBP2	2.00231	1	1
PTPN18	2.00231	1	1
PTPN22	2.00231	1	1
PTPRC	0.499424	1	1
PXDN	0.499424	1	1
R3HDM1	0.499424	1	1
RAB3GAP1	0.499424	1	1
RAB6C	2.00231	1	1
RABL2A	0.499424	1	1
RALGPS2	2.00231	1	1
RASSF5	2.00231	1	1
RAVER2	2.00231	1	1
RCSD1	0.499424	1	1
REG1B	0.499424	1	1
RETSAT	2.00231	1	1
REV1	0.499424	1	1
RFX8	1	1	1
RGPD1	0.499424	1	1
RGPD2	2.00231	1	1
RGPD3	1.50208	1	1
RGS18	2.00231	1	1
RGS7	0.499424	1	1
RGSL1	0.499424	1	1
RHBDL2	2.00231	1	1
RHOB	2.00231	1	1
RNF207	0.665743	1	1
RNPEP	2.00231	1	1
ROR1	2.00231	1	1
RP1-27O5.3	0.499424	1	1
RP4-559A3.7	2.00231	1	1
RPAP2	2.00231	1	1
RPTN	2.00231	1	1
RRNAD1	0.499424	1	1
RSBN1	0.499424	1	1
RSG1	0.499424	1	1
RTN4	0.499424	1	1
RXFP4	2.00231	1	1
RYR2	0.665743	1	1
S100A2	0.499424	1	1
SASS6	0.499424	1	1
SCCPDH	0.499424	1	1
SCMH1	2.00231	1	1
SCN3A	2.00231	1	1
SCNN1D	1.50208	1	1
SDC1	2.00231	1	1
SDE2	0.499424	1	1
SELENBP1	2.00231	1	1
SEMA4F	2.00231	1	1
SEMA6C	2.00231	1	1
SFTPB	1	1	1
SH3D21	2.00231	1	1
SIX2	2.00231	1	1
SLAMF6	2.00231	1	1
SLAMF7	1	1	1
SLC25A24	2.00231	1	1
SLC25A34	1	1	1
SLC26A9	1	1	1
SLC30A7	0.499424	1	1
SLC35A3	2.00231	1	1
SLC35F5	1.50208	1	1
SLC3A1	0.499424	1	1
SLC45A1	2.00231	1	1
SLC50A1	2.00231	1	1
SLC5A6	2.00231	1	1
SLC6A9	0.499424	1	1
SMC6	0.499424	1	1
SMPD4	1.50208	1	1
SMYD2	0.499424	1	1
SNAP47	1	1	1
SOAT1	1.50208	1	1
SPATA17	0.499424	1	1
SPOCD1	2.00231	1	1
SPR	2.00231	1	1
SPRR1B	0.499424	1	1
SRBD1	0.499424	1	1
STK40	2.00231	1	1
STON1-GTF2A1L	0.499424	1	1
STRIP1	1	1	1
STRN	2.00231	1	1
SUCLG1	1	1	1
SUCO	0.499424	1	1
SULT1C2	2.00231	1	1
SULT6B1	0.499424	1	1
SUSD4	2.00231	1	1
SYCP1	2.00231	1	1
SZT2	0.665743	1	1
TACSTD2	0.499424	1	1
TAF5L	2.00231	1	1
TANC1	0.499424	1	1
TARS2	2.00231	1	1
TAS1R1	0.499424	1	1
TAS1R3	0.499424	1	1
TBC1D8	1	1	1
TBCE	1	1	1
TCEA3	0.499424	1	1
TCHH	0.665743	1	1
TCHHL1	0.499424	1	1
TDRD5	1	1	1
TDRKH	0.499424	1	1
TESK2	0.665743	1	1
TFAP2E	0.499424	1	1
TGFBR3	2.00231	1	1
THBS3	0.499424	1	1
THRAP3	0.499424	1	1
TIE1	0.499424	1	1
TIMM17A	0.499424	1	1
TLK1	2.00231	1	1
TLR5	0.499424	1	1
TMCO1	0.499424	1	1
TMCO4	2.00231	1	1
TMEM125	2.00231	1	1
TMEM200B	2.00231	1	1
TMEM206	2.00231	1	1
TMEM234	2.00231	1	1
TMEM59	0.499424	1	1
TMEM63A	0.499424	1	1
TMEM81	2.00231	1	1
TNFSF4	0.499424	1	1
TNN	1	1	1
TNNI3K	0.499424	1	1
TOE1	0.499424	1	1
TOR1AIP2	0.499424	1	1
TP73	0.499424	1	1
TRABD2B	2.00231	1	1
TRAF3IP3	2.00231	1	1
TRAF5	2.00231	1	1
TRIM43	0.499424	1	1
TRIM62	2.00231	1	1
TRMT61B	1	1	1
TTC22	2.00231	1	1
TTC30A	0.499424	1	1
TTC39A	0.499424	1	1
TTL	2.00231	1	1
TTLL7	0.499424	1	1
TXNDC12	2.00231	1	1
UBE2U	0.499424	1	1
UBXN11	1	1	1
UBXN2A	2.00231	1	1
UFC1	2.00231	1	1
UHMK1	2.00231	1	1
UNC50	0.499424	1	1
URB2	2.00231	1	1
VASH2	2.00231	1	1
VAX2	2.00231	1	1
VHLL	0.499424	1	1
VIT	2.00231	1	1
VPS45	0.499424	1	1
VPS72	0.499424	1	1
VWA5B1	1	1	1
WDR35	1	1	1
WDR43	1.50208	1	1
WDR54	2.00231	1	1
WDR63	1	1	1
WTH3DI	0.499424	1	1
YIPF1	1	1	1
YY1AP1	2.00231	1	1
ZAP70	2.00231	1	1
ZBED6	0.499424	1	1
ZC3H8	2.00231	1	1
ZFP69	0.499424	1	1
ZFP69B	2.00231	1	1
ZFYVE9	1	1	1
ZMYM6	2.00231	1	1
ZNF514	0.499424	1	1
ZNF672	2.00231	1	1
ZNF687	2.00231	1	1
ZRANB3	1	1	1
ZSCAN20	2.00231	1	1
ZYG11A	2.00231	1	1
ZZZ3	2.00231	1	1
