# Supplementary material for: Germline burden of rare damaging variants negatively affects human healthspan and lifespan
Source: eLife. 2020 Apr 7;9:e53449. doi: 10.7554/eLife.53449 (PMC7314550; doi:10.7554/eLife.53449)
Supplement: Supplementary file 2. — Burdens of ultra-rare PTVs for each gene were compared between subjects with short and long healthspan in both sexes, and separately in females and males . [file elife-53449-supp2.xls]

## Sheet: Healthspan-all
gene	OR	P-val	FDR p-val
EML4	13.1696	0.000917696	0.692812
RGPD4	4.25634	0.00141897	0.692812
MST1R	4.81297	0.0014494	0.692812
DUSP27	4.55888	0.0024543	0.833259
TRANK1	3.18499	0.00495562	0.833259
LRRC40	10.1217	0.00607345	0.833259
MTR	6.07458	0.00706591	0.833259
ACOXL	9.10886	0.0112774	0.833259
MAP4	9.10886	0.0112774	0.833259
NUP210	3.7971	0.0113397	0.833259
DPT	0.100966	0.0116961	0.833259
FBLIM1	0.100966	0.0116961	0.833259
HSD3B2	0.100966	0.0116961	0.833259
FBLN2	5.56742	0.0124487	0.833259
C1orf194	0.296797	0.0168387	0.833259
SHCBP1L	4.04893	0.0205484	0.833259
OR10J1	8.09543	0.0207922	0.833259
RABGAP1L	8.09543	0.0207922	0.833259
WNT10A	8.09543	0.0207922	0.833259
GNAT1	0.11219	0.0214519	0.833259
OXER1	0.11219	0.0214519	0.833259
AHSA2	5.06042	0.0217258	0.833259
GLMN	0.183556	0.0224168	0.833259
C1orf101	3.29032	0.0299303	0.833259
NES	3.29032	0.0299303	0.833259
RGPD2	3.29032	0.0299303	0.833259
VIT	0.28841	0.0308062	0.833259
ARHGEF19	3.71086	0.0341331	0.833259
DNAH6	0.438593	0.0349253	0.833259
CNGA3	0.252396	0.035086	0.833259
TTLL10	0.252396	0.035086	0.833259
C8B	4.55359	0.0375067	0.833259
NCKIPSD	4.55359	0.0375067	0.833259
TMCO4	4.55359	0.0375067	0.833259
TMEM59	4.55359	0.0375067	0.833259
HMGB4	7.08233	0.0380124	0.833259
NPL	7.08233	0.0380124	0.833259
SLC22A13	7.08233	0.0380124	0.833259
TTC24	7.08233	0.0380124	0.833259
WDSUB1	7.08233	0.0380124	0.833259
CFHR4	0.126235	0.039018	0.833259
PREB	0.126235	0.039018	0.833259
SLC2A7	0.126235	0.039018	0.833259
SLC9A4	0.126235	0.039018	0.833259
EML6	2.83466	0.0402141	0.833259
SPAG17	2.83466	0.0402141	0.833259
TNN	0.392429	0.0431493	0.833259
ACADL	3.03664	0.0477508	0.833259
ANKZF1	3.03664	0.0477508	0.833259
PTCD3	3.03664	0.0477508	0.833259
IFT172	0.310588	0.0489422	0.833259
SEMA4F	0.310588	0.0489422	0.833259
IGSF9	2.53097	0.051095	0.833259
OTOF	0.378476	0.0523437	0.833259
DISP1	3.3736	0.055972	0.833259
EFCAB7	3.3736	0.055972	0.833259
LCT	3.3736	0.055972	0.833259
TTC31	3.3736	0.055972	0.833259
MAP3K6	0.275388	0.0572828	0.833259
PHTF1	0.275388	0.0572828	0.833259
SMPDL3B	0.275388	0.0572828	0.833259
MYOM3	2.63176	0.0620347	0.833259
TTN	1.40904	0.062733	0.833259
UBE2U	0.360512	0.0634371	0.833259
ASAP3	4.04691	0.0639388	0.833259
DCLRE1B	4.04691	0.0639388	0.833259
HOXD12	4.04691	0.0639388	0.833259
RANBP2	4.04691	0.0639388	0.833259
SLC19A3	4.04691	0.0639388	0.833259
FAM89A	0.224422	0.0653532	0.833259
LY9	0.224422	0.0653532	0.833259
MORN1	0.224422	0.0653532	0.833259
NBPF10	0.224422	0.0653532	0.833259
NEK10	0.224422	0.0653532	0.833259
WDR63	0.224422	0.0653532	0.833259
ADRA2B	6.06955	0.0687879	0.833259
AGBL4	6.06955	0.0687879	0.833259
BMP8A	6.06955	0.0687879	0.833259
C1orf185	6.06955	0.0687879	0.833259
C2orf70	6.06955	0.0687879	0.833259
CHI3L1	6.06955	0.0687879	0.833259
CRYBA2	6.06955	0.0687879	0.833259
CRYGD	6.06955	0.0687879	0.833259
GRIP2	6.06955	0.0687879	0.833259
HENMT1	6.06955	0.0687879	0.833259
MT1HL1	6.06955	0.0687879	0.833259
NME7	6.06955	0.0687879	0.833259
NPPA	6.06955	0.0687879	0.833259
OR2AK2	6.06955	0.0687879	0.833259
OSBPL10	6.06955	0.0687879	0.833259
PCSK9	6.06955	0.0687879	0.833259
SDC1	6.06955	0.0687879	0.833259
SLC23A3	6.06955	0.0687879	0.833259
TACSTD2	6.06955	0.0687879	0.833259
TIGD1	6.06955	0.0687879	0.833259
ELP6	0.144292	0.0702548	0.833259
GPR35	0.144292	0.0702548	0.833259
OR2L8	0.144292	0.0702548	0.833259
STK25	0.144292	0.0702548	0.833259
WDR77	0.144292	0.0702548	0.833259
ABCA4	2.78312	0.0751254	0.833259
CCDC27	2.78312	0.0751254	0.833259
TNNI3K	2.78312	0.0751254	0.833259
UBXN11	2.78312	0.0751254	0.833259
ZNF678	2.78312	0.0751254	0.833259
SCN7A	2.36187	0.0766037	0.833259
ANKMY1	0.336532	0.0766897	0.833259
POTEF	0.336532	0.0766897	0.833259
C1orf167	1.93302	0.0782703	0.833259
ATAD3B	0.4781	0.0869265	0.833259
CENPF	0.526516	0.0892365	0.833259
CDC14A	3.03563	0.0904455	0.833259
CLCA4	3.03563	0.0904455	0.833259
FMN2	3.03563	0.0904455	0.833259
MST1	3.03563	0.0904455	0.833259
RAPH1	3.03563	0.0904455	0.833259
VILL	3.03563	0.0904455	0.833259
GPSM2	0.30298	0.0921747	0.833259
SNX27	0.30298	0.0921747	0.833259
C1orf112	2.42894	0.0943222	0.833259
ZRANB3	2.42894	0.0943222	0.833259
ABI2	3.5404	0.107396	0.833259
AKNAD1	3.5404	0.107396	0.833259
BSND	3.5404	0.107396	0.833259
C2orf73	3.5404	0.107396	0.833259
CASP10	3.5404	0.107396	0.833259
COL9A2	3.5404	0.107396	0.833259
LYST	3.5404	0.107396	0.833259
METTL18	3.5404	0.107396	0.833259
MR1	3.5404	0.107396	0.833259
PDCL3	3.5404	0.107396	0.833259
ZNF852	3.5404	0.107396	0.833259
CKAP2L	0.252519	0.109282	0.833259
GALNT15	0.252519	0.109282	0.833259
IGSF8	0.252519	0.109282	0.833259
SLC25A24	0.252519	0.109282	0.833259
TRNT1	0.252519	0.109282	0.833259
VRK2	0.252519	0.109282	0.833259
WDR75	0.252519	0.109282	0.833259
C1orf168	2.19269	0.113183	0.833259
C2orf71	2.52971	0.116357	0.833259
EXO1	2.52971	0.116357	0.833259
OMA1	2.52971	0.116357	0.833259
PLCD4	2.52971	0.116357	0.833259
SYTL1	2.52971	0.116357	0.833259
ZDBF2	2.52971	0.116357	0.833259
CFAP57	0.367186	0.118324	0.833259
DCST1	0.367186	0.118324	0.833259
DPP4	0.367186	0.118324	0.833259
OBSL1	0.367186	0.118324	0.833259
MYO3B	1.91192	0.119813	0.833259
ABHD5	5.05707	0.122919	0.833259
AC013461.1	5.05707	0.122919	0.833259
ADCY3	5.05707	0.122919	0.833259
ATP6V1C2	5.05707	0.122919	0.833259
CD8B	5.05707	0.122919	0.833259
DNAJC8	5.05707	0.122919	0.833259
EXOSC7	5.05707	0.122919	0.833259
FBXW12	5.05707	0.122919	0.833259
FOXD2	5.05707	0.122919	0.833259
GORAB	5.05707	0.122919	0.833259
GPN1	5.05707	0.122919	0.833259
HES4	5.05707	0.122919	0.833259
IQCA1	5.05707	0.122919	0.833259
IQSEC1	5.05707	0.122919	0.833259
KHK	5.05707	0.122919	0.833259
KIDINS220	5.05707	0.122919	0.833259
LCE3D	5.05707	0.122919	0.833259
LEPR	5.05707	0.122919	0.833259
LRPPRC	5.05707	0.122919	0.833259
MMADHC	5.05707	0.122919	0.833259
MPC2	5.05707	0.122919	0.833259
MRPL20	5.05707	0.122919	0.833259
MRPL24	5.05707	0.122919	0.833259
MTX2	5.05707	0.122919	0.833259
NEU2	5.05707	0.122919	0.833259
PADI3	5.05707	0.122919	0.833259
PARP1	5.05707	0.122919	0.833259
PFKFB4	5.05707	0.122919	0.833259
PRKAR2A	5.05707	0.122919	0.833259
PRSS38	5.05707	0.122919	0.833259
PRSS45	5.05707	0.122919	0.833259
RAB11FIP5	5.05707	0.122919	0.833259
RTCA	5.05707	0.122919	0.833259
SDPR	5.05707	0.122919	0.833259
SH2D5	5.05707	0.122919	0.833259
SP9	5.05707	0.122919	0.833259
TADA3	5.05707	0.122919	0.833259
TAMM41	5.05707	0.122919	0.833259
TEKT2	5.05707	0.122919	0.833259
THEM5	5.05707	0.122919	0.833259
TNFRSF18	5.05707	0.122919	0.833259
XCL1	5.05707	0.122919	0.833259
ACKR1	0.168369	0.124931	0.833259
ARHGAP29	0.168369	0.124931	0.833259
C1orf106	0.168369	0.124931	0.833259
CAPN2	0.168369	0.124931	0.833259
CNPPD1	0.168369	0.124931	0.833259
CNR2	0.168369	0.124931	0.833259
FBXO48	0.168369	0.124931	0.833259
FCAMR	0.168369	0.124931	0.833259
FLVCR1	0.168369	0.124931	0.833259
FOXD4L1	0.168369	0.124931	0.833259
GABPB2	0.168369	0.124931	0.833259
IL36B	0.168369	0.124931	0.833259
ITGB3BP	0.168369	0.124931	0.833259
ITLN2	0.168369	0.124931	0.833259
OR10K1	0.168369	0.124931	0.833259
PPP1R1C	0.168369	0.124931	0.833259
RABIF	0.168369	0.124931	0.833259
RNF115	0.168369	0.124931	0.833259
SP140L	0.168369	0.124931	0.833259
TFB2M	0.168369	0.124931	0.833259
TMEM131	0.168369	0.124931	0.833259
TP53I3	0.168369	0.124931	0.833259
DNAH14	1.46311	0.139224	0.893913
LRRIQ3	2.22607	0.141137	0.893913
AGAP1	0.42073	0.143284	0.893913
RAD54L	0.42073	0.143284	0.893913
ABCB10	2.69789	0.143707	0.893913
BTBD19	2.69789	0.143707	0.893913
CYP4A11	2.69789	0.143707	0.893913
LAMC2	2.69789	0.143707	0.893913
MFF	2.69789	0.143707	0.893913
NUP210L	2.69789	0.143707	0.893913
WLS	2.69789	0.143707	0.893913
CCDC150	0.336642	0.145869	0.893913
EIF5B	0.336642	0.145869	0.893913
ERFE	0.336642	0.145869	0.893913
IDH1	0.336642	0.145869	0.893913
IL18R1	0.336642	0.145869	0.893913
MIB2	0.336642	0.145869	0.893913
ORC4	0.336642	0.145869	0.893913
RGPD1	0.336642	0.145869	0.893913
COL7A1	0.504824	0.151331	0.900529
FLG	0.74311	0.15798	0.900529
ALMS1	1.68701	0.16013	0.900529
ADAM15	2.0237	0.164574	0.900529
GJC2	2.0237	0.164574	0.900529
DOCK10	0.466069	0.166856	0.900529
ITGA10	0.466069	0.166856	0.900529
KIAA2012	0.466069	0.166856	0.900529
FSIP2	0.662255	0.168382	0.900529
LRIG2	2.27639	0.177062	0.900529
MTMR11	2.27639	0.177062	0.900529
VWA5B1	2.27639	0.177062	0.900529
CCDC121	3.03462	0.177236	0.900529
HAAO	3.03462	0.177236	0.900529
KLHDC8A	3.03462	0.177236	0.900529
LYPLAL1	3.03462	0.177236	0.900529
NDUFAF7	3.03462	0.177236	0.900529
NMS	3.03462	0.177236	0.900529
NUF2	3.03462	0.177236	0.900529
PPP1R21	3.03462	0.177236	0.900529
REN	3.03462	0.177236	0.900529
RRNAD1	3.03462	0.177236	0.900529
SLC9A2	3.03462	0.177236	0.900529
SSX2IP	3.03462	0.177236	0.900529
TAF1A	3.03462	0.177236	0.900529
TCTEX1D1	3.03462	0.177236	0.900529
TMEM87B	3.03462	0.177236	0.900529
TUFT1	3.03462	0.177236	0.900529
ZZZ3	3.03462	0.177236	0.900529
ATP1A4	0.403968	0.179404	0.900529
GCC2	0.403968	0.179404	0.900529
ZNF142	0.403968	0.179404	0.900529
ARHGEF10L	0.288645	0.179584	0.900529
BCAN	0.288645	0.179584	0.900529
CD46	0.288645	0.179584	0.900529
CERKL	0.288645	0.179584	0.900529
DNAJC16	0.288645	0.179584	0.900529
DUSP12	0.288645	0.179584	0.900529
EIF2AK3	0.288645	0.179584	0.900529
EMILIN1	0.288645	0.179584	0.900529
MARCO	0.288645	0.179584	0.900529
PAPOLG	0.288645	0.179584	0.900529
PGBD2	0.288645	0.179584	0.900529
PRAMEF1	0.288645	0.179584	0.900529
PRAMEF4	0.288645	0.179584	0.900529
SELP	0.288645	0.179584	0.900529
TTLL4	0.288645	0.179584	0.900529
UCN2	0.288645	0.179584	0.900529
ZC3H6	0.288645	0.179584	0.900529
CR2	0.504906	0.189001	0.900529
PASK	0.504906	0.189001	0.900529
DNMT3A	0.661274	0.192848	0.900529
NPHP4	1.77076	0.207305	0.900529
CA14	2.02336	0.20746	0.900529
GBP5	2.02336	0.20746	0.900529
HTR2B	2.02336	0.20746	0.900529
TTC21B	2.02336	0.20746	0.900529
VPS13D	2.02336	0.20746	0.900529
FANCD2	0.538565	0.209762	0.900529
PLCD1	0.459082	0.20992	0.900529
TTC21A	0.459082	0.20992	0.900529
ZMYM6	0.459082	0.20992	0.900529
AKR7A3	0.202077	0.218676	0.900529
ATP2B2	0.202077	0.218676	0.900529
ATRAID	0.202077	0.218676	0.900529
CATIP	0.202077	0.218676	0.900529
CCT4	0.202077	0.218676	0.900529
CDC42BPA	0.202077	0.218676	0.900529
CELSR3	0.202077	0.218676	0.900529
CYP1B1	0.202077	0.218676	0.900529
DENND1B	0.202077	0.218676	0.900529
DNM3	0.202077	0.218676	0.900529
DRAM2	0.202077	0.218676	0.900529
DYTN	0.202077	0.218676	0.900529
EFR3B	0.202077	0.218676	0.900529
EPHX4	0.202077	0.218676	0.900529
ERMAP	0.202077	0.218676	0.900529
FAM136A	0.202077	0.218676	0.900529
FAM229A	0.202077	0.218676	0.900529
FCRL1	0.202077	0.218676	0.900529
GBP3	0.202077	0.218676	0.900529
GIPC2	0.202077	0.218676	0.900529
GOLPH3L	0.202077	0.218676	0.900529
GPR89B	0.202077	0.218676	0.900529
HPDL	0.202077	0.218676	0.900529
OPRD1	0.202077	0.218676	0.900529
OR2G3	0.202077	0.218676	0.900529
OR2T12	0.202077	0.218676	0.900529
OR2T8	0.202077	0.218676	0.900529
PEF1	0.202077	0.218676	0.900529
PFKFB2	0.202077	0.218676	0.900529
PGD	0.202077	0.218676	0.900529
PHACTR4	0.202077	0.218676	0.900529
RSAD2	0.202077	0.218676	0.900529
TGOLN2	0.202077	0.218676	0.900529
TMOD4	0.202077	0.218676	0.900529
XYLB	0.202077	0.218676	0.900529
ZFP69	0.202077	0.218676	0.900529
ZNF514	0.202077	0.218676	0.900529
ANKRD65	2.3603	0.22391	0.900529
ATP8B2	2.3603	0.22391	0.900529
CD302	2.3603	0.22391	0.900529
CHIA	2.3603	0.22391	0.900529
CHRND	2.3603	0.22391	0.900529
DENND2C	2.3603	0.22391	0.900529
FAM178B	2.3603	0.22391	0.900529
FMO5	2.3603	0.22391	0.900529
IARS2	2.3603	0.22391	0.900529
MRPL37	2.3603	0.22391	0.900529
NUDT17	2.3603	0.22391	0.900529
RPAP2	2.3603	0.22391	0.900529
RUFY4	2.3603	0.22391	0.900529
ST7L	2.3603	0.22391	0.900529
STON1-GTF2A1L	2.3603	0.22391	0.900529
UGT1A8	2.3603	0.22391	0.900529
ZSWIM2	2.3603	0.22391	0.900529
BCS1L	0.378783	0.226427	0.900529
GBP4	0.378783	0.226427	0.900529
GON4L	0.378783	0.226427	0.900529
KIF17	0.378783	0.226427	0.900529
NIF3L1	0.378783	0.226427	0.900529
PAFAH2	0.378783	0.226427	0.900529
PIK3R3	0.378783	0.226427	0.900529
SEMA3B	0.378783	0.226427	0.900529
TUBA3E	0.378783	0.226427	0.900529
WDR78	0.378783	0.226427	0.900529
ANO7	1.68645	0.226702	0.900529
ADAMTSL4	1.85476	0.235125	0.931406
ITSN2	0.594003	0.24745	0.952567
OR2T27	1.73433	0.260341	0.952567
PARD3B	1.73433	0.260341	0.952567
USP40	1.73433	0.260341	0.952567
PCNX2	0.543831	0.262922	0.952567
PLA2R1	0.543831	0.262922	0.952567
ARMC9	2.02302	0.264084	0.952567
C2orf81	2.02302	0.264084	0.952567
CCDC17	2.02302	0.264084	0.952567
CD101	2.02302	0.264084	0.952567
DQX1	2.02302	0.264084	0.952567
FGGY	2.02302	0.264084	0.952567
GPR153	2.02302	0.264084	0.952567
PPM1B	2.02302	0.264084	0.952567
UGT1A9	2.02302	0.264084	0.952567
FAP	0.448921	0.26668	0.952567
NBEAL2	0.448921	0.26668	0.952567
NOC2L	0.448921	0.26668	0.952567
ODF2L	0.448921	0.26668	0.952567
SLC44A3	0.448921	0.26668	0.952567
SLC5A9	0.448921	0.26668	0.952567
ABCB6	1.64401	0.28339	0.952567
CFAP221	0.577125	0.285997	0.952567
ACTN2	2.52844	0.286317	0.952567
CAPG	2.52844	0.286317	0.952567
CDKL4	2.52844	0.286317	0.952567
CFHR1	2.52844	0.286317	0.952567
COBLL1	2.52844	0.286317	0.952567
DBT	2.52844	0.286317	0.952567
DYNC2LI1	2.52844	0.286317	0.952567
EHBP1	2.52844	0.286317	0.952567
GBP2	2.52844	0.286317	0.952567
GPD2	2.52844	0.286317	0.952567
HSD3B1	2.52844	0.286317	0.952567
IFRD2	2.52844	0.286317	0.952567
KLHL12	2.52844	0.286317	0.952567
LDLRAD2	2.52844	0.286317	0.952567
MON1A	2.52844	0.286317	0.952567
NT5C1B	2.52844	0.286317	0.952567
OSCP1	2.52844	0.286317	0.952567
OXNAD1	2.52844	0.286317	0.952567
PNPT1	2.52844	0.286317	0.952567
PSRC1	2.52844	0.286317	0.952567
RGSL1	2.52844	0.286317	0.952567
RP5-862P8.2	2.52844	0.286317	0.952567
RSG1	2.52844	0.286317	0.952567
SAG	2.52844	0.286317	0.952567
SCLY	2.52844	0.286317	0.952567
SEP15	2.52844	0.286317	0.952567
SFT2D3	2.52844	0.286317	0.952567
SPHKAP	2.52844	0.286317	0.952567
TACR1	2.52844	0.286317	0.952567
TMCO1	2.52844	0.286317	0.952567
TSPYL6	2.52844	0.286317	0.952567
USP4	2.52844	0.286317	0.952567
VPS54	2.52844	0.286317	0.952567
ZC3H8	2.52844	0.286317	0.952567
ZNF621	2.52844	0.286317	0.952567
ALDH4A1	0.336751	0.288959	0.952567
C2orf61	0.336751	0.288959	0.952567
CARF	0.336751	0.288959	0.952567
CD1B	0.336751	0.288959	0.952567
CLCA2	0.336751	0.288959	0.952567
CRNN	0.336751	0.288959	0.952567
CYP8B1	0.336751	0.288959	0.952567
FAM212B	0.336751	0.288959	0.952567
INPP5B	0.336751	0.288959	0.952567
LCLAT1	0.336751	0.288959	0.952567
NEMP2	0.336751	0.288959	0.952567
OSBPL6	0.336751	0.288959	0.952567
SNX7	0.336751	0.288959	0.952567
TTC30A	0.336751	0.288959	0.952567
ZNF124	0.336751	0.288959	0.952567
FLG2	1.47891	0.293174	0.956733
APLF	1.82073	0.298939	0.956733
ASB18	1.82073	0.298939	0.956733
CFAP74	1.82073	0.298939	0.956733
CHRNG	1.82073	0.298939	0.956733
CPSF3L	1.82073	0.298939	0.956733
MOGS	1.82073	0.298939	0.956733
SLC9C2	1.82073	0.298939	0.956733
TIE1	1.82073	0.298939	0.956733
ZNF697	1.82073	0.298939	0.956733
CNKSR1	0.50507	0.301564	0.956733
DTNB	0.50507	0.301564	0.956733
EPHA10	0.50507	0.301564	0.956733
IQGAP3	0.50507	0.301564	0.956733
PSD4	0.50507	0.301564	0.956733
TOR1AIP1	0.50507	0.301564	0.956733
UTP11	0.50507	0.301564	0.956733
PLB1	1.44556	0.307441	0.973224
AIM1L	1.68588	0.329461	0.981134
C2orf16	1.68588	0.329461	0.981134
C8A	1.68588	0.329461	0.981134
DYSF	1.68588	0.329461	0.981134
INSRR	1.68588	0.329461	0.981134
KCNH8	1.68588	0.329461	0.981134
CROCC	0.550983	0.332087	0.981134
FER1L5	0.550983	0.332087	0.981134
MACF1	0.550983	0.332087	0.981134
WDR3	0.550983	0.332087	0.981134
PDE4DIP	1.39136	0.333672	0.981134
ATG4C	2.02268	0.340978	0.981134
ATPAF1	2.02268	0.340978	0.981134
C1orf56	2.02268	0.340978	0.981134
CASP9	2.02268	0.340978	0.981134
CDK18	2.02268	0.340978	0.981134
CEP350	2.02268	0.340978	0.981134
CYP4B1	2.02268	0.340978	0.981134
FAM179A	2.02268	0.340978	0.981134
FASTKD2	2.02268	0.340978	0.981134
GALNT2	2.02268	0.340978	0.981134
GDAP2	2.02268	0.340978	0.981134
MATN3	2.02268	0.340978	0.981134
MED8	2.02268	0.340978	0.981134
MUTYH	2.02268	0.340978	0.981134
NCKAP1	2.02268	0.340978	0.981134
NIT1	2.02268	0.340978	0.981134
OXCT2	2.02268	0.340978	0.981134
PLEKHG5	2.02268	0.340978	0.981134
PRAMEF12	2.02268	0.340978	0.981134
RPF1	2.02268	0.340978	0.981134
SDE2	2.02268	0.340978	0.981134
SLAMF7	2.02268	0.340978	0.981134
THSD7B	2.02268	0.340978	0.981134
WDR6	2.02268	0.340978	0.981134
AMPD1	0.432961	0.34362	0.981134
C2orf74	0.432961	0.34362	0.981134
CPT2	0.432961	0.34362	0.981134
F5	0.432961	0.34362	0.981134
FAHD2B	0.432961	0.34362	0.981134
GPA33	0.432961	0.34362	0.981134
KLHL40	0.432961	0.34362	0.981134
LTBP1	0.432961	0.34362	0.981134
NFYC	0.432961	0.34362	0.981134
PIGF	0.432961	0.34362	0.981134
POTEI	0.432961	0.34362	0.981134
RNASEL	0.432961	0.34362	0.981134
TOR3A	0.432961	0.34362	0.981134
TTF2	0.432961	0.34362	0.981134
PDE11A	1.58955	0.356431	0.981134
SSUH2	0.589243	0.35904	0.981134
DLEC1	0.621618	0.383044	0.981134
ADGRF3	1.76987	0.384946	0.981134
BRDT	1.76987	0.384946	0.981134
CIB4	1.76987	0.384946	0.981134
COL6A3	1.76987	0.384946	0.981134
COLGALT2	1.76987	0.384946	0.981134
CRB1	1.76987	0.384946	0.981134
ELMOD3	1.76987	0.384946	0.981134
ERO1B	1.76987	0.384946	0.981134
PTGER3	1.76987	0.384946	0.981134
SLC26A9	1.76987	0.384946	0.981134
SMARCAL1	1.76987	0.384946	0.981134
TAF1B	1.76987	0.384946	0.981134
TGM4	1.76987	0.384946	0.981134
TRPM8	1.76987	0.384946	0.981134
VPS45	1.76987	0.384946	0.981134
ZYG11A	1.76987	0.384946	0.981134
CAPN7	0.505151	0.387542	0.981134
ERCC3	0.505151	0.387542	0.981134
GLB1L	0.505151	0.387542	0.981134
KANSL1L	0.505151	0.387542	0.981134
KLHL17	0.505151	0.387542	0.981134
MTMR14	0.505151	0.387542	0.981134
SLC22A14	0.505151	0.387542	0.981134
SRBD1	0.505151	0.387542	0.981134
SAMD11	1.46112	0.402035	0.981134
ATIC	1.61818	0.421245	0.981134
CAPN14	1.61818	0.421245	0.981134
CDK11A	1.61818	0.421245	0.981134
CLHC1	1.61818	0.421245	0.981134
DISC1	1.61818	0.421245	0.981134
JMJD4	1.61818	0.421245	0.981134
PADI4	1.61818	0.421245	0.981134
TAS1R1	1.61818	0.421245	0.981134
ZFAND2B	1.61818	0.421245	0.981134
COL16A1	1.41617	0.421534	0.981134
CNTN6	0.561276	0.423776	0.981134
LRRFIP2	0.561276	0.423776	0.981134
MSH6	0.561276	0.423776	0.981134
PIKFYVE	0.561276	0.423776	0.981134
PPFIA4	0.561276	0.423776	0.981134
SLC1A7	0.561276	0.423776	0.981134
ZKSCAN7	0.561276	0.423776	0.981134
COL4A3	0.673417	0.424048	0.981134
SLC6A20	0.673417	0.424048	0.981134
TCHH	1.37939	0.439264	0.981134
AGRN	2.02234	0.450522	0.981134
ANKRD23	2.02234	0.450522	0.981134
BLZF1	2.02234	0.450522	0.981134
C1orf141	2.02234	0.450522	0.981134
C2orf68	2.02234	0.450522	0.981134
CD84	2.02234	0.450522	0.981134
CELA2A	2.02234	0.450522	0.981134
CGREF1	2.02234	0.450522	0.981134
CPNE9	2.02234	0.450522	0.981134
CPSF3	2.02234	0.450522	0.981134
CRYZ	2.02234	0.450522	0.981134
CTSE	2.02234	0.450522	0.981134
CYB5RL	2.02234	0.450522	0.981134
DAB1	2.02234	0.450522	0.981134
DFNB59	2.02234	0.450522	0.981134
DMAP1	2.02234	0.450522	0.981134
EHD3	2.02234	0.450522	0.981134
EPB41	2.02234	0.450522	0.981134
EPHA2	2.02234	0.450522	0.981134
EPRS	2.02234	0.450522	0.981134
FAHD2A	2.02234	0.450522	0.981134
FAM177B	2.02234	0.450522	0.981134
FLAD1	2.02234	0.450522	0.981134
FNDC7	2.02234	0.450522	0.981134
FSHR	2.02234	0.450522	0.981134
GJB3	2.02234	0.450522	0.981134
IKBKE	2.02234	0.450522	0.981134
IL1RL2	2.02234	0.450522	0.981134
KDM1A	2.02234	0.450522	0.981134
KIF2C	2.02234	0.450522	0.981134
KPRP	2.02234	0.450522	0.981134
LGALS8	2.02234	0.450522	0.981134
LIMS2	2.02234	0.450522	0.981134
MAN1A2	2.02234	0.450522	0.981134
METTL21A	2.02234	0.450522	0.981134
MIGA1	2.02234	0.450522	0.981134
MOGAT1	2.02234	0.450522	0.981134
MTX1	2.02234	0.450522	0.981134
NCKAP5	2.02234	0.450522	0.981134
NEURL3	2.02234	0.450522	0.981134
NOL9	2.02234	0.450522	0.981134
OR2L2	2.02234	0.450522	0.981134
OR2L5	2.02234	0.450522	0.981134
OR6K2	2.02234	0.450522	0.981134
PERM1	2.02234	0.450522	0.981134
PIGM	2.02234	0.450522	0.981134
PLXNB1	2.02234	0.450522	0.981134
PPP1R12B	2.02234	0.450522	0.981134
PRAMEF20	2.02234	0.450522	0.981134
PRR21	2.02234	0.450522	0.981134
PRSS50	2.02234	0.450522	0.981134
PSME4	2.02234	0.450522	0.981134
PUM1	2.02234	0.450522	0.981134
RAPGEF4	2.02234	0.450522	0.981134
RBM43	2.02234	0.450522	0.981134
RIMKLA	2.02234	0.450522	0.981134
RNF19B	2.02234	0.450522	0.981134
RP11-201K10.3	2.02234	0.450522	0.981134
RPL22	2.02234	0.450522	0.981134
SCAP	2.02234	0.450522	0.981134
SCRN3	2.02234	0.450522	0.981134
SLC5A6	2.02234	0.450522	0.981134
SOWAHC	2.02234	0.450522	0.981134
TANC1	2.02234	0.450522	0.981134
TAS1R2	2.02234	0.450522	0.981134
TMEM237	2.02234	0.450522	0.981134
TMEM88B	2.02234	0.450522	0.981134
TOPAZ1	2.02234	0.450522	0.981134
TRAF5	2.02234	0.450522	0.981134
TTC30B	2.02234	0.450522	0.981134
ALS2	1.51705	0.451843	0.981134
ADAMTS4	0.404165	0.453038	0.981134
AMPD2	0.404165	0.453038	0.981134
AMY2A	0.404165	0.453038	0.981134
AP4B1	0.404165	0.453038	0.981134
AQP10	0.404165	0.453038	0.981134
AQP12B	0.404165	0.453038	0.981134
BCL2L15	0.404165	0.453038	0.981134
CAPZA1	0.404165	0.453038	0.981134
CD55	0.404165	0.453038	0.981134
CHIT1	0.404165	0.453038	0.981134
CNNM3	0.404165	0.453038	0.981134
CREG1	0.404165	0.453038	0.981134
CRELD1	0.404165	0.453038	0.981134
CYP2J2	0.404165	0.453038	0.981134
DRC1	0.404165	0.453038	0.981134
DUSP11	0.404165	0.453038	0.981134
EDAR	0.404165	0.453038	0.981134
EPHB2	0.404165	0.453038	0.981134
FAM228A	0.404165	0.453038	0.981134
FCRL2	0.404165	0.453038	0.981134
FCRL5	0.404165	0.453038	0.981134
FCRLB	0.404165	0.453038	0.981134
FIGLA	0.404165	0.453038	0.981134
GBP1	0.404165	0.453038	0.981134
GLMP	0.404165	0.453038	0.981134
GLRX2	0.404165	0.453038	0.981134
HOXD11	0.404165	0.453038	0.981134
IQCC	0.404165	0.453038	0.981134
LRRC52	0.404165	0.453038	0.981134
OR2B11	0.404165	0.453038	0.981134
PALMD	0.404165	0.453038	0.981134
PAQR7	0.404165	0.453038	0.981134
PLEKHM2	0.404165	0.453038	0.981134
PMF1	0.404165	0.453038	0.981134
POTEE	0.404165	0.453038	0.981134
PRAMEF15	0.404165	0.453038	0.981134
SNTG2	0.404165	0.453038	0.981134
STAMBP	0.404165	0.453038	0.981134
TSSK3	0.404165	0.453038	0.981134
ZNF593	0.404165	0.453038	0.981134
ANKRD53	0.606176	0.454305	0.981134
CC2D1B	0.606176	0.454305	0.981134
MASP2	0.606176	0.454305	0.981134
EFHB	1.44482	0.478079	0.986523
SH3D21	1.44482	0.478079	0.986523
URB2	1.44482	0.478079	0.986523
TTLL3	0.642911	0.480471	0.986523
MROH7	1.39065	0.500892	0.986523
NBPF1	1.39065	0.500892	0.986523
PATJ	1.39065	0.500892	0.986523
ABCG8	1.68531	0.505359	0.986523
AGBL5	1.68531	0.505359	0.986523
AGMAT	1.68531	0.505359	0.986523
ATP13A2	1.68531	0.505359	0.986523
C2CD4D	1.68531	0.505359	0.986523
CD48	1.68531	0.505359	0.986523
CFHR5	1.68531	0.505359	0.986523
CFLAR	1.68531	0.505359	0.986523
CNTN2	1.68531	0.505359	0.986523
EIF2B4	1.68531	0.505359	0.986523
ENTPD3	1.68531	0.505359	0.986523
FAM151A	1.68531	0.505359	0.986523
FCGR1A	1.68531	0.505359	0.986523
FMO2	1.68531	0.505359	0.986523
FPGT	1.68531	0.505359	0.986523
GGCX	1.68531	0.505359	0.986523
GPATCH3	1.68531	0.505359	0.986523
GRB14	1.68531	0.505359	0.986523
H6PD	1.68531	0.505359	0.986523
IRS1	1.68531	0.505359	0.986523
KDM5B	1.68531	0.505359	0.986523
MCOLN3	1.68531	0.505359	0.986523
MPZL1	1.68531	0.505359	0.986523
MRPS9	1.68531	0.505359	0.986523
NEUROD1	1.68531	0.505359	0.986523
NMI	1.68531	0.505359	0.986523
OR2W3	1.68531	0.505359	0.986523
OR6F1	1.68531	0.505359	0.986523
PADI1	1.68531	0.505359	0.986523
PIP5K1A	1.68531	0.505359	0.986523
PODN	1.68531	0.505359	0.986523
RERE	1.68531	0.505359	0.986523
RIT1	1.68531	0.505359	0.986523
RXFP4	1.68531	0.505359	0.986523
SERINC2	1.68531	0.505359	0.986523
SPOCD1	1.68531	0.505359	0.986523
TTC27	1.68531	0.505359	0.986523
UQCRC1	1.68531	0.505359	0.986523
WDR54	1.68531	0.505359	0.986523
ZFP69B	1.68531	0.505359	0.986523
ACOT11	0.505233	0.507709	0.986523
C3orf62	0.505233	0.507709	0.986523
CAND2	0.505233	0.507709	0.986523
CCDC148	0.505233	0.507709	0.986523
CCDC30	0.505233	0.507709	0.986523
CLCNKA	0.505233	0.507709	0.986523
CRIM1	0.505233	0.507709	0.986523
CYP4Z1	0.505233	0.507709	0.986523
DHX57	0.505233	0.507709	0.986523
ECEL1	0.505233	0.507709	0.986523
FRRS1	0.505233	0.507709	0.986523
GPR89A	0.505233	0.507709	0.986523
HYI	0.505233	0.507709	0.986523
ITGA6	0.505233	0.507709	0.986523
KLHDC7A	0.505233	0.507709	0.986523
LDAH	0.505233	0.507709	0.986523
NLRC4	0.505233	0.507709	0.986523
PADI6	0.505233	0.507709	0.986523
PPM1J	0.505233	0.507709	0.986523
PREPL	0.505233	0.507709	0.986523
PROM2	0.505233	0.507709	0.986523
PRSS42	0.505233	0.507709	0.986523
PTPN7	0.505233	0.507709	0.986523
SPAG16	0.505233	0.507709	0.986523
STPG1	0.505233	0.507709	0.986523
TRAIP	0.505233	0.507709	0.986523
ZNF670	0.505233	0.507709	0.986523
LRRC71	1.34851	0.520962	1
CLCNKB	0.699428	0.523223	1
MEGF6	1.31481	0.538797	1
ANXA9	1.5168	0.546506	1
BECN2	1.5168	0.546506	1
CFAP45	1.5168	0.546506	1
CYP20A1	1.5168	0.546506	1
DAP3	1.5168	0.546506	1
GBP6	1.5168	0.546506	1
HIST2H3D	1.5168	0.546506	1
IVL	1.5168	0.546506	1
KIF14	1.5168	0.546506	1
KRTCAP3	1.5168	0.546506	1
MYOC	1.5168	0.546506	1
OR2T34	1.5168	0.546506	1
PADI2	1.5168	0.546506	1
PMS1	1.5168	0.546506	1
POMGNT1	1.5168	0.546506	1
PTH2R	1.5168	0.546506	1
RBM34	1.5168	0.546506	1
RETSAT	1.5168	0.546506	1
RMDN2	1.5168	0.546506	1
RNPEP	1.5168	0.546506	1
SLC30A7	1.5168	0.546506	1
SMPD4	1.5168	0.546506	1
SP110	1.5168	0.546506	1
SSFA2	1.5168	0.546506	1
TTC7A	1.5168	0.546506	1
ACKR2	0.577405	0.548709	1
ASTL	0.577405	0.548709	1
CDC20	0.577405	0.548709	1
CDCA8	0.577405	0.548709	1
CNST	0.577405	0.548709	1
CPS1	0.577405	0.548709	1
FAM131C	0.577405	0.548709	1
IFI44	0.577405	0.548709	1
MPL	0.577405	0.548709	1
RAD18	0.577405	0.548709	1
RAVER2	0.577405	0.548709	1
SCTR	0.577405	0.548709	1
SGO1	0.577405	0.548709	1
SLC4A1AP	0.577405	0.548709	1
TDRKH	0.577405	0.548709	1
TRAF3IP1	0.577405	0.548709	1
ZNF692	0.577405	0.548709	1
AXDND1	1.28723	0.55478	1
TARBP1	1.28723	0.55478	1
XIRP2	0.81587	0.559575	1
XIRP1	1.26425	0.569211	1
COL24A1	0.757712	0.571301	1
FASTKD1	1.41569	0.578845	1
GOLGA4	1.41569	0.578845	1
LRP2	1.41569	0.578845	1
NBPF9	1.41569	0.578845	1
TBC1D5	1.41569	0.578845	1
TLR5	1.41569	0.578845	1
ARHGEF16	0.631533	0.580922	1
CAPN13	0.631533	0.580922	1
DALRD3	0.631533	0.580922	1
LTF	0.631533	0.580922	1
PIGV	0.631533	0.580922	1
PRELP	0.631533	0.580922	1
SLC35F5	0.631533	0.580922	1
ZNF620	0.631533	0.580922	1
ALS2CR12	1.34828	0.605124	1
CDK15	1.34828	0.605124	1
DDX20	1.34828	0.605124	1
FAM129A	1.34828	0.605124	1
FMO4	1.34828	0.605124	1
KIAA1522	1.34828	0.605124	1
NVL	1.34828	0.605124	1
TMEM206	1.34828	0.605124	1
ABCG5	0.673633	0.607094	1
FAM198A	1.30014	0.627026	1
HSPG2	1.30014	0.627026	1
THADA	1.30014	0.627026	1
PER3	0.707312	0.628902	1
ADCY10	1.26403	0.645644	1
RNF207	1.26403	0.645644	1
DPYD	0.734868	0.647439	1
RESP18	0.734868	0.647439	1
SCN11A	0.734868	0.647439	1
WDR35	0.734868	0.647439	1
MYO7B	1.23594	0.661724	1
CGN	0.757832	0.663446	1
CHD1L	0.757832	0.663446	1
USH2A	0.854859	0.665065	1
FARP2	1.21348	0.675794	1
RAD51AP2	1.21348	0.675794	1
SCNN1D	0.777263	0.677452	1
A3GALT2	0.505315	0.687451	1
AADACL3	0.505315	0.687451	1
AC010731.4	0.505315	0.687451	1
ACMSD	0.505315	0.687451	1
ADAM17	0.505315	0.687451	1
AHCTF1	0.505315	0.687451	1
ALLC	0.505315	0.687451	1
AMT	0.505315	0.687451	1
APITD1	0.505315	0.687451	1
ATG4B	0.505315	0.687451	1
B3GALT6	0.505315	0.687451	1
BARD1	0.505315	0.687451	1
BUB1	0.505315	0.687451	1
C1orf146	0.505315	0.687451	1
CCDC185	0.505315	0.687451	1
CCDC88A	0.505315	0.687451	1
CHCHD5	0.505315	0.687451	1
CHL1	0.505315	0.687451	1
CHPF	0.505315	0.687451	1
CLIP4	0.505315	0.687451	1
CYP4X1	0.505315	0.687451	1
DNAJC11	0.505315	0.687451	1
DPH2	0.505315	0.687451	1
EGR4	0.505315	0.687451	1
ENO1	0.505315	0.687451	1
EPHA8	0.505315	0.687451	1
FAM134A	0.505315	0.687451	1
FBXO36	0.505315	0.687451	1
FCGR2C	0.505315	0.687451	1
FMNL2	0.505315	0.687451	1
FOXD3	0.505315	0.687451	1
FOXE3	0.505315	0.687451	1
GHRL	0.505315	0.687451	1
GJA9	0.505315	0.687451	1
GKN2	0.505315	0.687451	1
GPATCH2	0.505315	0.687451	1
GPR148	0.505315	0.687451	1
GPR157	0.505315	0.687451	1
GYPC	0.505315	0.687451	1
HHAT	0.505315	0.687451	1
HNRNPLL	0.505315	0.687451	1
HOXD1	0.505315	0.687451	1
IBA57	0.505315	0.687451	1
IL1A	0.505315	0.687451	1
IPP	0.505315	0.687451	1
ITGA9	0.505315	0.687451	1
LACTBL1	0.505315	0.687451	1
MAGI3	0.505315	0.687451	1
MATN1	0.505315	0.687451	1
MFSD9	0.505315	0.687451	1
MIA3	0.505315	0.687451	1
MRPL9	0.505315	0.687451	1
NAGK	0.505315	0.687451	1
NOL10	0.505315	0.687451	1
OSGEPL1	0.505315	0.687451	1
P4HTM	0.505315	0.687451	1
PAQR6	0.505315	0.687451	1
PEX13	0.505315	0.687451	1
PGLYRP4	0.505315	0.687451	1
PIK3C2B	0.505315	0.687451	1
PKDCC	0.505315	0.687451	1
PPOX	0.505315	0.687451	1
PRPF3	0.505315	0.687451	1
PTH1R	0.505315	0.687451	1
PTPN14	0.505315	0.687451	1
RASSF5	0.505315	0.687451	1
RBM44	0.505315	0.687451	1
RFTN1	0.505315	0.687451	1
RP11-287D1.3	0.505315	0.687451	1
RP11-96L14.8	0.505315	0.687451	1
RPS6KC1	0.505315	0.687451	1
RSC1A1	0.505315	0.687451	1
SLAMF9	0.505315	0.687451	1
SLC35E2	0.505315	0.687451	1
SNAPIN	0.505315	0.687451	1
SRSF11	0.505315	0.687451	1
SULT1C2	0.505315	0.687451	1
SYDE2	0.505315	0.687451	1
TATDN3	0.505315	0.687451	1
TBX19	0.505315	0.687451	1
TDRD5	0.505315	0.687451	1
TMEM54	0.505315	0.687451	1
TNFAIP6	0.505315	0.687451	1
TTL	0.505315	0.687451	1
WDR47	0.505315	0.687451	1
L1TD1	1.1951	0.688241	1
AGL	0.793918	0.689842	1
WDR43	0.793918	0.689842	1
IGFN1	1.17978	0.699354	1
IFIH1	1.16682	0.709356	1
ABL2	1.34805	0.725037	1
ASIC4	1.34805	0.725037	1
ATF6	1.34805	0.725037	1
BPNT1	1.34805	0.725037	1
C1orf109	1.34805	0.725037	1
C1orf87	1.34805	0.725037	1
CAMK1	1.34805	0.725037	1
CASQ2	1.34805	0.725037	1
CCR5	1.34805	0.725037	1
CDCP1	1.34805	0.725037	1
CNTN4	1.34805	0.725037	1
CPO	1.34805	0.725037	1
CYS1	1.34805	0.725037	1
DCAF17	1.34805	0.725037	1
DCDC2C	1.34805	0.725037	1
EIF2AK2	1.34805	0.725037	1
EXTL2	1.34805	0.725037	1
FAM126B	1.34805	0.725037	1
FANCL	1.34805	0.725037	1
FH	1.34805	0.725037	1
GALM	1.34805	0.725037	1
ICA1L	1.34805	0.725037	1
IL17RC	1.34805	0.725037	1
KIAA2013	1.34805	0.725037	1
KIFAP3	1.34805	0.725037	1
LAX1	1.34805	0.725037	1
LGR6	1.34805	0.725037	1
LOXL3	1.34805	0.725037	1
LRP1B	1.34805	0.725037	1
MAB21L3	1.34805	0.725037	1
MAEL	1.34805	0.725037	1
MBOAT2	1.34805	0.725037	1
MTHFR	1.34805	0.725037	1
MYBPH	1.34805	0.725037	1
NBPF4	1.34805	0.725037	1
NDUFA10	1.34805	0.725037	1
NRDC	1.34805	0.725037	1
OR2G6	1.34805	0.725037	1
OTUD3	1.34805	0.725037	1
PIGK	1.34805	0.725037	1
PLOD1	1.34805	0.725037	1
QSOX1	1.34805	0.725037	1
REG1B	1.34805	0.725037	1
RNF223	1.34805	0.725037	1
SLC16A1	1.34805	0.725037	1
SLC25A12	1.34805	0.725037	1
SLFNL1	1.34805	0.725037	1
SMG7	1.34805	0.725037	1
TRAK1	1.34805	0.725037	1
TRIM54	1.34805	0.725037	1
TYW5	1.34805	0.725037	1
UBXN2A	1.34805	0.725037	1
UGGT1	1.34805	0.725037	1
UGT1A5	1.34805	0.725037	1
VPS72	1.34805	0.725037	1
ZNF197	1.34805	0.725037	1
ZNF638	1.34805	0.725037	1
ZNF669	1.34805	0.725037	1
CCDC142	0.606371	0.726505	1
COQ8A	0.606371	0.726505	1
DRAXIN	0.606371	0.726505	1
EPHX1	0.606371	0.726505	1
FEZ2	0.606371	0.726505	1
FMO3	0.606371	0.726505	1
FN1	0.606371	0.726505	1
GLB1	0.606371	0.726505	1
GSTM2	0.606371	0.726505	1
GTDC1	0.606371	0.726505	1
HHATL	0.606371	0.726505	1
HMGCS2	0.606371	0.726505	1
KLHL21	0.606371	0.726505	1
LMAN2L	0.606371	0.726505	1
MLH1	0.606371	0.726505	1
NPHP1	0.606371	0.726505	1
NR1I3	0.606371	0.726505	1
PM20D1	0.606371	0.726505	1
S100A2	0.606371	0.726505	1
SFTPB	0.606371	0.726505	1
SLC6A9	0.606371	0.726505	1
SOAT1	0.606371	0.726505	1
SUCO	0.606371	0.726505	1
TFAP2E	0.606371	0.726505	1
THUMPD3	0.606371	0.726505	1
TRABD2A	0.606371	0.726505	1
TRAF3IP3	0.606371	0.726505	1
UGT1A3	0.606371	0.726505	1
ZNF501	0.606371	0.726505	1
ZSWIM5	0.606371	0.726505	1
ABCA12	1.26381	0.75252	1
ALK	1.26381	0.75252	1
AMER3	1.26381	0.75252	1
BEST4	1.26381	0.75252	1
CCDC13	1.26381	0.75252	1
CCR2	1.26381	0.75252	1
COL4A4	1.26381	0.75252	1
ETAA1	1.26381	0.75252	1
FAM161A	1.26381	0.75252	1
GBP7	1.26381	0.75252	1
GPATCH11	1.26381	0.75252	1
IAH1	1.26381	0.75252	1
KCTD3	1.26381	0.75252	1
LAD1	1.26381	0.75252	1
LHCGR	1.26381	0.75252	1
NKTR	1.26381	0.75252	1
PGAP1	1.26381	0.75252	1
PRAMEF10	1.26381	0.75252	1
SH3YL1	1.26381	0.75252	1
STON1	1.26381	0.75252	1
TAS1R3	1.26381	0.75252	1
TMED5	1.26381	0.75252	1
TRAK2	1.26381	0.75252	1
UBR4	1.26381	0.75252	1
XRCC5	1.26381	0.75252	1
ANXA4	0.67374	0.753841	1
ATP6V1B1	0.67374	0.753841	1
BTBD8	0.67374	0.753841	1
CDCP2	0.67374	0.753841	1
CEP85	0.67374	0.753841	1
CPTP	0.67374	0.753841	1
DISP3	0.67374	0.753841	1
DNALI1	0.67374	0.753841	1
EDEM1	0.67374	0.753841	1
EMC1	0.67374	0.753841	1
ESPN	0.67374	0.753841	1
FCRL4	0.67374	0.753841	1
FOXO6	0.67374	0.753841	1
GADL1	0.67374	0.753841	1
HCRTR1	0.67374	0.753841	1
HECTD3	0.67374	0.753841	1
IL17RE	0.67374	0.753841	1
KLHL41	0.67374	0.753841	1
LAMB2	0.67374	0.753841	1
MROH2A	0.67374	0.753841	1
PAPPA2	0.67374	0.753841	1
SEPN1	0.67374	0.753841	1
SUCLG1	0.67374	0.753841	1
TARS2	0.67374	0.753841	1
TBCE	0.67374	0.753841	1
TMIE	0.67374	0.753841	1
WDR64	0.67374	0.753841	1
DNAH7	0.884142	0.76572	1
AMY2B	1.21327	0.773131	1
ANKRD35	1.21327	0.773131	1
ATAD3C	1.21327	0.773131	1
CAPN8	1.21327	0.773131	1
CCDC141	1.21327	0.773131	1
CCDC173	1.21327	0.773131	1
MERTK	1.21327	0.773131	1
OLFML3	1.21327	0.773131	1
PEAR1	1.21327	0.773131	1
POLR1A	1.21327	0.773131	1
PTPN18	1.21327	0.773131	1
PTPN23	1.21327	0.773131	1
SP140	1.21327	0.773131	1
THBS3	1.21327	0.773131	1
TRMT61B	1.21327	0.773131	1
ALS2CL	0.721861	0.774343	1
CACNA1S	0.721861	0.774343	1
DNPEP	0.721861	0.774343	1
GALNT3	0.721861	0.774343	1
IFI16	0.721861	0.774343	1
PUS10	0.721861	0.774343	1
SEMA4A	0.721861	0.774343	1
SLC25A34	0.721861	0.774343	1
SLC45A1	0.721861	0.774343	1
CACHD1	1.17957	0.789324	1
CCDC138	1.17957	0.789324	1
GTF3C3	1.17957	0.789324	1
LPIN1	1.17957	0.789324	1
NID1	1.17957	0.789324	1
TBC1D8	1.17957	0.789324	1
AVPR1B	0.757952	0.79045	1
DNAJC10	0.757952	0.79045	1
UNC80	0.757952	0.79045	1
CAPN10	1.1555	0.802481	1
GPAT2	1.1555	0.802481	1
MAP3K19	1.1555	0.802481	1
PTPN22	1.1555	0.802481	1
SETMAR	1.1555	0.802481	1
SP100	1.1555	0.802481	1
UBA7	1.1555	0.802481	1
ULK4	1.1555	0.802481	1
MAP10	0.786023	0.803536	1
RFX8	0.786023	0.803536	1
GCKR	1.13745	0.813444	1
PRG4	1.13745	0.813444	1
SCN9A	1.13745	0.813444	1
ANKAR	1.12341	0.822763	1
ARHGEF4	1.12341	0.822763	1
PLEKHH2	1.12341	0.822763	1
TESK2	1.12341	0.822763	1
LAMB3	0.826854	0.82371	1
AOX1	1.11218	0.83081	1
ERICH3	1.11218	0.83081	1
HMCN1	1.11218	0.83081	1
MTIF2	0.842166	0.831714	1
HFM1	1.07846	0.859178	1
NBEAL1	0.891708	0.859932	1
NEB	0.909557	0.871286	1
ASPM	0.918755	0.877479	1
HRNR	0.940898	0.893696	1
OBSCN	1.03413	0.915475	1
ANKRD36	1.01094	1	1
NBAS	1.01092	1	1
XDH	0.943356	1	1
ABHD1	0.842296	1	1
ACAA1	1.0109	1	1
ACADM	1.0109	1	1
ACP1	1.0109	1	1
ADAM30	1.0109	1	1
ADGRL4	0.758072	1	1
AGXT	1.0109	1	1
ALG6	0.758072	1	1
ALPL	1.0109	1	1
ALPP	1.0109	1	1
ALPPL2	1.01091	1	1
ALS2CR11	1.01092	1	1
ANGEL2	1.0109	1	1
ANGPTL3	0.758072	1	1
ANO10	1.01091	1	1
APOB	0.866361	1	1
ASB17	1.0109	1	1
ASNSD1	0.842296	1	1
ATRIP	0.866361	1	1
AUNIP	1.0109	1	1
B3GALNT2	0.808606	1	1
BAZ2B	0.758072	1	1
BCAR3	0.758072	1	1
BCL9	0.758072	1	1
BNIPL	0.808606	1	1
BOK	0.808606	1	1
BROX	0.842296	1	1
BTD	1.0109	1	1
C1D	1.0109	1	1
C1GALT1C1L	1.0109	1	1
C1orf111	1.0109	1	1
C1orf123	1.01091	1	1
C1orf127	0.909692	1	1
C1orf43	0.758072	1	1
C1orf94	0.758072	1	1
C3orf20	1.01091	1	1
CACYBP	1.0109	1	1
CAPN9	1.0109	1	1
CASQ1	0.808606	1	1
CATSPER4	1.0109	1	1
CCDC140	0.842296	1	1
CCDC18	0.89845	1	1
CCDC181	0.842296	1	1
CCDC28B	1.0109	1	1
CCDC74A	1.0109	1	1
CCDC74B	0.866361	1	1
CCDC93	0.808606	1	1
CD1D	1.01091	1	1
CD1E	0.808606	1	1
CDHR4	1.01091	1	1
CEBPZ	1.01091	1	1
CENPO	1.0109	1	1
CEP104	1.01091	1	1
CFAP65	1.01092	1	1
CHRNA1	1.0109	1	1
CHRNB2	1.0109	1	1
CIART	0.758072	1	1
CIR1	1.01091	1	1
CLCA1	1.0109	1	1
CLCN6	0.808606	1	1
CLEC4F	1.01091	1	1
CLK1	0.758072	1	1
CLSPN	0.758072	1	1
CLSTN1	1.0109	1	1
CMC1	1.0109	1	1
CMPK1	1.01091	1	1
CMTM7	1.0109	1	1
CNNM4	1.0109	1	1
COG2	1.01091	1	1
COL11A1	0.842296	1	1
CR1	0.926555	1	1
CR1L	1.01091	1	1
CRCT1	1.0109	1	1
CREG2	1.0109	1	1
CROCC2	0.91889	1	1
CRYGB	0.758072	1	1
CSF3R	1.0109	1	1
CYP4A22	1.0109	1	1
DARS	1.0109	1	1
DARS2	1.0109	1	1
DCDC2B	0.758072	1	1
DDR2	1.0109	1	1
DENND4B	1.0109	1	1
DFFB	0.758072	1	1
DGKD	1.0109	1	1
DIEXF	1.0109	1	1
DIS3L2	1.0109	1	1
DNASE2B	1.0109	1	1
DNTTIP2	0.842296	1	1
DOCK7	0.842296	1	1
DTL	0.758072	1	1
ECM1	1.01091	1	1
EPCAM	1.0109	1	1
EPS8L3	1.01091	1	1
ESPNL	0.866361	1	1
EVA1B	1.0109	1	1
EVI5	0.758072	1	1
EVX2	1.0109	1	1
EXOC6B	0.758072	1	1
EXOG	0.758072	1	1
EXOSC10	1.0109	1	1
EXTL1	0.808606	1	1
EYA3	1.0109	1	1
F13B	1.0109	1	1
FAM124B	0.866361	1	1
FAM132A	0.842296	1	1
FAM167B	1.0109	1	1
FAM71A	0.808606	1	1
FBXO2	1.0109	1	1
FCGR2A	1.0109	1	1
FCGR2B	0.758072	1	1
FCRL3	0.758072	1	1
FHAD1	1.01091	1	1
FYCO1	0.909692	1	1
GALNT14	0.866361	1	1
GCFC2	1.01091	1	1
GDF7	0.808606	1	1
GEN1	1.01091	1	1
GJB4	1.0109	1	1
GMPPA	0.758072	1	1
GNL2	0.758072	1	1
GPATCH4	0.808606	1	1
GPR1	1.0109	1	1
GPR161	1.0109	1	1
GPR75	0.758072	1	1
GSTM5	0.808606	1	1
HACL1	0.88441	1	1
HADHA	0.808606	1	1
HADHB	1.0109	1	1
HAO2	1.0109	1	1
HEATR1	1.0109	1	1
HEATR5B	0.909692	1	1
HHIPL2	0.909692	1	1
HIVEP3	0.808606	1	1
HS1BP3	0.758072	1	1
IL36G	1.01091	1	1
IMMT	0.758072	1	1
IRAK2	0.758072	1	1
ITGA4	0.808606	1	1
ITGB6	0.808606	1	1
ITLN1	1.0109	1	1
ITPR1	1.0109	1	1
ITPRIPL1	0.808606	1	1
KANK4	0.758072	1	1
KDM3A	0.758072	1	1
KIAA1211L	1.0109	1	1
KIAA1324	1.0109	1	1
KIAA1614	0.89845	1	1
KIF15	1.01091	1	1
KIF9	0.842296	1	1
KLHL30	0.758072	1	1
KMO	0.758072	1	1
KYNU	1.0109	1	1
LARS2	0.866361	1	1
LDLRAD1	1.0109	1	1
LDLRAP1	0.758072	1	1
LNPK	0.808606	1	1
LRIF1	0.758072	1	1
LRRC42	0.909692	1	1
LUZP1	0.758072	1	1
LY75	1.01092	1	1
MAP4K3	0.758072	1	1
MAST2	1.01091	1	1
MDH1	1.0109	1	1
METTL8	0.808606	1	1
MFSD2B	1.01091	1	1
MKRN2	1.0109	1	1
MLPH	1.0109	1	1
MPP4	1.01091	1	1
MREG	1.0109	1	1
MROH9	0.758072	1	1
MSH4	0.808606	1	1
MSTO1	1.01091	1	1
MTOR	0.758072	1	1
NADK	0.866361	1	1
NAT8B	1.0109	1	1
NAXE	1.0109	1	1
NBPF14	1.0109	1	1
NBPF26	1.0109	1	1
NBPF3	0.842296	1	1
NDUFS1	1.0109	1	1
NEXN	1.0109	1	1
NIFK	0.808606	1	1
NMUR1	1.0109	1	1
NOP58	1.01091	1	1
NPHS2	0.758072	1	1
NPPB	1.0109	1	1
NPR1	0.758072	1	1
NR5A2	0.758072	1	1
NTRK1	1.0109	1	1
NUAK2	1.01091	1	1
OLFML2B	0.88441	1	1
OPTC	0.758072	1	1
OR2L13	0.758072	1	1
OR2M4	1.0109	1	1
OR2T10	1.0109	1	1
OR2T11	1.0109	1	1
OR2T35	1.01091	1	1
ORC2	1.0109	1	1
PBXIP1	0.758072	1	1
PCYOX1	1.0109	1	1
PDK1	0.808606	1	1
PDZK1	1.0109	1	1
PECR	1.01091	1	1
PER2	0.758072	1	1
PEX19	0.758072	1	1
PGM1	1.0109	1	1
PIGC	0.758072	1	1
PKP4	1.0109	1	1
PLEKHN1	1.01091	1	1
PLK3	1.0109	1	1
PLXNA2	1.0109	1	1
POLR3C	0.866361	1	1
PP2D1	1.01091	1	1
PPP2R5A	0.89845	1	1
PPP4R3B	0.758072	1	1
PRAMEF11	0.758072	1	1
PRAMEF19	0.758072	1	1
PRKAA2	0.808606	1	1
PRKAG3	1.0109	1	1
PRRC2C	1.0109	1	1
PRSS56	0.758072	1	1
PTCH2	0.866361	1	1
PTPRF	1.0109	1	1
PTPRU	1.0109	1	1
PUSL1	0.808606	1	1
PXDN	1.0109	1	1
QARS	0.808606	1	1
RAB3GAP1	1.0109	1	1
RASGRP3	1.0109	1	1
RCSD1	1.0109	1	1
RGPD3	1.01091	1	1
RGPD8	1.0109	1	1
RGS2	1.0109	1	1
RGS7	1.0109	1	1
RHBG	0.866361	1	1
RNPC3	1.0109	1	1
RNPEPL1	1.0109	1	1
RP11-507M3.1	0.758072	1	1
RP4-608O15.3	0.758072	1	1
RPTN	1.01091	1	1
RYR2	0.842296	1	1
SASS6	0.758072	1	1
SCCPDH	1.0109	1	1
SCN10A	1.01092	1	1
SCNM1	0.758072	1	1
SCP2	1.0109	1	1
SEC16B	1.01091	1	1
SEMA6C	1.01091	1	1
SEPT10	0.909692	1	1
SESN2	1.0109	1	1
SFXN5	0.808606	1	1
SGO2	1.01091	1	1
SHISA5	0.758072	1	1
SLAMF8	1.0109	1	1
SLC16A4	1.0109	1	1
SLC26A6	1.0109	1	1
SLC2A5	1.0109	1	1
SLC35D1	1.0109	1	1
SLC3A1	0.866361	1	1
SNRNP40	1.0109	1	1
SPATA17	1.0109	1	1
SPATA21	0.808606	1	1
SPTA1	1.01091	1	1
STAC	1.0109	1	1
STARD7	1.01091	1	1
STK11IP	1.01091	1	1
STK36	1.01091	1	1
STRIP1	0.808606	1	1
SULT6B1	0.808606	1	1
SZT2	1.01091	1	1
TATDN2	1.0109	1	1
TCF7L1	0.808606	1	1
TCHHL1	0.808606	1	1
TEKT4	1.01091	1	1
TEX261	1.0109	1	1
TEX38	1.01091	1	1
TINAGL1	1.0109	1	1
TMEM52	0.758072	1	1
TMEM63A	0.808606	1	1
TMEM79	0.758072	1	1
TNNT2	1.0109	1	1
TNS1	1.0109	1	1
TOE1	0.758072	1	1
TOP2B	0.808606	1	1
TP53BP2	0.808606	1	1
TRIM45	0.842296	1	1
TROVE2	1.0109	1	1
TSEN2	1.01091	1	1
TTC4	1.0109	1	1
UFC1	1.0109	1	1
UNC50	0.758072	1	1
VAV3	0.866361	1	1
VIL1	1.01091	1	1
VIPR1	1.0109	1	1
VWA3B	0.91889	1	1
WBP1	1.0109	1	1
WDCP	0.758072	1	1
WDPCP	1.01091	1	1
WDR33	1.0109	1	1
XPC	1.01091	1	1
YARS	1.01091	1	1
YIPF1	1.0109	1	1
YY1AP1	1.01091	1	1
ZCWPW2	1.0109	1	1
ZFYVE9	0.808606	1	1
ZNF502	0.758072	1	1
ZNF672	1.01091	1	1
ZNF687	1.0109	1	1
ZP4	0.808606	1	1
ZSCAN20	1.01091	1	1

## Sheet: Females
gene	OR	P-val	FDR p-val
FANCD2	0.0879421	0.0029899	0.673724
KIAA2012	0.0879421	0.0029899	0.673724
VIT	0.0879421	0.0029899	0.673724
RGPD4	6.83137	0.00417863	0.706189
ITGA10	0.0967626	0.00564071	0.740548
XIRP1	0.16118	0.00657291	0.740548
GPSM2	0.107554	0.0105753	0.791962
MEGF6	0.107554	0.0105753	0.791962
ANKZF1	9.74511	0.0117154	0.791962
MTR	9.74511	0.0117154	0.791962
ATAD3B	0.276243	0.0175003	0.797107
ANKMY1	0.121052	0.0196824	0.797107
CCDC150	0.121052	0.0196824	0.797107
GALNT15	0.121052	0.0196824	0.797107
CR2	0.19359	0.0205725	0.797107
TTC31	8.76774	0.0214797	0.797107
DUSP27	5.36049	0.0224545	0.797107
MST1R	3.89851	0.035146	0.797107
C1orf194	0.215198	0.0358185	0.797107
SEMA4F	0.215198	0.0358185	0.797107
ELP6	0.138407	0.0363153	0.797107
FBLIM1	0.138407	0.0363153	0.797107
MPZL1	0.138407	0.0363153	0.797107
OXER1	0.138407	0.0363153	0.797107
PPFIA4	0.138407	0.0363153	0.797107
PRAMEF1	0.138407	0.0363153	0.797107
RNF115	0.138407	0.0363153	0.797107
SMPDL3B	0.138407	0.0363153	0.797107
UCN2	0.138407	0.0363153	0.797107
SYTL1	4.87105	0.0385656	0.797107
CAPN14	7.79019	0.0390561	0.797107
LRRC40	7.79019	0.0390561	0.797107
SLC19A3	7.79019	0.0390561	0.797107
TCHH	3.57206	0.0573601	0.797107
ALS2CR11	0.242208	0.0615628	0.797107
LY9	0.242208	0.0615628	0.797107
SEMA3B	0.242208	0.0615628	0.797107
LCT	4.38203	0.0654187	0.797107
VILL	4.38203	0.0654187	0.797107
ACKR1	0.161547	0.0663048	0.797107
CD1D	0.161547	0.0663048	0.797107
CGN	0.161547	0.0663048	0.797107
DDX20	0.161547	0.0663048	0.797107
FIGLA	0.161547	0.0663048	0.797107
LCLAT1	0.161547	0.0663048	0.797107
PRSS42	0.161547	0.0663048	0.797107
PTPN22	0.161547	0.0663048	0.797107
PTPN7	0.161547	0.0663048	0.797107
SUCO	0.161547	0.0663048	0.797107
ZNF672	0.161547	0.0663048	0.797107
CASP10	6.81348	0.0703043	0.797107
CIR1	6.81348	0.0703043	0.797107
CLCA4	6.81348	0.0703043	0.797107
IARS2	6.81348	0.0703043	0.797107
MAP4	6.81348	0.0703043	0.797107
METTL18	6.81348	0.0703043	0.797107
NUP210	6.81348	0.0703043	0.797107
SCN7A	6.81348	0.0703043	0.797107
TMCO4	6.81348	0.0703043	0.797107
XIRP2	0.41473	0.0740053	0.797107
CCDC148	0.276937	0.104217	0.797107
CHD1L	0.276937	0.104217	0.797107
CIB4	0.276937	0.104217	0.797107
CPTP	0.276937	0.104217	0.797107
GBP5	0.276937	0.104217	0.797107
IL18R1	0.276937	0.104217	0.797107
WDR63	0.276937	0.104217	0.797107
AHSA2	3.89343	0.109362	0.797107
ARHGEF19	3.89343	0.109362	0.797107
EML4	3.89343	0.109362	0.797107
ARHGEF16	0.193943	0.119503	0.797107
BCS1L	0.193943	0.119503	0.797107
CCT4	0.193943	0.119503	0.797107
CD46	0.193943	0.119503	0.797107
COG2	0.193943	0.119503	0.797107
DNASE2B	0.193943	0.119503	0.797107
DRC1	0.193943	0.119503	0.797107
EPHB2	0.193943	0.119503	0.797107
FAM136A	0.193943	0.119503	0.797107
FCGR2B	0.193943	0.119503	0.797107
FLVCR1	0.193943	0.119503	0.797107
GBP3	0.193943	0.119503	0.797107
GPA33	0.193943	0.119503	0.797107
IQCC	0.193943	0.119503	0.797107
KIF15	0.193943	0.119503	0.797107
NOP58	0.193943	0.119503	0.797107
PRELP	0.193943	0.119503	0.797107
SLC16A1	0.193943	0.119503	0.797107
SLC4A1AP	0.193943	0.119503	0.797107
SLC9A4	0.193943	0.119503	0.797107
SNX27	0.193943	0.119503	0.797107
TOP2B	0.193943	0.119503	0.797107
TP53I3	0.193943	0.119503	0.797107
TTLL4	0.193943	0.119503	0.797107
TUBA3E	0.193943	0.119503	0.797107
WDR77	0.193943	0.119503	0.797107
ZP4	0.193943	0.119503	0.797107
ABI2	5.83761	0.12499	0.797107
BECN2	5.83761	0.12499	0.797107
C8B	5.83761	0.12499	0.797107
HENMT1	5.83761	0.12499	0.797107
KRTCAP3	5.83761	0.12499	0.797107
NPL	5.83761	0.12499	0.797107
PTGER3	5.83761	0.12499	0.797107
SLC23A3	5.83761	0.12499	0.797107
WLS	5.83761	0.12499	0.797107
COL4A3	0.363409	0.140081	0.86086
CROCC	0.363409	0.140081	0.86086
LRRC42	0.363409	0.140081	0.86086
TARBP1	0.363409	0.140081	0.86086
NEB	0.484296	0.160814	0.916681
IFT172	0.430697	0.173151	0.916681
ABHD1	0.323181	0.173268	0.916681
ASTL	0.323181	0.173268	0.916681
C2orf74	0.323181	0.173268	0.916681
DNPEP	0.323181	0.173268	0.916681
DRAXIN	0.323181	0.173268	0.916681
GBP4	0.323181	0.173268	0.916681
GPATCH4	0.323181	0.173268	0.916681
MSH6	0.323181	0.173268	0.916681
NOC2L	0.323181	0.173268	0.916681
SPAG17	0.323181	0.173268	0.916681
SRBD1	0.323181	0.173268	0.916681
WDR3	0.323181	0.173268	0.916681
ZNF670	0.323181	0.173268	0.916681
HMCN1	2.43385	0.179543	0.916681
GCKR	3.40525	0.179673	0.916681
GPR153	3.40525	0.179673	0.916681
KCNH8	3.40525	0.179673	0.916681
MTMR11	3.40525	0.179673	0.916681
NES	3.40525	0.179673	0.916681
WDPCP	3.40525	0.179673	0.916681
PLB1	1.82606	0.210001	0.916681
ABCG8	4.86258	0.21874	0.916681
ADCY3	4.86258	0.21874	0.916681
CD8B	4.86258	0.21874	0.916681
DYNC2LI1	4.86258	0.21874	0.916681
FMO2	4.86258	0.21874	0.916681
HMGB4	4.86258	0.21874	0.916681
LYST	4.86258	0.21874	0.916681
MPC2	4.86258	0.21874	0.916681
NIT1	4.86258	0.21874	0.916681
PRKAR2A	4.86258	0.21874	0.916681
PRSS38	4.86258	0.21874	0.916681
PSRC1	4.86258	0.21874	0.916681
RABGAP1L	4.86258	0.21874	0.916681
RAPH1	4.86258	0.21874	0.916681
RNPEP	4.86258	0.21874	0.916681
RSG1	4.86258	0.21874	0.916681
RUFY4	4.86258	0.21874	0.916681
SP9	4.86258	0.21874	0.916681
TAF1B	4.86258	0.21874	0.916681
TEKT2	4.86258	0.21874	0.916681
TMCO1	4.86258	0.21874	0.916681
TMED5	4.86258	0.21874	0.916681
TNFRSF18	4.86258	0.21874	0.916681
WDSUB1	4.86258	0.21874	0.916681
DALRD3	0.415498	0.219678	0.916681
LARS2	0.415498	0.219678	0.916681
OTOF	0.415498	0.219678	0.916681
PIGV	0.415498	0.219678	0.916681
SEPT10	0.415498	0.219678	0.916681
FBLN2	2.59497	0.226543	0.930459
GCFC2	2.59497	0.226543	0.930459
DNAH6	0.528553	0.230932	0.930459
ASPM	1.94697	0.237854	0.930459
TTN	1.34181	0.247158	0.930459
USH2A	0.565242	0.256093	0.930459
DOCK10	0.484747	0.259739	0.930459
ZNF697	0.484747	0.259739	0.930459
C1orf167	1.8079	0.263141	0.930459
CPSF3L	2.18926	0.266823	0.930459
PDE11A	2.18926	0.266823	0.930459
TRANK1	2.18926	0.266823	0.930459
AQP10	0.387985	0.28184	0.930459
ATP1A4	0.387985	0.28184	0.930459
CAPN13	0.387985	0.28184	0.930459
CC2D1B	0.387985	0.28184	0.930459
CNGA3	0.387985	0.28184	0.930459
CNKSR1	0.387985	0.28184	0.930459
CNTN6	0.387985	0.28184	0.930459
CYP8B1	0.387985	0.28184	0.930459
ECEL1	0.387985	0.28184	0.930459
EDAR	0.387985	0.28184	0.930459
EDEM1	0.387985	0.28184	0.930459
FAM89A	0.387985	0.28184	0.930459
FCRLB	0.387985	0.28184	0.930459
GLB1L	0.387985	0.28184	0.930459
IDH1	0.387985	0.28184	0.930459
KANK4	0.387985	0.28184	0.930459
KIF9	0.387985	0.28184	0.930459
MROH7	0.387985	0.28184	0.930459
NUAK2	0.387985	0.28184	0.930459
PADI2	0.387985	0.28184	0.930459
VRK2	0.387985	0.28184	0.930459
ZKSCAN7	0.387985	0.28184	0.930459
ATIC	2.91805	0.289048	0.930459
EFHB	2.91805	0.289048	0.930459
FMO5	2.91805	0.289048	0.930459
MST1	2.91805	0.289048	0.930459
POLR1A	2.91805	0.289048	0.930459
PRAMEF12	2.91805	0.289048	0.930459
RANBP2	2.91805	0.289048	0.930459
SEMA6C	2.91805	0.289048	0.930459
SETMAR	2.91805	0.289048	0.930459
SLC9C2	2.91805	0.289048	0.930459
TSEN2	2.91805	0.289048	0.930459
UBXN11	2.91805	0.289048	0.930459
ZRANB3	2.91805	0.289048	0.930459
ZZZ3	2.91805	0.289048	0.930459
IFIH1	1.94613	0.301731	0.962124
IGFN1	1.94613	0.301731	0.962124
LAMB3	0.58166	0.325107	0.978608
ACKR2	0.484973	0.336521	0.978608
CAPN7	0.484973	0.336521	0.978608
CYP20A1	0.484973	0.336521	0.978608
FAP	0.484973	0.336521	0.978608
RGPD2	0.484973	0.336521	0.978608
STK11IP	0.484973	0.336521	0.978608
ANKRD36	0.666117	0.337744	0.978608
ERICH3	2.26934	0.343732	0.978608
FYCO1	2.26934	0.343732	0.978608
PDE4DIP	2.26934	0.343732	0.978608
PLA2R1	2.26934	0.343732	0.978608
VPS13D	2.26934	0.343732	0.978608
ZDBF2	2.26934	0.343732	0.978608
COL24A1	0.616896	0.352125	0.978608
FAM132A	0.554233	0.380589	0.978608
UBE2U	0.554233	0.380589	0.978608
FLG	1.31467	0.381618	0.978608
DISP1	1.9453	0.387674	0.978608
INSRR	1.9453	0.387674	0.978608
LRRC71	1.9453	0.387674	0.978608
DNAH7	0.671097	0.397867	0.978608
HRNR	0.671097	0.397867	0.978608
FSIP2	1.4596	0.424315	0.978608
ALPPL2	0.485198	0.446247	0.978608
AMPD2	0.485198	0.446247	0.978608
AMY2A	0.485198	0.446247	0.978608
ANGPTL3	0.485198	0.446247	0.978608
APITD1	0.485198	0.446247	0.978608
APOB	0.485198	0.446247	0.978608
AVPR1B	0.485198	0.446247	0.978608
BRDT	0.485198	0.446247	0.978608
C3orf62	0.485198	0.446247	0.978608
CD1B	0.485198	0.446247	0.978608
CPT2	0.485198	0.446247	0.978608
CRB1	0.485198	0.446247	0.978608
CRIM1	0.485198	0.446247	0.978608
CRNN	0.485198	0.446247	0.978608
DARS	0.485198	0.446247	0.978608
DNAJC10	0.485198	0.446247	0.978608
EIF5B	0.485198	0.446247	0.978608
FAM167B	0.485198	0.446247	0.978608
FHAD1	0.485198	0.446247	0.978608
GALNT2	0.485198	0.446247	0.978608
GYPC	0.485198	0.446247	0.978608
IAH1	0.485198	0.446247	0.978608
KLHL17	0.485198	0.446247	0.978608
LAX1	0.485198	0.446247	0.978608
MAP3K6	0.485198	0.446247	0.978608
NBEAL2	0.485198	0.446247	0.978608
NBPF10	0.485198	0.446247	0.978608
NEK10	0.485198	0.446247	0.978608
PBXIP1	0.485198	0.446247	0.978608
PMF1	0.485198	0.446247	0.978608
PTPN14	0.485198	0.446247	0.978608
RAD54L	0.485198	0.446247	0.978608
SELP	0.485198	0.446247	0.978608
SFTPB	0.485198	0.446247	0.978608
SLC22A14	0.485198	0.446247	0.978608
SNTG2	0.485198	0.446247	0.978608
SPOCD1	0.485198	0.446247	0.978608
SPTA1	0.485198	0.446247	0.978608
SYDE2	0.485198	0.446247	0.978608
TBCE	0.485198	0.446247	0.978608
TDRD5	0.485198	0.446247	0.978608
THUMPD3	0.485198	0.446247	0.978608
TMIE	0.485198	0.446247	0.978608
TRIM45	0.485198	0.446247	0.978608
TROVE2	0.485198	0.446247	0.978608
TTLL3	0.485198	0.446247	0.978608
WDR33	0.485198	0.446247	0.978608
WDR35	0.485198	0.446247	0.978608
WDR64	0.485198	0.446247	0.978608
ZC3H6	0.485198	0.446247	0.978608
ZNF124	0.485198	0.446247	0.978608
TNN	0.646566	0.447749	0.978608
CA14	2.43071	0.453113	0.978608
CCDC121	2.43071	0.453113	0.978608
CFAP45	2.43071	0.453113	0.978608
CRYBA2	2.43071	0.453113	0.978608
FMN2	2.43071	0.453113	0.978608
GRB14	2.43071	0.453113	0.978608
GTF3C3	2.43071	0.453113	0.978608
H6PD	2.43071	0.453113	0.978608
LHCGR	2.43071	0.453113	0.978608
MED8	2.43071	0.453113	0.978608
MUTYH	2.43071	0.453113	0.978608
NCKAP1	2.43071	0.453113	0.978608
PGAP1	2.43071	0.453113	0.978608
PODN	2.43071	0.453113	0.978608
RRNAD1	2.43071	0.453113	0.978608
SDE2	2.43071	0.453113	0.978608
SERINC2	2.43071	0.453113	0.978608
SLC26A9	2.43071	0.453113	0.978608
SSUH2	2.43071	0.453113	0.978608
TAF1A	2.43071	0.453113	0.978608
TRMT61B	2.43071	0.453113	0.978608
TTC27	2.43071	0.453113	0.978608
ULK4	2.43071	0.453113	0.978608
ZNF852	2.43071	0.453113	0.978608
ZSWIM2	2.43071	0.453113	0.978608
DLEC1	0.678878	0.47412	0.992114
HTR2B	0.678878	0.47412	0.992114
ACOT11	0.582209	0.501387	0.992114
ANKRD35	0.582209	0.501387	0.992114
CDHR4	0.582209	0.501387	0.992114
CLHC1	0.582209	0.501387	0.992114
CR1L	0.582209	0.501387	0.992114
ESPNL	0.582209	0.501387	0.992114
FAM124B	0.582209	0.501387	0.992114
FOXO6	0.582209	0.501387	0.992114
GSTM2	0.582209	0.501387	0.992114
HYI	0.582209	0.501387	0.992114
LAMC2	0.582209	0.501387	0.992114
MPL	0.582209	0.501387	0.992114
PHTF1	0.582209	0.501387	0.992114
PIGF	0.582209	0.501387	0.992114
SEPN1	0.582209	0.501387	0.992114
TDRKH	0.582209	0.501387	0.992114
ZNF142	0.582209	0.501387	0.992114
MYO3B	1.45899	0.503414	0.992114
ATG4C	1.94448	0.507798	0.992114
CACHD1	1.94448	0.507798	0.992114
CAPN8	1.94448	0.507798	0.992114
CDK18	1.94448	0.507798	0.992114
CFAP74	1.94448	0.507798	0.992114
DYSF	1.94448	0.507798	0.992114
FAM129A	1.94448	0.507798	0.992114
JMJD4	1.94448	0.507798	0.992114
LRIG2	1.94448	0.507798	0.992114
MSTO1	1.94448	0.507798	0.992114
OR2T27	1.94448	0.507798	0.992114
PPM1B	1.94448	0.507798	0.992114
ST7L	1.94448	0.507798	0.992114
CCDC74B	0.646876	0.542799	1
FAM131C	0.646876	0.542799	1
MAST2	0.646876	0.542799	1
NBPF1	0.646876	0.542799	1
PCNX2	0.646876	0.542799	1
SCN11A	0.646876	0.542799	1
THADA	0.646876	0.542799	1
ALS2CR12	1.70144	0.548812	1
C2orf16	1.70144	0.548812	1
CFAP65	1.70144	0.548812	1
DPYD	1.70144	0.548812	1
IGSF9	1.70144	0.548812	1
LRRIQ3	1.70144	0.548812	1
NPHP4	1.70144	0.548812	1
PLEKHH2	1.70144	0.548812	1
TMEM206	1.70144	0.548812	1
TTC21B	1.70144	0.548812	1
ARHGEF4	0.693061	0.575365	1
CENPF	0.693061	0.575365	1
HEATR5B	0.693061	0.575365	1
TESK2	1.55561	0.581036	1
HHIPL2	1.45839	0.607219	1
ALMS1	1.38894	0.629038	1
OBSCN	1.14937	0.665417	1
DNMT3A	0.820911	0.685636	1
ADGRF3	1.94365	0.687493	1
ALK	1.94365	0.687493	1
ANKRD65	1.94365	0.687493	1
C3orf20	1.94365	0.687493	1
CACNA1S	1.94365	0.687493	1
CDCP1	1.94365	0.687493	1
COL6A3	1.94365	0.687493	1
CPO	1.94365	0.687493	1
CSF3R	1.94365	0.687493	1
CYB5RL	1.94365	0.687493	1
DBT	1.94365	0.687493	1
EXO1	1.94365	0.687493	1
EXTL2	1.94365	0.687493	1
FAM126B	1.94365	0.687493	1
FAM151A	1.94365	0.687493	1
GPAT2	1.94365	0.687493	1
GPD2	1.94365	0.687493	1
GSTM5	1.94365	0.687493	1
ITGA4	1.94365	0.687493	1
ITSN2	1.94365	0.687493	1
KDM5B	1.94365	0.687493	1
LDLRAD2	1.94365	0.687493	1
LGR6	1.94365	0.687493	1
LIMS2	1.94365	0.687493	1
MAP3K19	1.94365	0.687493	1
MBOAT2	1.94365	0.687493	1
MON1A	1.94365	0.687493	1
NBPF9	1.94365	0.687493	1
NMS	1.94365	0.687493	1
NUDT17	1.94365	0.687493	1
OR6K2	1.94365	0.687493	1
OSBPL10	1.94365	0.687493	1
OSCP1	1.94365	0.687493	1
PADI4	1.94365	0.687493	1
PEAR1	1.94365	0.687493	1
PMS1	1.94365	0.687493	1
PNPT1	1.94365	0.687493	1
RAVER2	1.94365	0.687493	1
RP5-862P8.2	1.94365	0.687493	1
SEP15	1.94365	0.687493	1
SLC30A7	1.94365	0.687493	1
SP140	1.94365	0.687493	1
SPHKAP	1.94365	0.687493	1
SSFA2	1.94365	0.687493	1
TADA3	1.94365	0.687493	1
THEM5	1.94365	0.687493	1
THSD7B	1.94365	0.687493	1
TIGD1	1.94365	0.687493	1
TRAF5	1.94365	0.687493	1
TTC7A	1.94365	0.687493	1
ZNF669	1.94365	0.687493	1
ABL2	0.728053	0.722548	1
ALS2CL	0.728053	0.722548	1
ANKRD53	0.728053	0.722548	1
BNIPL	0.728053	0.722548	1
C2orf70	0.728053	0.722548	1
C2orf81	0.728053	0.722548	1
CDK11A	0.728053	0.722548	1
CLEC4F	0.728053	0.722548	1
DNALI1	0.728053	0.722548	1
EXOG	0.728053	0.722548	1
F5	0.728053	0.722548	1
FAM71A	0.728053	0.722548	1
FN1	0.728053	0.722548	1
GDF7	0.728053	0.722548	1
HCRTR1	0.728053	0.722548	1
KANSL1L	0.728053	0.722548	1
KIAA1614	0.728053	0.722548	1
LAMB2	0.728053	0.722548	1
LYPLAL1	0.728053	0.722548	1
METTL8	0.728053	0.722548	1
MRPS9	0.728053	0.722548	1
MYO7B	0.728053	0.722548	1
ORC4	0.728053	0.722548	1
PLEKHN1	0.728053	0.722548	1
PRKAA2	0.728053	0.722548	1
PRKAG3	0.728053	0.722548	1
PROM2	0.728053	0.722548	1
PRRC2C	0.728053	0.722548	1
RBM34	0.728053	0.722548	1
RHBG	0.728053	0.722548	1
SHISA5	0.728053	0.722548	1
SLC3A1	0.728053	0.722548	1
SP110	0.728053	0.722548	1
TMEM52	0.728053	0.722548	1
TOR1AIP1	0.728053	0.722548	1
TOR3A	0.728053	0.722548	1
TTF2	0.728053	0.722548	1
UNC80	0.728053	0.722548	1
XPC	0.728053	0.722548	1
YY1AP1	0.728053	0.722548	1
ZMYM6	0.728053	0.722548	1
ZNF502	0.728053	0.722548	1
ZNF638	0.728053	0.722548	1
ABCA12	1.61975	0.726554	1
ADAM15	1.61975	0.726554	1
C1orf101	1.61975	0.726554	1
C2orf73	1.61975	0.726554	1
CAPN10	1.61975	0.726554	1
CCDC17	1.61975	0.726554	1
CCDC181	1.61975	0.726554	1
CDC14A	1.61975	0.726554	1
CROCC2	1.61975	0.726554	1
HAAO	1.61975	0.726554	1
NADK	1.61975	0.726554	1
NVL	1.61975	0.726554	1
POLR3C	1.61975	0.726554	1
RERE	1.61975	0.726554	1
RMDN2	1.61975	0.726554	1
RPF1	1.61975	0.726554	1
ABCG5	0.776568	0.75029	1
ANKAR	0.776568	0.75029	1
CCDC18	0.776568	0.75029	1
DPP4	0.776568	0.75029	1
ERCC3	0.776568	0.75029	1
FER1L5	0.776568	0.75029	1
LPIN1	0.776568	0.75029	1
RGPD3	0.776568	0.75029	1
SLC1A7	0.776568	0.75029	1
TBC1D8	0.776568	0.75029	1
TRPM8	0.776568	0.75029	1
TTC21A	0.776568	0.75029	1
ZNF620	0.776568	0.75029	1
ATRIP	1.45779	0.753897	1
C2orf71	1.45779	0.753897	1
ELMOD3	1.45779	0.753897	1
FAM198A	1.45779	0.753897	1
KIAA1522	1.45779	0.753897	1
LRP2	1.45779	0.753897	1
MYOC	1.45779	0.753897	1
OR2T34	1.45779	0.753897	1
SCN10A	1.45779	0.753897	1
SEC16B	1.45779	0.753897	1
SH3D21	1.45779	0.753897	1
SMPD4	1.45779	0.753897	1
TNNI3K	1.45779	0.753897	1
UBA7	1.45779	0.753897	1
AIM1L	0.808906	0.771096	1
IQGAP3	0.808906	0.771096	1
LY75	0.808906	0.771096	1
COL7A1	1.36061	0.774404	1
L1TD1	1.36061	0.774404	1
NID1	1.36061	0.774404	1
PPP2R5A	1.36061	0.774404	1
HACL1	0.832001	0.787443	1
MAP10	0.832001	0.787443	1
RFX8	0.832001	0.787443	1
PRG4	1.29581	0.790517	1
RESP18	1.29581	0.790517	1
CLCNKB	0.849319	0.800725	1
XDH	0.849319	0.800725	1
AXDND1	1.24953	0.803608	1
COL16A1	1.24953	0.803608	1
FLG2	0.862786	0.811794	1
SLC6A20	0.862786	0.811794	1
NBEAL1	1.21481	0.814518	1
HFM1	0.873556	0.821202	1
DNAH14	1.06429	0.880379	1
ACADL	1.16576	1	1
C1orf168	1.16576	1	1
PATJ	1.16576	1	1
SAMD11	1.16576	1	1
SCN9A	1.16576	1	1
TAS1R1	1.16576	1	1
ABCA4	1.21434	1	1
ABCB6	1.13337	1	1
ADAMTSL4	1.29529	1	1
ADCY10	1.21434	1	1
AGAP1	0.971103	1	1
AGL	1.13337	1	1
AGXT	0.971103	1	1
ANO7	0.971052	1	1
AOX1	0.97104	1	1
APLF	0.971103	1	1
ARMC9	0.97109	1	1
ASB17	0.97109	1	1
ASB18	1.29529	1	1
ASNSD1	1.29529	1	1
B3GALNT2	1.29529	1	1
BTBD19	1.29529	1	1
C1orf112	0.97109	1	1
C1orf127	0.971078	1	1
C8A	0.97109	1	1
CACYBP	0.971103	1	1
CCDC138	1.29529	1	1
CCDC173	0.971103	1	1
CCDC27	1.29529	1	1
CD48	0.971103	1	1
CDK15	1.21434	1	1
CEBPZ	0.971078	1	1
CEP85	0.97109	1	1
CFAP221	0.97109	1	1
CFAP57	0.971103	1	1
CHRNG	1.21434	1	1
CR1	0.971065	1	1
CYP4B1	0.97109	1	1
DARS2	0.971103	1	1
DCLRE1B	1.29529	1	1
DCST1	0.971103	1	1
DENND2C	1.29529	1	1
DHX57	0.971103	1	1
DIS3L2	0.971103	1	1
DISC1	1.29529	1	1
DOCK7	0.971103	1	1
ECM1	0.971065	1	1
EFCAB7	1.29529	1	1
EML6	1.21434	1	1
EPS8L3	1.21434	1	1
ERO1B	1.29529	1	1
F13B	0.971103	1	1
FAM161A	0.971103	1	1
FARP2	0.971052	1	1
FASTKD1	1.29529	1	1
FCRL3	0.971103	1	1
FEZ2	0.971103	1	1
FMO4	0.971078	1	1
GALNT3	1.29529	1	1
GBP6	1.29529	1	1
GDAP2	0.971103	1	1
GEN1	0.971103	1	1
GGCX	1.29529	1	1
GJC2	1.21434	1	1
GOLGA4	1.21434	1	1
GPR161	0.971103	1	1
GRIP2	1.29529	1	1
HIST2H3D	1.21434	1	1
HSPG2	0.971078	1	1
IFI16	0.97109	1	1
IL36G	0.97109	1	1
IVL	1.29529	1	1
KLHDC7A	0.971103	1	1
KLHL12	0.971103	1	1
LRRFIP2	1.29529	1	1
LTF	0.971103	1	1
MACF1	0.97109	1	1
MASP2	1.29529	1	1
MKRN2	0.971103	1	1
MLH1	0.971103	1	1
MOGAT1	0.971103	1	1
MTIF2	0.971065	1	1
MYOM3	1.21434	1	1
NBAS	0.971052	1	1
NBPF3	0.971103	1	1
NDUFA10	1.29529	1	1
NEUROD1	0.971103	1	1
NLRC4	0.971103	1	1
OLFML2B	0.971103	1	1
OLFML3	0.97109	1	1
OTUD3	0.971103	1	1
OXNAD1	0.971103	1	1
PASK	0.97109	1	1
PDCL3	1.21434	1	1
PER3	0.97109	1	1
PIGC	0.971103	1	1
PLCD4	0.971103	1	1
PLXNA2	0.971103	1	1
PTH2R	0.971103	1	1
PXDN	0.971103	1	1
RAD51AP2	0.971078	1	1
RASGRP3	0.971103	1	1
RCSD1	1.29529	1	1
RGPD1	0.971103	1	1
RGS2	0.971103	1	1
RNF207	0.971103	1	1
RPAP2	0.97109	1	1
RPTN	1.29529	1	1
RYR2	0.971103	1	1
SCCPDH	0.971103	1	1
SCNN1D	0.97104	1	1
SEMA4A	0.971103	1	1
SFXN5	0.97109	1	1
SLAMF7	1.29529	1	1
SLC16A4	0.971103	1	1
SLC25A34	0.971078	1	1
SLC35F5	1.21434	1	1
SMARCAL1	0.971103	1	1
SP100	1.29529	1	1
SSX2IP	1.29529	1	1
STK36	1.29529	1	1
STRIP1	1.29529	1	1
TEKT4	0.971103	1	1
TIE1	1.21434	1	1
TMEM63A	1.29529	1	1
TP53BP2	0.971103	1	1
TTC24	0.971103	1	1
TUFT1	1.29529	1	1
UBR4	0.971103	1	1
UBXN2A	0.971103	1	1
URB2	1.13337	1	1
USP4	0.971103	1	1
USP40	0.97104	1	1
UTP11	1.21434	1	1
VAV3	1.29529	1	1
VIL1	0.971078	1	1
VWA3B	0.971078	1	1
VWA5B1	0.971103	1	1
WDCP	0.971103	1	1
WDR43	1.11023	1	1
WNT10A	0.971103	1	1
XRCC5	1.29529	1	1
YARS	1.21434	1	1
ZFAND2B	1.29529	1	1
ZNF678	1.21434	1	1
ZNF692	0.97109	1	1
ZSWIM5	0.971103	1	1

## Sheet: Males
gene	OR	P-val	FDR p-val
FSIP2	0.24609	0.000809399	0.413995
TRANK1	7.97437	0.00128974	0.413995
AGAP1	0.0822446	0.00173704	0.413995
DPT	0.098817	0.00609554	0.731147
TEKT4	10.9438	0.00629368	0.731147
COL7A1	0.164608	0.00708033	0.731147
MEGF6	6.47126	0.00730776	0.731147
NBEAL1	0.227918	0.0122406	0.731147
TTC21A	0.123611	0.0208641	0.731147
RGPD2	8.94907	0.0213697	0.731147
CFAP57	0.219749	0.037591	0.731147
DCST1	0.219749	0.037591	0.731147
HSD3B2	0.219749	0.037591	0.731147
SLC44A3	0.219749	0.037591	0.731147
CIR1	0.141327	0.0381339	0.731147
DNAJC16	0.141327	0.0381339	0.731147
ECM1	0.141327	0.0381339	0.731147
PHTF1	0.141327	0.0381339	0.731147
RGPD1	0.141327	0.0381339	0.731147
SLC25A24	0.141327	0.0381339	0.731147
TRAF3IP1	0.141327	0.0381339	0.731147
UTP11	0.141327	0.0381339	0.731147
EML6	4.9718	0.038364	0.731147
SHCBP1L	4.9718	0.038364	0.731147
CD101	7.95152	0.0389052	0.731147
DDX20	7.95152	0.0389052	0.731147
HOXD12	7.95152	0.0389052	0.731147
OR10J1	7.95152	0.0389052	0.731147
TMEM59	7.95152	0.0389052	0.731147
CFAP221	0.329431	0.0477762	0.731147
PLB1	0.296604	0.0560486	0.731147
PSD4	0.296604	0.0560486	0.731147
ALS2CR11	3.64595	0.0570541	0.731147
PTCD3	3.64595	0.0570541	0.731147
DNAH6	0.380105	0.0620292	0.731147
ITSN2	0.432174	0.0622443	0.731147
CNKSR1	0.247321	0.064074	0.731147
ERFE	0.247321	0.064074	0.731147
GLMN	0.247321	0.064074	0.731147
MAP3K6	0.247321	0.064074	0.731147
UBE2U	0.247321	0.064074	0.731147
ANXA4	0.164949	0.0689828	0.731147
CFHR4	0.164949	0.0689828	0.731147
FAM129A	0.164949	0.0689828	0.731147
FBXO48	0.164949	0.0689828	0.731147
KLHL40	0.164949	0.0689828	0.731147
NBPF10	0.164949	0.0689828	0.731147
ORC4	0.164949	0.0689828	0.731147
RAVER2	0.164949	0.0689828	0.731147
RESP18	0.164949	0.0689828	0.731147
SNX7	0.164949	0.0689828	0.731147
ABCA4	6.95478	0.0701085	0.731147
BOK	6.95478	0.0701085	0.731147
CCR2	6.95478	0.0701085	0.731147
EFCAB7	6.95478	0.0701085	0.731147
GTF3C3	6.95478	0.0701085	0.731147
NCKIPSD	6.95478	0.0701085	0.731147
PPFIA4	6.95478	0.0701085	0.731147
PASK	0.359526	0.0751772	0.731147
GCC2	0.329705	0.0905672	0.731147
PLA2R1	0.329705	0.0905672	0.731147
OMA1	3.3138	0.0918944	0.731147
SPAG17	3.3138	0.0918944	0.731147
DOCK10	0.282772	0.107599	0.731147
DUSP12	0.282772	0.107599	0.731147
MTMR14	0.282772	0.107599	0.731147
WDPCP	0.282772	0.107599	0.731147
C1orf168	3.97417	0.109047	0.731147
DNAJC10	3.97417	0.109047	0.731147
MST1R	3.97417	0.109047	0.731147
NUP210L	3.97417	0.109047	0.731147
PLCD4	3.97417	0.109047	0.731147
PTPN22	3.97417	0.109047	0.731147
OTOF	0.395635	0.116446	0.731147
XIRP1	2.73385	0.117956	0.731147
ASPM	0.52319	0.119603	0.731147
DNMT3A	0.52319	0.119603	0.731147
AQP12B	0.19802	0.12321	0.731147
ARHGAP29	0.19802	0.12321	0.731147
CAPN14	0.19802	0.12321	0.731147
CASQ1	0.19802	0.12321	0.731147
CELSR3	0.19802	0.12321	0.731147
CYP1B1	0.19802	0.12321	0.731147
DRAM2	0.19802	0.12321	0.731147
EIF2AK3	0.19802	0.12321	0.731147
FAM229A	0.19802	0.12321	0.731147
FAM89A	0.19802	0.12321	0.731147
IFT172	0.19802	0.12321	0.731147
IL36G	0.19802	0.12321	0.731147
INPP5B	0.19802	0.12321	0.731147
ITGB6	0.19802	0.12321	0.731147
LDAH	0.19802	0.12321	0.731147
LNPK	0.19802	0.12321	0.731147
MSH4	0.19802	0.12321	0.731147
OR2L8	0.19802	0.12321	0.731147
PADI6	0.19802	0.12321	0.731147
PGBD2	0.19802	0.12321	0.731147
PGD	0.19802	0.12321	0.731147
PPP1R1C	0.19802	0.12321	0.731147
PREB	0.19802	0.12321	0.731147
QARS	0.19802	0.12321	0.731147
SLC35F5	0.19802	0.12321	0.731147
STK25	0.19802	0.12321	0.731147
TGOLN2	0.19802	0.12321	0.731147
TRMT61B	0.19802	0.12321	0.731147
WDR64	0.19802	0.12321	0.731147
ZNF501	0.19802	0.12321	0.731147
ACADL	5.95884	0.124755	0.731147
ACOXL	5.95884	0.124755	0.731147
ADRA2B	5.95884	0.124755	0.731147
AIM1L	5.95884	0.124755	0.731147
BRDT	5.95884	0.124755	0.731147
C2orf81	5.95884	0.124755	0.731147
FASTKD2	5.95884	0.124755	0.731147
FBXW12	5.95884	0.124755	0.731147
MR1	5.95884	0.124755	0.731147
MRPL37	5.95884	0.124755	0.731147
NDUFAF7	5.95884	0.124755	0.731147
NEXN	5.95884	0.124755	0.731147
NPPA	5.95884	0.124755	0.731147
STON1-GTF2A1L	5.95884	0.124755	0.731147
TACSTD2	5.95884	0.124755	0.731147
ALMS1	2.38595	0.142829	0.803731
AXDND1	0.371067	0.143885	0.803731
C1orf127	0.371067	0.143885	0.803731
CNGA3	0.371067	0.143885	0.803731
FYCO1	0.371067	0.143885	0.803731
PER3	0.371067	0.143885	0.803731
ANO7	2.98114	0.145545	0.806703
CENPF	0.556114	0.165843	0.820549
FLG	0.678776	0.172977	0.820549
C1orf194	0.439787	0.177195	0.820549
ODF2L	0.439787	0.177195	0.820549
RAD54L	0.439787	0.177195	0.820549
ALDH4A1	0.329978	0.177517	0.820549
ARHGEF10L	0.329978	0.177517	0.820549
CACNA1S	0.329978	0.177517	0.820549
CAPN13	0.329978	0.177517	0.820549
CCDC140	0.329978	0.177517	0.820549
CYP4Z1	0.329978	0.177517	0.820549
DPP4	0.329978	0.177517	0.820549
EIF5B	0.329978	0.177517	0.820549
EMILIN1	0.329978	0.177517	0.820549
FAHD2B	0.329978	0.177517	0.820549
MARCO	0.329978	0.177517	0.820549
PAPOLG	0.329978	0.177517	0.820549
PIK3R3	0.329978	0.177517	0.820549
WDR78	0.329978	0.177517	0.820549
ZNF142	0.329978	0.177517	0.820549
CHD1L	2.48434	0.178995	0.820549
MROH7	2.48434	0.178995	0.820549
CHRND	3.47596	0.17932	0.820549
TCF7L1	3.47596	0.17932	0.820549
VWA5B1	3.47596	0.17932	0.820549
PARD3B	2.18612	0.209429	0.820549
ASNSD1	4.96368	0.218488	0.820549
ATP6V1C2	4.96368	0.218488	0.820549
C1GALT1C1L	4.96368	0.218488	0.820549
CAPZA1	4.96368	0.218488	0.820549
CHI3L1	4.96368	0.218488	0.820549
CPNE9	4.96368	0.218488	0.820549
EHBP1	4.96368	0.218488	0.820549
EML4	4.96368	0.218488	0.820549
EXOSC7	4.96368	0.218488	0.820549
FCRL1	4.96368	0.218488	0.820549
GPN1	4.96368	0.218488	0.820549
GPR75	4.96368	0.218488	0.820549
KIAA1324	4.96368	0.218488	0.820549
LEPR	4.96368	0.218488	0.820549
LPIN1	4.96368	0.218488	0.820549
LRPPRC	4.96368	0.218488	0.820549
LRRC52	4.96368	0.218488	0.820549
MATN3	4.96368	0.218488	0.820549
NMI	4.96368	0.218488	0.820549
OR2AK2	4.96368	0.218488	0.820549
PCSK9	4.96368	0.218488	0.820549
PRAMEF10	4.96368	0.218488	0.820549
PRAMEF4	4.96368	0.218488	0.820549
PRSS45	4.96368	0.218488	0.820549
RAB11FIP5	4.96368	0.218488	0.820549
REN	4.96368	0.218488	0.820549
RUFY4	4.96368	0.218488	0.820549
SDC1	4.96368	0.218488	0.820549
SLC22A13	4.96368	0.218488	0.820549
XCL1	4.96368	0.218488	0.820549
KIF17	0.424239	0.224148	0.820549
MIB2	0.424239	0.224148	0.820549
PAFAH2	0.424239	0.224148	0.820549
SEMA6C	0.424239	0.224148	0.820549
TOR1AIP1	0.424239	0.224148	0.820549
TSEN2	0.424239	0.224148	0.820549
C1orf101	2.64885	0.226081	0.820549
DUSP27	2.64885	0.226081	0.820549
MFF	2.64885	0.226081	0.820549
MYOM3	2.64885	0.226081	0.820549
OR2T35	2.64885	0.226081	0.820549
SEPT10	2.64885	0.226081	0.820549
ATAD3B	0.494959	0.264264	0.852963
PCNX2	0.494959	0.264264	0.852963
SEC16B	0.494959	0.264264	0.852963
TNN	0.494959	0.264264	0.852963
TTLL10	0.494959	0.264264	0.852963
WDR43	0.494959	0.264264	0.852963
NPHP4	2.23504	0.266259	0.852963
NUP210	2.23504	0.266259	0.852963
SAMD11	2.23504	0.266259	0.852963
STK11IP	2.23504	0.266259	0.852963
BCL2L15	0.396128	0.286666	0.852963
BTBD8	0.396128	0.286666	0.852963
CARF	0.396128	0.286666	0.852963
CERKL	0.396128	0.286666	0.852963
EMC1	0.396128	0.286666	0.852963
ESPN	0.396128	0.286666	0.852963
FAM212B	0.396128	0.286666	0.852963
GALNT3	0.396128	0.286666	0.852963
GLRX2	0.396128	0.286666	0.852963
HECTD3	0.396128	0.286666	0.852963
IDH1	0.396128	0.286666	0.852963
KANSL1L	0.396128	0.286666	0.852963
NADK	0.396128	0.286666	0.852963
NEK10	0.396128	0.286666	0.852963
NOC2L	0.396128	0.286666	0.852963
NPHP1	0.396128	0.286666	0.852963
OSBPL6	0.396128	0.286666	0.852963
PDE11A	0.396128	0.286666	0.852963
PECR	0.396128	0.286666	0.852963
POTEI	0.396128	0.286666	0.852963
PREPL	0.396128	0.286666	0.852963
SLC1A7	0.396128	0.286666	0.852963
SPATA21	0.396128	0.286666	0.852963
TRIM45	0.396128	0.286666	0.852963
TRNT1	0.396128	0.286666	0.852963
ZFYVE9	0.396128	0.286666	0.852963
ASAP3	2.97871	0.288695	0.852963
CD302	2.97871	0.288695	0.852963
CYP4A11	2.97871	0.288695	0.852963
KIF14	2.97871	0.288695	0.852963
KLHL41	2.97871	0.288695	0.852963
MYO3B	2.97871	0.288695	0.852963
STARD7	2.97871	0.288695	0.852963
TCTEX1D1	2.97871	0.288695	0.852963
UGT1A8	2.97871	0.288695	0.852963
AGL	0.549942	0.299055	0.876329
SSUH2	0.549942	0.299055	0.876329
MYO7B	1.9866	0.301073	0.878642
APOB	0.495166	0.34126	0.9166
ATP1A4	0.495166	0.34126	0.9166
CLCNKA	0.495166	0.34126	0.9166
CLCNKB	0.495166	0.34126	0.9166
DNTTIP2	0.495166	0.34126	0.9166
FRRS1	0.495166	0.34126	0.9166
GON4L	0.495166	0.34126	0.9166
HMCN1	0.495166	0.34126	0.9166
KIAA2012	0.495166	0.34126	0.9166
NBEAL2	0.495166	0.34126	0.9166
SCNN1D	0.495166	0.34126	0.9166
SNX27	0.495166	0.34126	0.9166
C8A	2.31686	0.343291	0.9166
CA14	2.31686	0.343291	0.9166
CCDC27	2.31686	0.343291	0.9166
DQX1	2.31686	0.343291	0.9166
EXO1	2.31686	0.343291	0.9166
LRRC42	2.31686	0.343291	0.9166
NES	2.31686	0.343291	0.9166
ZYG11A	2.31686	0.343291	0.9166
PDE4DIP	1.49062	0.360238	0.9166
ANKRD53	0.565888	0.385158	0.9166
CR2	0.565888	0.385158	0.9166
EFHB	0.565888	0.385158	0.9166
GCFC2	0.565888	0.385158	0.9166
GPAT2	0.565888	0.385158	0.9166
MACF1	0.565888	0.385158	0.9166
PUS10	0.565888	0.385158	0.9166
ADAM15	1.98579	0.387154	0.9166
IGSF9	1.98579	0.387154	0.9166
RGPD4	1.98579	0.387154	0.9166
HRNR	1.39125	0.403439	0.9166
CFAP65	0.618926	0.421387	0.9166
EPHA10	0.618926	0.421387	0.9166
ERICH3	0.618926	0.421387	0.9166
PLCD1	0.618926	0.421387	0.9166
C1orf167	1.78724	0.423334	0.9166
HFM1	1.78724	0.423334	0.9166
RAD51AP2	1.78724	0.423334	0.9166
OBSCN	0.783237	0.447611	0.9166
AHCTF1	0.495372	0.450886	0.9166
ALLC	0.495372	0.450886	0.9166
BCAN	0.495372	0.450886	0.9166
C1orf43	0.495372	0.450886	0.9166
CAPN2	0.495372	0.450886	0.9166
CCDC13	0.495372	0.450886	0.9166
CCDC142	0.495372	0.450886	0.9166
COG2	0.495372	0.450886	0.9166
CR1L	0.495372	0.450886	0.9166
CREG1	0.495372	0.450886	0.9166
DENND1B	0.495372	0.450886	0.9166
DLEC1	0.495372	0.450886	0.9166
DPH2	0.495372	0.450886	0.9166
EXTL1	0.495372	0.450886	0.9166
FCGR2C	0.495372	0.450886	0.9166
FMO4	0.495372	0.450886	0.9166
GLB1	0.495372	0.450886	0.9166
GLMP	0.495372	0.450886	0.9166
GPATCH11	0.495372	0.450886	0.9166
GPR157	0.495372	0.450886	0.9166
GPR35	0.495372	0.450886	0.9166
GPR89B	0.495372	0.450886	0.9166
HHIPL2	0.495372	0.450886	0.9166
IBA57	0.495372	0.450886	0.9166
IFI16	0.495372	0.450886	0.9166
KLHL21	0.495372	0.450886	0.9166
KLHL30	0.495372	0.450886	0.9166
KMO	0.495372	0.450886	0.9166
MDH1	0.495372	0.450886	0.9166
NOP58	0.495372	0.450886	0.9166
PGLYRP4	0.495372	0.450886	0.9166
POTEE	0.495372	0.450886	0.9166
PPM1J	0.495372	0.450886	0.9166
PPOX	0.495372	0.450886	0.9166
PPP4R3B	0.495372	0.450886	0.9166
PTGER3	0.495372	0.450886	0.9166
PTH2R	0.495372	0.450886	0.9166
RNPEP	0.495372	0.450886	0.9166
SLAMF9	0.495372	0.450886	0.9166
SLC2A7	0.495372	0.450886	0.9166
SPAG16	0.495372	0.450886	0.9166
SRBD1	0.495372	0.450886	0.9166
TAS1R3	0.495372	0.450886	0.9166
TCHHL1	0.495372	0.450886	0.9166
TRAIP	0.495372	0.450886	0.9166
TTC21B	0.495372	0.450886	0.9166
ZNF620	0.495372	0.450886	0.9166
CROCC2	0.660177	0.451919	0.9166
IFIH1	0.660177	0.451919	0.9166
BSND	2.4813	0.452819	0.9166
C1orf87	2.4813	0.452819	0.9166
C2orf71	2.4813	0.452819	0.9166
CEP350	2.4813	0.452819	0.9166
CHRNG	2.4813	0.452819	0.9166
CRB1	2.4813	0.452819	0.9166
DGKD	2.4813	0.452819	0.9166
EXOSC10	2.4813	0.452819	0.9166
FAM178B	2.4813	0.452819	0.9166
FAM179A	2.4813	0.452819	0.9166
FMN2	2.4813	0.452819	0.9166
GBP2	2.4813	0.452819	0.9166
LOXL3	2.4813	0.452819	0.9166
NBPF4	2.4813	0.452819	0.9166
PIP5K1A	2.4813	0.452819	0.9166
SLC4A1AP	2.4813	0.452819	0.9166
SMARCAL1	2.4813	0.452819	0.9166
TIE1	2.4813	0.452819	0.9166
TNNI3K	2.4813	0.452819	0.9166
TARBP1	1.65487	0.453813	0.9166
USH2A	1.37541	0.471835	0.937527
ABCG5	0.594424	0.505639	0.937527
ALPPL2	0.594424	0.505639	0.937527
CDC20	0.594424	0.505639	0.937527
CMPK1	0.594424	0.505639	0.937527
CROCC	0.594424	0.505639	0.937527
FAM198A	0.594424	0.505639	0.937527
HHATL	0.594424	0.505639	0.937527
IFI44	0.594424	0.505639	0.937527
IGSF8	0.594424	0.505639	0.937527
KLHL17	0.594424	0.505639	0.937527
PAPPA2	0.594424	0.505639	0.937527
POLR3C	0.594424	0.505639	0.937527
SEMA4F	0.594424	0.505639	0.937527
SLC22A14	0.594424	0.505639	0.937527
SLC6A9	0.594424	0.505639	0.937527
SLC9C2	0.594424	0.505639	0.937527
SMPDL3B	0.594424	0.505639	0.937527
SOAT1	0.594424	0.505639	0.937527
SUCLG1	0.594424	0.505639	0.937527
THBS3	0.594424	0.505639	0.937527
VIT	0.594424	0.505639	0.937527
ANO10	1.98498	0.507445	0.937527
ARHGEF16	1.98498	0.507445	0.937527
ARHGEF4	1.98498	0.507445	0.937527
ATPAF1	1.98498	0.507445	0.937527
C1orf123	1.98498	0.507445	0.937527
CAPN10	1.98498	0.507445	0.937527
FGGY	1.98498	0.507445	0.937527
LTBP1	1.98498	0.507445	0.937527
MFSD2B	1.98498	0.507445	0.937527
SH3D21	1.98498	0.507445	0.937527
UBXN11	1.98498	0.507445	0.937527
DNAH14	1.39013	0.540338	0.9754
CDCP2	0.660455	0.546713	0.9754
ITGA10	0.660455	0.546713	0.9754
PLEKHH2	0.660455	0.546713	0.9754
RAD18	0.660455	0.546713	0.9754
SCTR	0.660455	0.546713	0.9754
SLC6A20	0.660455	0.546713	0.9754
C1orf112	1.7369	0.548407	0.9754
GJC2	1.7369	0.548407	0.9754
LRRC71	1.7369	0.548407	0.9754
MOGS	1.7369	0.548407	0.9754
NBPF1	1.7369	0.548407	0.9754
SLC5A9	1.7369	0.548407	0.9754
UGT1A9	1.7369	0.548407	0.9754
ZRANB3	1.7369	0.548407	0.9754
DNAH7	0.778022	0.554576	0.983924
COL24A1	0.707617	0.578987	0.997923
DTNB	0.707617	0.578987	0.997923
OBSL1	0.707617	0.578987	0.997923
SGO1	0.707617	0.578987	0.997923
IGFN1	1.58804	0.580585	0.997923
LY75	1.58804	0.580585	0.997923
TTN	1.19202	0.588123	0.997923
SCN10A	0.742987	0.60521	0.997923
FLG2	1.41792	0.628504	0.997923
ACADM	1.98418	0.687325	0.997923
ADGRL4	1.98418	0.687325	0.997923
AKNAD1	1.98418	0.687325	0.997923
AP4B1	1.98418	0.687325	0.997923
ARHGEF19	1.98418	0.687325	0.997923
ATP2B2	1.98418	0.687325	0.997923
AUNIP	1.98418	0.687325	0.997923
BEST4	1.98418	0.687325	0.997923
BLZF1	1.98418	0.687325	0.997923
BTBD19	1.98418	0.687325	0.997923
C2orf61	1.98418	0.687325	0.997923
C2orf68	1.98418	0.687325	0.997923
C8B	1.98418	0.687325	0.997923
CASP9	1.98418	0.687325	0.997923
CCDC17	1.98418	0.687325	0.997923
CD1E	1.98418	0.687325	0.997923
CDC14A	1.98418	0.687325	0.997923
COBLL1	1.98418	0.687325	0.997923
COL9A2	1.98418	0.687325	0.997923
CPT2	1.98418	0.687325	0.997923
DNPEP	1.98418	0.687325	0.997923
EPHA8	1.98418	0.687325	0.997923
ERO1B	1.98418	0.687325	0.997923
ETAA1	1.98418	0.687325	0.997923
FCRL2	1.98418	0.687325	0.997923
FHAD1	1.98418	0.687325	0.997923
GORASP1	1.98418	0.687325	0.997923
HMGCS2	1.98418	0.687325	0.997923
HTR2B	1.98418	0.687325	0.997923
ICA1L	1.98418	0.687325	0.997923
INSRR	1.98418	0.687325	0.997923
KIAA1522	1.98418	0.687325	0.997923
KIF2C	1.98418	0.687325	0.997923
KIF9	1.98418	0.687325	0.997923
KIFAP3	1.98418	0.687325	0.997923
KLHDC8A	1.98418	0.687325	0.997923
KYNU	1.98418	0.687325	0.997923
LAMB3	1.98418	0.687325	0.997923
MAB21L3	1.98418	0.687325	0.997923
MAEL	1.98418	0.687325	0.997923
MST1	1.98418	0.687325	0.997923
MTOR	1.98418	0.687325	0.997923
NPPB	1.98418	0.687325	0.997923
NUDT17	1.98418	0.687325	0.997923
OR2T8	1.98418	0.687325	0.997923
OR6F1	1.98418	0.687325	0.997923
PAQR6	1.98418	0.687325	0.997923
PDK1	1.98418	0.687325	0.997923
PLEKHG5	1.98418	0.687325	0.997923
PMS1	1.98418	0.687325	0.997923
PPP1R21	1.98418	0.687325	0.997923
RNF19B	1.98418	0.687325	0.997923
RNF223	1.98418	0.687325	0.997923
RP11-507M3.1	1.98418	0.687325	0.997923
SFT2D3	1.98418	0.687325	0.997923
SLC26A9	1.98418	0.687325	0.997923
TMEM237	1.98418	0.687325	0.997923
VIL1	1.98418	0.687325	0.997923
WDR6	1.98418	0.687325	0.997923
ZDBF2	1.98418	0.687325	0.997923
XIRP2	1.22161	0.710314	0.997923
ALS2CL	0.743302	0.72523	0.997923
BCS1L	0.743302	0.72523	0.997923
C1orf106	0.743302	0.72523	0.997923
CCDC173	0.743302	0.72523	0.997923
CDK15	0.743302	0.72523	0.997923
CFAP74	0.743302	0.72523	0.997923
CLHC1	0.743302	0.72523	0.997923
DCDC2B	0.743302	0.72523	0.997923
DENND4B	0.743302	0.72523	0.997923
GLB1L	0.743302	0.72523	0.997923
HADHA	0.743302	0.72523	0.997923
MROH2A	0.743302	0.72523	0.997923
NBPF3	0.743302	0.72523	0.997923
NFYC	0.743302	0.72523	0.997923
PEAR1	0.743302	0.72523	0.997923
PPP2R5A	0.743302	0.72523	0.997923
RABIF	0.743302	0.72523	0.997923
RETSAT	0.743302	0.72523	0.997923
RP4-608O15.3	0.743302	0.72523	0.997923
RYR2	0.743302	0.72523	0.997923
SP140	0.743302	0.72523	0.997923
STK36	0.743302	0.72523	0.997923
TFAP2E	0.743302	0.72523	0.997923
WDR75	0.743302	0.72523	0.997923
ABCB10	1.65353	0.726358	0.997923
AMY2B	1.65353	0.726358	0.997923
CDCA8	1.65353	0.726358	0.997923
CDK11A	1.65353	0.726358	0.997923
CKAP2L	1.65353	0.726358	0.997923
CLCN6	1.65353	0.726358	0.997923
DAP3	1.65353	0.726358	0.997923
DISC1	1.65353	0.726358	0.997923
GBP5	1.65353	0.726358	0.997923
HSPG2	1.65353	0.726358	0.997923
LRRIQ3	1.65353	0.726358	0.997923
MCOLN3	1.65353	0.726358	0.997923
POMGNT1	1.65353	0.726358	0.997923
RAPH1	1.65353	0.726358	0.997923
RIT1	1.65353	0.726358	0.997923
SEMA4A	1.65353	0.726358	0.997923
TGM4	1.65353	0.726358	0.997923
VAV3	1.65353	0.726358	0.997923
ZNF678	1.65353	0.726358	0.997923
ASB18	0.792841	0.75266	0.997923
CNTN6	0.792841	0.75266	0.997923
COL11A1	0.792841	0.75266	0.997923
DYSF	0.792841	0.75266	0.997923
HEATR5B	0.792841	0.75266	0.997923
IL17RE	0.792841	0.75266	0.997923
MERTK	0.792841	0.75266	0.997923
MPP4	0.792841	0.75266	0.997923
RNASEL	0.792841	0.75266	0.997923
SETMAR	0.792841	0.75266	0.997923
TLR5	0.792841	0.75266	0.997923
UNC80	0.792841	0.75266	0.997923
ZKSCAN7	0.792841	0.75266	0.997923
ZNF672	0.792841	0.75266	0.997923
ABCB6	1.48821	0.753676	0.997923
APLF	1.48821	0.753676	0.997923
COL16A1	1.48821	0.753676	0.997923
GCKR	1.48821	0.753676	0.997923
GNAT1	1.48821	0.753676	0.997923
NIF3L1	1.48821	0.753676	0.997923
PATJ	1.48821	0.753676	0.997923
PTPN18	1.48821	0.753676	0.997923
SP100	1.48821	0.753676	0.997923
TEX38	1.48821	0.753676	0.997923
CC2D1B	0.825866	0.773229	1
CEP104	0.825866	0.773229	1
MAP3K19	0.825866	0.773229	1
OLFML2B	0.825866	0.773229	1
SCN11A	0.825866	0.773229	1
SZT2	0.825866	0.773229	1
WDR3	0.825866	0.773229	1
ZMYM6	0.825866	0.773229	1
ADAMTSL4	1.38901	0.774161	1
ANKAR	1.38901	0.774161	1
OR2T27	1.38901	0.774161	1
TBC1D5	1.38901	0.774161	1
FANCD2	0.849453	0.789387	1
VWA3B	0.849453	0.789387	1
RNF207	1.32288	0.790253	1
SCN7A	1.32288	0.790253	1
TCHH	1.32288	0.790253	1
WDR35	0.867143	0.802513	1
CGN	1.27564	0.803326	1
NBAS	1.27564	0.803326	1
XDH	1.27564	0.803326	1
ANKRD36	0.914775	0.843999	1
CR1	1.15708	1	1
L1TD1	0.991402	1	1
PLEKHN1	1.15708	1	1
POTEF	0.991402	1	1
RGPD3	1.15708	1	1
TTLL3	0.991402	1	1
AADACL3	0.991416	1	1
ADCY10	1.19013	1	1
ADGRF3	1.32235	1	1
ALPP	0.991416	1	1
ALS2	0.991405	1	1
AMER3	1.23971	1	1
AMPD1	0.991412	1	1
ANKMY1	1.23971	1	1
ANKRD65	0.991416	1	1
ANKZF1	1.32235	1	1
ANXA9	1.32235	1	1
AOX1	1.32235	1	1
ARMC9	0.991416	1	1
ATAD3C	1.23971	1	1
ATIC	1.32235	1	1
ATP6V1B1	1.32235	1	1
ATP8B2	1.32235	1	1
AVPR1B	0.991409	1	1
BAZ2B	0.991416	1	1
BROX	0.991409	1	1
C1D	0.991416	1	1
C1orf56	0.991416	1	1
C2orf16	1.32235	1	1
C3orf20	0.991416	1	1
CACHD1	0.991416	1	1
CAND2	0.991416	1	1
CAPN9	0.991416	1	1
CCDC138	0.991412	1	1
CCDC141	1.23971	1	1
CCDC18	0.991409	1	1
CCDC30	0.991416	1	1
CCDC93	0.991416	1	1
CFHR5	0.991416	1	1
CHIA	1.32235	1	1
CLCA1	1.32235	1	1
CLCA4	0.991416	1	1
CNNM4	0.991416	1	1
CNR2	1.32235	1	1
CNST	0.991412	1	1
CNTN4	0.991416	1	1
COL4A3	0.991398	1	1
COL4A4	1.32235	1	1
COL6A3	1.32235	1	1
COLGALT2	0.991412	1	1
COQ8A	0.991416	1	1
CPS1	1.23971	1	1
CYS1	0.991416	1	1
DISP3	0.991412	1	1
DOCK7	1.32235	1	1
DPYD	1.19013	1	1
DUSP11	0.991416	1	1
ESPNL	1.32235	1	1
EXOC6B	0.991416	1	1
FAM124B	1.32235	1	1
FAP	0.991416	1	1
FARP2	0.991409	1	1
FASTKD1	1.32235	1	1
FCGR1A	1.32235	1	1
FCRL4	1.23971	1	1
FER1L5	0.991409	1	1
GABPB2	1.32235	1	1
GADL1	0.991412	1	1
GALM	1.32235	1	1
GALNT14	0.991409	1	1
GBP1	0.991416	1	1
GBP7	0.991416	1	1
GEN1	0.991412	1	1
GPA33	0.991416	1	1
GPR1	0.991416	1	1
GPR89A	0.991416	1	1
HEATR1	0.991416	1	1
HIVEP3	1.32235	1	1
IQGAP3	0.991416	1	1
IRAK2	0.991416	1	1
IRS1	0.991416	1	1
ITGA6	0.991416	1	1
ITPRIPL1	1.32235	1	1
JMJD4	0.991416	1	1
KCNH8	1.23971	1	1
KCTD3	0.991416	1	1
KIAA1614	0.991405	1	1
KIF15	0.991416	1	1
LAD1	1.32235	1	1
LRIG2	0.991416	1	1
LRRFIP2	1.23971	1	1
LTF	1.23971	1	1
LUZP1	0.991416	1	1
MASP2	0.991405	1	1
MORN1	0.991409	1	1
MSH6	0.991412	1	1
MTIF2	0.991405	1	1
MTMR11	0.991416	1	1
NAT8B	1.32235	1	1
NBPF26	0.991416	1	1
NBPF9	0.991412	1	1
NEB	0.991388	1	1
NIFK	0.991416	1	1
NKTR	0.991416	1	1
NR1I3	0.991416	1	1
NVL	0.991412	1	1
OXCT2	0.991416	1	1
PADI4	1.23971	1	1
PIKFYVE	1.19013	1	1
PP2D1	1.23971	1	1
PRELP	1.23971	1	1
PTCH2	0.991409	1	1
PTPN23	0.991412	1	1
PUSL1	0.991412	1	1
RGS7	0.991416	1	1
RHBG	0.991412	1	1
RPTN	1.23971	1	1
SCN9A	0.991412	1	1
SGO2	0.991412	1	1
SH3YL1	1.32235	1	1
SLC30A7	0.991416	1	1
SLC3A1	0.991412	1	1
SLC45A1	0.991405	1	1
SLFNL1	1.32235	1	1
SMG7	0.991416	1	1
SPTA1	0.991409	1	1
SSFA2	0.991416	1	1
STON1	0.991412	1	1
STPG1	0.991412	1	1
SULT6B1	0.991416	1	1
TAF1B	1.32235	1	1
TARS2	1.23971	1	1
TBC1D8	0.991416	1	1
TBCE	0.991416	1	1
TESK2	0.991412	1	1
THADA	0.991412	1	1
TMIE	0.991416	1	1
TRAK2	0.991416	1	1
TTC7A	0.991416	1	1
TUBA3E	1.32235	1	1
UBA7	1.32235	1	1
ULK4	0.991409	1	1
UQCRC1	1.32235	1	1
URB2	0.991416	1	1
VIPR1	0.991416	1	1
VPS13D	1.32235	1	1
VPS45	1.23971	1	1
WDR47	0.991416	1	1
WDR54	0.991416	1	1
WLS	0.991416	1	1
YY1AP1	1.23971	1	1
ZFAND2B	0.991412	1	1
ZSCAN20	0.991412	1	1
