# Supplementary material for: Germline burden of rare damaging variants negatively affects human healthspan and lifespan
Source: eLife. 2020 Apr 7;9:e53449. doi: 10.7554/eLife.53449 (PMC7314550; doi:10.7554/eLife.53449)
Supplement: Supplementary file 3. — Burden of ultra-rare PTVs for each gene and burden of synonymous variants was compared to the global burdens of ultra-rare PTVs and synonymous variants. [file elife-53449-supp3.xls]

## Sheet: fischer_test
gene_ptv – number of ultra-rare PTVs (MAF<0.0001) in corresponding gene within UKB cohort, gene_syn - number of synonymous substitutions in corresponding gene within UKB cohort
non_gene_ptv – total number of ultra-rare PTVs in UKB cohort excluding number of ultra-rare PTVs in the gene, non_gene_syn - total number of synonymous substitutions in UKB cohort excluding number of synonymous substitutions in the gene
gene	gene_ptv	gene_syn	non_gene_ptv	non_gene_syn	p	e	p.adj
UBE2Q1	1	46	109795	815234	0.0389564	0.161414	1
RNF14	6	34	109790	815246	0.467827	1.31038	1
RNF17	0	92	109796	815188	1.44682e-05	0	0.257288
RNF10	4	47	109792	815233	0.51557	0.631937	1
RNF11	1	9	109795	815271	1	0.825068	1
RNF13	5	18	109791	815262	0.183644	2.06268	1
REM1	4	19	109792	815261	0.34297	1.56325	1
REM2	3	18	109793	815262	0.731775	1.23757	1
SYNGR2	8	28	109788	815252	0.067336	2.12163	1
RPEL1	4	17	109792	815263	0.303833	1.74718	1
MVB12B	1	14	109795	815266	1	0.530383	1
DUOXA2	4	20	109792	815260	0.52037	1.48509	1
MZT2A	5	17	109791	815263	0.173285	2.184	1
MZT2B	1	19	109795	815261	0.502135	0.390805	1
PMM2	6	15	109790	815265	0.0312846	2.97028	1
PMM1	6	14	109790	815266	0.0247709	3.18235	1
ASS1	4	29	109792	815251	1	1.0242	1
NCBP1	1	42	109795	815238	0.0562151	0.176788	1
SPX	6	10	109790	815270	0.00775377	4.4557	1
ZNF709	23	33	109773	815247	3.07792e-08	5.17621	0.000547347
ZNF708	7	24	109789	815256	0.0871036	2.16582	1
ZNF879	17	49	109779	815231	0.00170534	2.57644	1
NCBP2	2	8	109794	815272	0.336629	1.85633	1
EN1	0	47	109796	815233	0.00522858	0	1
CAMK1	6	28	109790	815252	0.286317	1.59118	1
SPR	2	24	109794	815256	0.762216	0.618778	1
NCBP3	3	48	109793	815232	0.275205	0.464073	1
CAMK4	2	26	109794	815254	0.767292	0.571178	1
ZNF704	1	42	109795	815238	0.0562151	0.176788	1
ZC3H10	5	42	109791	815238	1	0.883954	1
ZC3H13	10	95	109786	815185	0.547092	0.78161	1
RNF115	9	19	109787	815261	0.003878	3.51777	1
ZC3H15	1	23	109795	815257	0.35187	0.322838	1
ZC3H14	4	52	109792	815228	0.405458	0.57117	1
SPN	4	34	109792	815246	1	0.873551	1
HMGCLL1	4	23	109792	815257	0.554175	1.29138	1
ZC3H18	1	100	109795	815180	7.74889e-05	0.0742457	1
GRIN1	5	80	109791	815200	0.0938569	0.464063	1
PISD	6	43	109790	815237	0.82699	1.03611	1
FOXQ1	9	44	109787	815236	0.283177	1.51887	1
DHX9	2	90	109794	815190	0.00175537	0.164994	1
COQ5	5	19	109791	815261	0.196062	1.95417	1
TCOF1	3	146	109793	815134	1.95409e-05	0.152554	0.347496
NSRP1	5	36	109791	815244	0.812539	1.03131	1
NUP98	1	116	109795	815164	1.05902e-05	0.0640037	0.188326
XPC	13	70	109783	815210	0.305614	1.37904	1
SP1	0	45	109796	815235	0.0050825	0	1
GRINA	2	46	109794	815234	0.117522	0.322832	1
SP3	1	52	109795	815228	0.017923	0.142789	1
SP4	1	55	109795	815225	0.0121807	0.135	1
SP5	3	54	109793	815226	0.151028	0.412507	1
SP6	2	32	109794	815248	0.424966	0.464078	1
CAMKV	0	38	109796	815242	0.0195299	0	1
OR5B3	2	25	109794	815255	0.764243	0.594026	1
GOLIM4	12	61	109784	815219	0.208277	1.46078	1
OPA3	4	10	109792	815270	0.0748608	2.97024	1
OPA1	7	83	109789	815197	0.325451	0.626216	1
C1QTNF9B-AS1	0	0	109796	815280	1	0	1
RAB40C	2	35	109794	815245	0.310813	0.424298	1
RAB40B	7	35	109789	815245	0.336223	1.4851	1
KRTAP10-10	9	41	109787	815239	0.186609	1.63001	1
KRTAP21-2	1	5	109795	815275	0.531429	1.48508	1
CBX1	1	8	109795	815272	1	0.928168	1
RP11-190A12.7	0	4	109796	815276	1	0	1
COL7A1	29	250	109767	815030	0.51666	0.861286	1
MDP1	5	12	109791	815268	0.0427947	3.09404	1
FAM187B	5	25	109791	815255	0.394161	1.4851	1
KLLN	4	19	109792	815261	0.34297	1.56325	1
FAM183A	0	12	109796	815268	0.382354	0	1
OVCH2	7	49	109789	815231	0.836169	1.06079	1
OVCH1	24	70	109772	815210	0.000298183	2.54633	1
SPPL2A	3	35	109793	815245	0.617587	0.636454	1
SPPL2B	2	51	109794	815229	0.0854185	0.29118	1
NSL1	3	14	109793	815266	0.444804	1.59116	1
ITGA9	7	85	109789	815195	0.258448	0.61148	1
UGCG	0	25	109796	815255	0.0654582	0	1
MYO3B	30	86	109766	815194	3.42508e-05	2.59069	0.609082
RP4-559A3.7	1	9	109795	815271	1	0.825068	1
ATP2A1	15	82	109781	815198	0.270848	1.35835	1
ATP2A2	0	80	109796	815200	7.88021e-05	0	1
ATP2A3	12	124	109784	815156	0.351852	0.718557	1
ITGA1	17	71	109779	815209	0.0453417	1.77803	1
ITGA2	17	79	109779	815201	0.0822239	1.59795	1
NOP2	6	60	109790	815220	0.701816	0.742527	1
ITGA4	12	78	109784	815202	0.625264	1.14237	1
ITGA5	4	82	109792	815198	0.0430517	0.362192	1
RIT1	3	8	109793	815272	0.133301	2.78457	1
RARRES3	5	11	109791	815269	0.0333832	3.37505	1
TRHR	6	35	109790	815245	0.625718	1.27294	1
DENND4A	9	88	109787	815192	0.530311	0.759397	1
DENND4B	12	102	109784	815178	0.772459	0.873542	1
DENND4C	8	129	109788	815151	0.0245982	0.460451	1
SWAP70	2	26	109794	815254	0.767292	0.571178	1
RARRES1	5	22	109791	815258	0.243689	1.68762	1
UFSP1	8	16	109788	815264	0.00497676	3.71289	1
HSCB	3	12	109793	815268	0.410177	1.85634	1
PHLDA3	1	19	109795	815261	0.502135	0.390805	1
UFSP2	9	27	109787	815253	0.032682	2.47517	1
TACO1	8	24	109788	815256	0.0476751	2.47516	1
CTD-3148I10.9	0	3	109796	815277	1	0	1
GAP43	4	30	109792	815250	1	0.990054	1
PAMR1	13	58	109783	815222	0.0982238	1.66439	1
SQLE	4	42	109792	815238	0.651116	0.707171	1
FBXL13	14	42	109782	815238	0.00580325	2.47524	1
FBXL12	6	35	109790	815245	0.625718	1.27294	1
TIPRL	3	6	109793	815274	0.0810623	3.71277	1
FBXL14	0	51	109796	815229	0.00354113	0	1
FBXL17	1	80	109795	815200	0.000822178	0.0928094	1
HRH1	4	35	109792	815245	1	0.848583	1
FAM169A	4	32	109792	815248	1	0.928166	1
FBXL18	3	92	109793	815188	0.00609022	0.242112	1
FAM169B	2	19	109794	815261	1	0.781626	1
RALGAPA2	15	148	109781	815132	0.333555	0.752542	1
GHDC	9	60	109787	815220	0.710066	1.11379	1
SDK1	13	339	109783	814941	9.19744e-08	0.284666	0.00163558
SDK2	16	253	109780	815027	0.00173522	0.469514	1
GRP	6	14	109790	815266	0.0247709	3.18235	1
TPRN	14	94	109782	815186	0.657154	1.10589	1
THSD4	2	104	109794	815176	0.000404641	0.142781	1
FAM212B	8	13	109788	815267	0.00190809	4.56996	1
CCDC179	3	5	109793	815275	0.0591262	4.45561	1
FAM212A	5	19	109791	815261	0.196062	1.95417	1
CHST9	11	22	109785	815258	0.00103819	3.71296	1
CHST8	6	33	109790	815247	0.457451	1.35009	1
COL4A4	12	133	109784	815147	0.200362	0.669926	1
COL4A3	22	112	109774	815168	0.108421	1.45865	1
COL4A2	21	152	109775	815128	0.906279	1.02589	1
COL4A1	0	163	109796	815117	2.59489e-09	0	4.6145e-05
OR8J3	6	29	109790	815251	0.298848	1.53631	1
CHST1	2	36	109794	815244	0.312795	0.412512	1
CHST3	6	47	109790	815233	1	0.947917	1
CHST2	1	55	109795	815225	0.0121807	0.135	1
CHST5	2	1	109794	815279	0.0389168	14.851	1
CHST4	7	22	109789	815258	0.074709	2.36275	1
CHST6	6	48	109790	815232	1	0.928164	1
ITGAX	10	124	109786	815156	0.140185	0.598787	1
VRTN	4	67	109792	815213	0.138847	0.443287	1
HLX	3	40	109793	815240	0.477203	0.556894	1
HLCS	5	71	109791	815209	0.211432	0.522895	1
NOG	1	16	109795	815264	0.71206	0.464083	1
LIPG	7	52	109789	815228	1	0.999564	1
ITGAV	8	64	109788	815216	1	0.928163	1
COX7C	0	2	109796	815278	1	0	1
ZNF703	1	46	109795	815234	0.0389564	0.161414	1
ITGAL	7	85	109789	815195	0.258448	0.61148	1
ITGAM	8	87	109788	815193	0.344536	0.682773	1
HLF	1	20	109795	815260	0.502998	0.371265	1
NOV	4	25	109792	815255	0.771248	1.18807	1
ITGAD	21	115	109775	815165	0.186376	1.35601	1
FAM134B	5	31	109791	815249	0.610328	1.19765	1
FAM134A	6	47	109790	815233	1	0.947917	1
ZNF700	12	39	109784	815241	0.016159	2.28478	1
SMAD9	6	43	109790	815237	0.82699	1.03611	1
TRERF1	1	123	109795	815157	4.80382e-06	0.0603607	0.0854263
LRPAP1	1	60	109795	815220	0.00852544	0.123749	1
SMAD5	0	27	109796	815253	0.067403	0	1
SMAD6	38	84	109758	815196	1.31557e-08	3.3597	0.000233948
SMAD7	2	51	109794	815229	0.0854185	0.29118	1
GOLPH3L	5	10	109791	815270	0.025374	3.71282	1
SMAD1	1	24	109795	815256	0.353376	0.309386	1
AFTPH	0	33	109796	815247	0.0279962	0	1
ZNF706	0	5	109796	815275	1	0	1
RFK	3	11	109793	815269	0.22648	2.02517	1
AATK-AS1	0	0	109796	815280	1	0	1
AMMECR1L	1	29	109795	815251	0.251562	0.256042	1
TMPRSS11A	8	28	109788	815252	0.067336	2.12163	1
TMPRSS11B	4	31	109792	815249	1	0.958113	1
IGF2R	6	245	109790	815035	7.57911e-08	0.181802	0.00134779
TMPRSS11D	6	27	109790	815253	0.275178	1.65012	1
TMPRSS11E	0	2	109796	815278	1	0	1
TMPRSS11F	9	27	109787	815253	0.032682	2.47517	1
HS3ST2	1	36	109795	815244	0.120983	0.206254	1
CTD-2587H24.4	0	0	109796	815280	1	0	1
PRR14L	11	132	109785	815148	0.153229	0.618746	1
HRH2	2	36	109794	815244	0.312795	0.412512	1
RAD21L1	6	20	109790	815260	0.117171	2.22769	1
PLRG1	0	27	109796	815253	0.067403	0	1
SLC36A3	5	39	109791	815241	1	0.95197	1
CKS1B	3	0	109793	815280	0.00167193	Inf	1
SLC36A1	7	41	109789	815239	0.504845	1.26777	1
HAP1	16	55	109780	815225	0.00949591	2.16029	1
ERICH6	15	30	109781	815250	0.000134849	3.71306	1
ERICH5	6	19	109790	815261	0.110345	2.34481	1
ERICH4	3	10	109793	815270	0.19399	2.22765	1
ERICH3	24	89	109772	815191	0.00500538	2.00262	1
ERICH2	1	7	109795	815273	1	1.06079	1
ERICH1	16	61	109780	815219	0.0214282	1.94787	1
ARTN	2	33	109794	815247	0.428446	0.450015	1
ART1	3	38	109793	815242	0.474761	0.586206	1
HRH3	5	62	109791	815218	0.344791	0.598806	1
ART3	7	17	109789	815263	0.0183811	3.05767	1
ART5	10	23	109786	815257	0.0038464	3.22853	1
ART4	5	9	109791	815271	0.0187096	4.12579	1
DRAP1	3	19	109793	815261	0.739971	1.17243	1
TCEA2	2	27	109794	815253	0.571004	0.550023	1
TCEA3	4	19	109792	815261	0.34297	1.56325	1
TCEA1	4	20	109792	815260	0.52037	1.48509	1
COX4I2	3	22	109793	815258	1	1.01256	1
COX4I1	1	19	109795	815261	0.502135	0.390805	1
OR4B1	6	35	109790	815245	0.625718	1.27294	1
AC129492.1	1	2	109795	815278	0.315477	3.71272	1
HCAR3	4	35	109792	815245	1	0.848583	1
CRTAM	8	33	109788	815247	0.142904	1.80015	1
KDM2B	7	126	109789	815154	0.015195	0.412485	1
COL18A1	26	322	109770	814958	0.00992273	0.599473	1
OR6P1	5	19	109791	815261	0.196062	1.95417	1
CCDC116	9	44	109787	815236	0.283177	1.51887	1
CADPS2	8	76	109788	815204	0.614027	0.781614	1
CCDC114	7	79	109789	815201	0.402042	0.657926	1
RLF	0	101	109796	815179	6.9687e-06	0	0.123924
CCDC112	11	31	109785	815249	0.0133505	2.63498	1
MCF2L	13	157	109783	815123	0.0964373	0.614798	1
CCDC110	22	42	109774	815238	2.27397e-06	3.8897	0.0404379
MEI4	6	25	109790	815255	0.257655	1.78214	1
LEO1	8	35	109788	815245	0.16071	1.69728	1
MTCL1	17	207	109779	815073	0.0490848	0.609756	1
ATP1A4	15	84	109781	815196	0.348644	1.32601	1
ATP1A3	5	139	109791	815141	0.000685901	0.267068	1
ATP1A2	1	87	109795	815193	0.000378578	0.0853413	1
ATP1A1	1	79	109795	815201	0.000808453	0.0939843	1
TMEM211	1	8	109795	815272	1	0.928168	1
TMEM213	0	3	109796	815277	1	0	1
MGRN1	3	87	109793	815193	0.0082691	0.256028	1
CRTAP	7	49	109789	815231	0.836169	1.06079	1
SP8	4	58	109792	815222	0.238694	0.51208	1
SPHK1	6	38	109790	815242	0.642663	1.17244	1
DPT	5	17	109791	815263	0.173285	2.184	1
IPO11	9	58	109787	815222	0.70407	1.15222	1
CUEDC2	0	19	109796	815261	0.156598	0	1
IPO13	4	54	109792	815226	0.311144	0.550015	1
CPEB4	0	39	109796	815241	0.0118336	0	1
C11orf98	2	4	109794	815276	0.152804	3.71274	1
CPEB1	0	5	109796	815275	1	0	1
CPEB3	0	56	109796	815224	0.00144011	0	1
CPEB2	18	108	109778	815172	0.407179	1.23761	1
RBMXL1	4	22	109792	815258	0.541513	1.35008	1
CCDC43	7	11	109789	815269	0.00319995	4.72566	1
SRBD1	16	56	109780	815224	0.0157433	2.12171	1
ABAT	7	71	109789	815209	0.597699	0.732066	1
CDH20	2	77	109794	815203	0.00503613	0.192853	1
ZNF780A	14	35	109782	815245	0.00128051	2.97042	1
ZNF780B	10	35	109786	815245	0.0594874	2.12165	1
PRND	1	19	109795	815261	0.502135	0.390805	1
TP53TG5	3	15	109793	815265	0.465124	1.48509	1
RHEBL1	2	6	109794	815274	0.243948	2.47508	1
SIRPA	1	53	109795	815227	0.0182686	0.140094	1
IFT80	7	35	109789	815245	0.336223	1.4851	1
IFT81	14	25	109782	815255	9.02404e-05	4.15904	1
IFT88	15	42	109781	815238	0.00291046	2.65215	1
IL10RA	6	45	109790	815235	1	0.990054	1
POU5F1B	11	32	109785	815248	0.0144614	2.55276	1
CTCFL	6	54	109790	815226	0.841673	0.82506	1
NFATC2IP	7	31	109789	815249	0.207981	1.67674	1
XPA	13	22	109783	815258	0.000106993	4.38844	1
CNTF	0	0	109796	815280	1	0	1
MCM10	9	61	109787	815219	0.713749	1.0956	1
NUP93	14	74	109782	815206	0.246748	1.40485	1
CREBL2	0	10	109796	815270	0.619307	0	1
BPIFC	4	48	109792	815232	0.517612	0.618771	1
IGFBPL1	5	26	109791	815254	0.407498	1.42798	1
ZNF221	12	31	109784	815249	0.00344761	2.87456	1
ATG4C	12	29	109784	815251	0.00222424	3.07283	1
ATG4B	3	33	109793	815247	0.794914	0.675029	1
THUMPD2	6	38	109790	815242	0.642663	1.17244	1
ATG4D	15	35	109781	815245	0.000493958	3.18253	1
PHOX2A	3	28	109793	815252	1	0.795587	1
PHOX2B	0	39	109796	815241	0.0118336	0	1
STAT5A	3	57	109793	815223	0.111115	0.390794	1
LRGUK	16	55	109780	815225	0.00949591	2.16029	1
UPK2	0	23	109796	815257	0.102109	0	1
CFH	2	87	109794	815193	0.00257427	0.170684	1
CFI	12	44	109784	815236	0.0366482	2.02526	1
PNP	2	7	109794	815273	0.290487	2.12157	1
ANKFY1	4	99	109792	815181	0.00879566	0.299991	1
SMKR1	3	6	109793	815274	0.0810623	3.71277	1
CPM	2	23	109794	815257	0.761325	0.645682	1
CREBBP	1	254	109795	815026	8.24264e-13	0.0292401	1.46579e-08
PNN	8	44	109788	815236	0.392767	1.3501	1
ATP6V0E1	1	5	109795	815275	0.531429	1.48508	1
ATP6V0E2	1	28	109795	815252	0.247439	0.265187	1
OSER1	2	25	109794	815255	0.764243	0.594026	1
AAAS	17	41	109779	815239	0.000291166	3.07917	1
HAMP	2	8	109794	815272	0.336629	1.85633	1
EDC3	2	24	109794	815256	0.762216	0.618778	1
SIDT1	9	73	109787	815207	1	0.915444	1
SIDT2	11	82	109785	815198	1	0.996091	1
CSK	0	48	109796	815232	0.00549755	0	1
RP11-552F3.12	1	1	109795	815279	0.22329	7.4259	1
PYY	1	14	109795	815266	1	0.530383	1
SIX4	3	58	109793	815222	0.111538	0.384056	1
SIX5	12	112	109784	815168	0.577576	0.79557	1
SIX6	2	14	109794	815266	1	1.06079	1
MR1	9	32	109787	815248	0.0536559	2.0885	1
SIX2	1	26	109795	815254	0.363675	0.285586	1
SIX3	2	44	109794	815236	0.16644	0.337506	1
CNPY4	8	15	109788	815265	0.00369814	3.95998	1
CNPY3	4	17	109792	815263	0.303833	1.74718	1
CNPY2	4	12	109792	815268	0.11268	2.4751	1
CNPY1	1	3	109795	815277	0.396723	2.47506	1
PLCZ1	10	46	109786	815234	0.209908	1.61426	1
L34079.2	0	5	109796	815275	1	0	1
KNDC1	17	248	109779	815032	0.00423027	0.508924	1
HMG20A	3	20	109793	815260	0.749009	1.11378	1
HMG20B	2	35	109794	815245	0.310813	0.424298	1
GLT8D2	6	25	109790	815255	0.257655	1.78214	1
AAGAB	10	27	109786	815253	0.00930317	2.75031	1
RAB12	0	17	109796	815263	0.250916	0	1
C4orf19	2	15	109794	815265	1	0.990054	1
SLC7A6OS	3	20	109793	815260	0.749009	1.11378	1
C4orf17	4	18	109792	815262	0.322627	1.6501	1
CDH26	16	67	109780	815213	0.0589552	1.77334	1
C3orf70	8	18	109788	815262	0.00851495	3.30018	1
SHOX2	1	34	109795	815246	0.117666	0.218387	1
ZFP82	7	26	109789	815254	0.104295	1.99926	1
CHFR	6	63	109790	815217	0.574912	0.707166	1
RTBDN	4	24	109792	815256	0.567915	1.23758	1
SYPL1	1	11	109795	815269	1	0.675035	1
RCOR3	3	32	109793	815248	0.79315	0.696124	1
SYPL2	4	23	109792	815257	0.554175	1.29138	1
RFX8	9	32	109787	815248	0.0536559	2.0885	1
RFX4	1	62	109795	815218	0.00564508	0.119757	1
RFX5	3	33	109793	815247	0.794914	0.675029	1
RFX6	7	62	109789	815218	0.851932	0.838371	1
RFX7	2	94	109794	815186	0.00124351	0.157972	1
NRXN3	1	140	109795	815140	6.60333e-07	0.0530168	0.0117427
NRXN2	7	176	109789	815104	0.000218457	0.295284	1
NRXN1	0	159	109796	815121	3.75548e-09	0	6.67837e-05
RFX3	2	70	109794	815210	0.0103457	0.21214	1
YDJC	3	32	109793	815248	0.79315	0.696124	1
IBA57	11	44	109785	815236	0.0900798	1.8564	1
MYADML2	3	45	109793	815235	0.367369	0.495014	1
NLRP13	25	78	109771	815202	0.0005981	2.38024	1
APC	2	165	109794	815115	4.32172e-07	0.0899885	0.00768532
TMEM179B	7	13	109789	815267	0.00629396	3.998	1
ETV3L	4	41	109792	815239	0.816255	0.72442	1
UQCRC2	7	33	109789	815247	0.321606	1.57511	1
XPNPEP1	2	62	109794	815218	0.0307615	0.239516	1
UQCRC1	6	36	109790	815244	0.630501	1.23758	1
TEN1-CDK3	0	0	109796	815280	1	0	1
GGCX	12	66	109784	815214	0.37836	1.35011	1
PAPLN	28	144	109768	815136	0.077008	1.44394	1
RETSAT	8	46	109788	815234	0.524717	1.2914	1
TMEM218	0	16	109796	815264	0.245134	0	1
STXBP6	3	15	109793	815265	0.465124	1.48509	1
KHDRBS1	0	39	109796	815241	0.0118336	0	1
KHDRBS3	1	26	109795	815254	0.363675	0.285586	1
KHDRBS2	3	22	109793	815258	1	1.01256	1
NLRP12	33	93	109763	815187	1.04946e-05	2.63531	0.186626
PRPH	5	37	109791	815243	1	1.00343	1
AL031664.1	0	0	109796	815280	1	0	1
SLCO4A1	13	108	109783	815172	0.887877	0.893771	1
ZNF395	0	6	109796	815274	1	0	1
ZNHIT6	3	33	109793	815247	0.794914	0.675029	1
LHCGR	7	40	109789	815240	0.497191	1.29946	1
OR1Q1	6	18	109790	815262	0.0570894	2.47513	1
FLT3	7	67	109789	815213	0.717959	0.775781	1
VPS37B	8	23	109788	815257	0.0251403	2.58288	1
MKRN2OS	7	24	109789	815256	0.0871036	2.16582	1
ZBED4	7	129	109789	815151	0.0114043	0.402891	1
RP11-295P9.13	0	2	109796	815278	1	0	1
CTSG	5	23	109791	815257	0.372044	1.61424	1
DPYSL4	7	88	109789	815192	0.205149	0.590632	1
TARS2	12	46	109784	815234	0.0631677	1.93725	1
DPYSL2	0	57	109796	815223	0.00148153	0	1
DPYSL3	2	60	109794	815220	0.0298901	0.2475	1
OR4D9	10	26	109786	815254	0.00758003	2.85609	1
KRTAP10-12	7	34	109789	815246	0.32824	1.52879	1
KRTAP10-11	6	40	109790	815240	0.818315	1.11379	1
MRGPRE	3	50	109793	815230	0.203389	0.445509	1
IGFBP2	1	29	109795	815251	0.251562	0.256042	1
IGFBP3	0	38	109796	815242	0.0195299	0	1
LRFN1	1	68	109795	815212	0.00260376	0.109189	1
IGFBP1	5	18	109791	815262	0.183644	2.06268	1
BOP1	7	105	109789	815175	0.0776749	0.494996	1
IGFBP7	6	16	109790	815264	0.038819	2.78462	1
IGFBP4	3	27	109793	815253	1	0.825065	1
IGFBP5	1	25	109795	815255	0.357381	0.29701	1
MYRFL	14	40	109782	815240	0.00456789	2.59909	1
CYP1B1	8	37	109788	815243	0.243457	1.60553	1
MRGPRG	3	34	109793	815246	0.61722	0.655174	1
CKLF	2	14	109794	815266	1	1.06079	1
HNRNPA1L2	4	19	109792	815261	0.34297	1.56325	1
INS-IGF2	6	12	109790	815268	0.0145934	3.71284	1
RP11-637O19.3	0	3	109796	815277	1	0	1
GJA1	3	27	109793	815253	1	0.825065	1
GJA3	4	52	109792	815228	0.405458	0.57117	1
GJA4	4	24	109792	815256	0.567915	1.23758	1
GJA5	6	24	109790	815256	0.160304	1.85636	1
GJA8	10	37	109786	815243	0.0657493	2.007	1
GJA9	9	24	109787	815256	0.0125353	2.78467	1
B4GALT5	1	28	109795	815252	0.247439	0.265187	1
S1PR2	2	44	109794	815236	0.16644	0.337506	1
KDM3B	0	106	109796	815174	2.78811e-06	0	0.0495809
ZNF117	16	35	109780	815245	0.000182797	3.39455	1
ZNF114	16	30	109780	815250	4.51843e-05	3.9602	0.803512
KDM3A	8	96	109788	815184	0.225119	0.618757	1
ZNF112	8	47	109788	815233	0.529662	1.26392	1
OR4D2	5	16	109791	815264	0.094767	2.32049	1
PPP6R3	2	53	109794	815227	0.0597343	0.280191	1
ITGA8	10	82	109786	815198	0.872826	0.905516	1
DYX1C1	15	27	109781	815253	5.46231e-05	4.12608	0.971363
KIAA1958	2	55	109794	815225	0.0614147	0.270002	1
APIP	5	10	109791	815270	0.025374	3.71282	1
TMC1	11	42	109785	815238	0.0545419	1.94493	1
TMC2	19	80	109777	815200	0.0295018	1.76366	1
TMC3	12	76	109784	815204	0.619495	1.17245	1
EIF2B4	8	36	109788	815244	0.237225	1.65013	1
EIF2B5	7	45	109789	815235	0.668309	1.15506	1
EIF2B2	6	26	109790	815254	0.265575	1.71359	1
EIF2B3	4	26	109792	815254	0.775998	1.14236	1
MIEF1	4	36	109792	815244	1	0.825063	1
EIF2B1	3	16	109793	815264	0.486797	1.39227	1
PRKAR2A	3	29	109793	815251	1	0.768143	1
PRKAR2B	1	34	109795	815246	0.117666	0.218387	1
OR4D6	3	24	109793	815256	1	0.928166	1
TXNIP	8	24	109788	815256	0.0476751	2.47516	1
S1PR4	1	64	109795	815216	0.00592509	0.116014	1
MLF1	10	17	109786	815263	0.000683943	4.3685	1
QPRT	3	21	109793	815259	0.75869	1.06079	1
IFT140	22	196	109774	815084	0.46449	0.833458	1
RSPH9	8	17	109788	815263	0.00656764	3.49479	1
TMEM14C	3	9	109793	815271	0.162796	2.47509	1
TMEM14B	1	8	109795	815272	1	0.928168	1
TMEM14A	0	7	109796	815273	1	0	1
FANCF	7	44	109789	815236	0.663543	1.18132	1
MECOM	0	84	109796	815196	5.37804e-05	0	0.956378
RSPH3	9	40	109787	815240	0.179932	1.67076	1
FUT1	5	24	109791	815256	0.382275	1.54698	1
FANCE	4	39	109792	815241	0.813613	0.761573	1
RTEL1	0	0	109796	815280	1	0	1
SOX6	0	48	109796	815232	0.00549755	0	1
GOSR2	3	17	109793	815263	0.724638	1.31037	1
LURAP1	1	3	109795	815277	0.396723	2.47506	1
TPBGL	8	43	109788	815237	0.384808	1.38149	1
C9orf129	3	20	109793	815260	0.749009	1.11378	1
MYT1L	0	98	109796	815182	6.29497e-06	0	0.111944
CFHR2	0	2	109796	815278	1	0	1
PHACTR4	4	38	109792	815242	0.813103	0.781622	1
CLIC4	0	12	109796	815268	0.382354	0	1
CFHR1	6	17	109790	815263	0.0474123	2.62082	1
PHACTR1	2	53	109794	815227	0.0597343	0.280191	1
OR2K2	3	21	109793	815259	0.75869	1.06079	1
CFHR4	14	56	109782	815224	0.0419357	1.85642	1
CFHR5	14	43	109782	815237	0.00661204	2.41773	1
LRFN5	6	47	109790	815233	1	0.947917	1
CLEC1A	9	16	109787	815264	0.00159615	4.17745	1
RIT2	4	11	109792	815269	0.0928561	2.70021	1
TMEM147	3	21	109793	815259	0.75869	1.06079	1
ENY2	0	4	109796	815276	1	0	1
TMOD3	1	26	109795	815254	0.363675	0.285586	1
TMEM144	2	23	109794	815257	0.761325	0.645682	1
FOXL2	0	48	109796	815232	0.00549755	0	1
ITGA6	8	84	109788	815196	0.421411	0.707161	1
TMEM141	1	6	109795	815274	0.587044	1.23757	1
TMEM140	3	16	109793	815264	0.486797	1.39227	1
SF1	7	73	109789	815207	0.489691	0.712007	1
BPNT1	8	11	109788	815269	0.000881849	5.40063	1
ITGA7	14	97	109782	815183	0.769224	1.07174	1
API5	2	27	109794	815253	0.571004	0.550023	1
OR52I1	7	21	109789	815259	0.0413225	2.47515	1
AC023908.1	0	1	109796	815279	1	0	1
RTKN2	17	31	109779	815249	2.00953e-05	4.07292	0.357355
HAS1	2	56	109794	815224	0.0423185	0.26518	1
SOWAHA	8	60	109788	815220	1	0.990053	1
SOWAHB	15	69	109781	815211	0.0921235	1.61429	1
SOWAHC	12	35	109784	815245	0.0101316	2.54617	1
FANCI	24	106	109772	815174	0.0287017	1.68137	1
OR5AN1	7	29	109789	815251	0.189635	1.79239	1
FAM32A	0	10	109796	815270	0.619307	0	1
HAS3	4	67	109792	815213	0.138847	0.443287	1
ABHD14A-ACY1	0	0	109796	815280	1	0	1
KIAA1191	6	21	109790	815259	0.125677	2.12161	1
FER1L6	32	126	109764	815154	0.00280793	1.886	1
VMP1	1	28	109795	815252	0.247439	0.265187	1
FER1L5	20	164	109776	815116	0.81931	0.905508	1
ZNF559	36	32	109760	815248	2.38934e-16	8.35575	4.24896e-12
RP11-96O20.4	0	0	109796	815280	1	0	1
ZMAT3	1	16	109795	815264	0.71206	0.464083	1
ZMAT2	0	12	109796	815268	0.382354	0	1
TSNAX-DISC1	0	0	109796	815280	1	0	1
ZMAT4	1	23	109795	815257	0.35187	0.322838	1
C19orf24	4	24	109792	815256	0.567915	1.23758	1
C19orf25	1	21	109795	815259	0.506512	0.353585	1
MYBL1	4	40	109792	815240	0.814675	0.742532	1
SMOC2	6	58	109790	815222	0.698942	0.768136	1
NR1D2	4	41	109792	815239	0.816255	0.72442	1
DRD1	2	26	109794	815254	0.767292	0.571178	1
ITGB1BP1	4	12	109792	815268	0.11268	2.4751	1
CTD-2369P2.10	0	3	109796	815277	1	0	1
ZNF7	13	54	109783	815226	0.0849965	1.78769	1
CTD-2369P2.12	2	23	109794	815257	0.761325	0.645682	1
ZNF2	3	34	109793	815246	0.61722	0.655174	1
ZNF3	5	27	109791	815253	0.422089	1.37509	1
TIPIN	4	16	109792	815264	0.286908	1.85635	1
ALDOC	4	18	109792	815262	0.322627	1.6501	1
PHLDA1	5	35	109791	815245	0.808045	1.06079	1
ZNF8	0	2	109796	815278	1	0	1
MPRIP	5	178	109791	815102	1.65494e-05	0.208543	0.294299
C11orf16	8	34	109788	815246	0.15128	1.7472	1
EPN2	4	67	109792	815213	0.138847	0.443287	1
ZAP70	9	53	109787	815227	0.553071	1.26094	1
TXNRD3NB	4	6	109792	815274	0.0230647	4.95051	1
SYNDIG1	1	36	109795	815244	0.120983	0.206254	1
AC068533.7	0	0	109796	815280	1	0	1
CDC5L	1	54	109795	815226	0.0189064	0.1375	1
NEMP1	1	23	109795	815257	0.35187	0.322838	1
RAC3	1	20	109795	815260	0.502998	0.371265	1
NEMP2	13	24	109783	815256	0.00020526	4.02293	1
SBDS	3	19	109793	815261	0.739971	1.17243	1
VCL	5	55	109791	815225	0.548017	0.675023	1
CPLX2	1	12	109795	815268	1	0.618781	1
CPLX3	3	14	109793	815266	0.444804	1.59116	1
CPLX1	0	16	109796	815264	0.245134	0	1
AP2A1	2	113	109794	815167	0.000126355	0.131407	1
CRYBA1	5	19	109791	815261	0.196062	1.95417	1
AP2A2	0	4	109796	815276	1	0	1
NIM1K	4	31	109792	815249	1	0.958113	1
CADPS	8	122	109788	815158	0.0416312	0.486875	1
FIGNL1	14	26	109782	815254	0.000123707	3.99819	1
PBX3	1	34	109795	815246	0.117666	0.218387	1
PBX1	0	24	109796	815256	0.105294	0	1
AIRE	10	80	109786	815200	1	0.928162	1
NSUN3	5	20	109791	815260	0.210339	1.85635	1
NSUN2	8	59	109788	815221	1	1.00684	1
NSUN5	8	36	109788	815244	0.237225	1.65013	1
NSUN4	0	2	109796	815278	1	0	1
NSUN7	13	47	109783	815233	0.0266838	2.05398	1
NSUN6	8	30	109788	815250	0.124624	1.98024	1
PRAMEF4	10	53	109786	815227	0.327587	1.40105	1
PRAMEF6	5	28	109791	815252	0.585814	1.32598	1
PRAMEF7	4	17	109792	815263	0.303833	1.74718	1
FAM71F1	6	24	109790	815256	0.160304	1.85636	1
PRAMEF1	9	54	109787	815226	0.556796	1.23759	1
PRAMEF2	4	62	109792	815218	0.181761	0.47904	1
FAM71F2	0	0	109796	815280	1	0	1
PTCH2	15	110	109781	815170	0.890544	1.01256	1
PTCH1	4	157	109792	815123	2.59452e-05	0.189153	0.461383
PRAMEF9	1	3	109795	815277	0.396723	2.47506	1
TUFM	3	42	109793	815238	0.36112	0.530374	1
KMT5B	1	68	109795	815212	0.00260376	0.109189	1
RAD9B	7	18	109789	815262	0.0229752	2.88778	1
RAD9A	7	33	109789	815247	0.321606	1.57511	1
KMT5A	0	38	109796	815242	0.0195299	0	1
ERGIC2	4	20	109792	815260	0.52037	1.48509	1
ERGIC3	2	35	109794	815245	0.310813	0.424298	1
CDR2L	5	26	109791	815254	0.407498	1.42798	1
ERGIC1	2	37	109794	815243	0.316425	0.401362	1
CEP78	6	49	109790	815231	1	0.909217	1
CLEC14A	3	50	109793	815230	0.203389	0.445509	1
CLU	4	44	109792	815236	0.653585	0.675026	1
B3GAT3	2	24	109794	815256	0.762216	0.618778	1
B3GAT2	3	23	109793	815257	1	0.968529	1
B3GAT1	1	30	109795	815250	0.170211	0.247507	1
USMG5	1	8	109795	815272	1	0.928168	1
CPPED1	5	42	109791	815238	1	0.883954	1
CALM2	0	6	109796	815274	1	0	1
TTC30A	13	64	109783	815216	0.213724	1.50834	1
TTC30B	11	63	109785	815217	0.373312	1.29653	1
SPG20	13	44	109783	815236	0.0210789	2.19401	1
GSDMA	11	40	109785	815240	0.0471043	2.04212	1
GSDMB	8	24	109788	815256	0.0476751	2.47516	1
GSDMC	8	47	109788	815233	0.529662	1.26392	1
HRH4	4	21	109792	815259	0.530162	1.41437	1
UPK1B	6	12	109790	815268	0.0145934	3.71284	1
CCDC186	6	58	109790	815222	0.698942	0.768136	1
DLGAP3	0	102	109796	815178	4.15919e-06	0	0.0739628
DLGAP1	0	88	109796	815192	2.19671e-05	0	0.390641
DLGAP4	1	115	109795	815165	1.70519e-05	0.0645603	0.303235
DLGAP5	12	47	109784	815233	0.0655218	1.89586	1
BRDT	11	39	109785	815241	0.0442284	2.09447	1
MBNL1	1	36	109795	815244	0.120983	0.206254	1
MBNL2	1	35	109795	815245	0.118648	0.212147	1
NPEPL1	0	5	109796	815275	1	0	1
CYP27B1	12	41	109784	815239	0.0296536	2.17342	1
SEMA7A	3	45	109793	815235	0.367369	0.495014	1
CDX2	1	28	109795	815252	0.247439	0.265187	1
OIP5	7	15	109789	815265	0.0111926	3.46569	1
CLCN3	2	53	109794	815227	0.0597343	0.280191	1
CLCN2	15	74	109781	815206	0.141425	1.50521	1
CLCN1	14	75	109782	815205	0.25119	1.38612	1
FBXL16	1	55	109795	815225	0.0121807	0.135	1
APPL2	11	47	109785	815233	0.102696	1.73793	1
CLCN6	11	108	109785	815172	0.477539	0.756267	1
FBXL19	3	75	109793	815205	0.0224051	0.296997	1
INO80B-WBP1	0	2	109796	815278	1	0	1
BRD8	6	63	109790	815217	0.574912	0.707166	1
BRD9	8	84	109788	815196	0.421411	0.707161	1
PCDHGA1	9	88	109787	815192	0.530311	0.759397	1
BRD4	2	140	109794	815140	6.04747e-06	0.106061	0.107542
BRD7	2	34	109794	815246	0.310569	0.436778	1
BRD1	2	148	109794	815132	2.93629e-06	0.100327	0.0522161
ABHD16B	16	57	109780	815223	0.0164623	2.0845	1
BRD3	1	100	109795	815180	7.74889e-05	0.0742457	1
DNAJA2	0	27	109796	815253	0.067403	0	1
SETD1A	17	218	109779	815062	0.026127	0.578981	1
PTPN18	9	27	109787	815253	0.032682	2.47517	1
DNAJA4	7	31	109789	815249	0.207981	1.67674	1
LYRM2	2	2	109794	815278	0.0717412	7.42596	1
PTPN13	23	135	109773	815145	0.323461	1.26512	1
PTPN12	1	38	109795	815242	0.0812942	0.195398	1
PTPN11	1	45	109795	815235	0.0383157	0.165002	1
MCUB	10	22	109786	815258	0.00299543	3.37515	1
MYCBP	0	2	109796	815278	1	0	1
PTPN14	10	106	109786	815174	0.317486	0.700483	1
GALR3	8	40	109788	815240	0.269197	1.48511	1
GALR2	4	26	109792	815254	0.775998	1.14236	1
MAGEL2	8	123	109788	815157	0.0417717	0.482916	1
UTRN	36	195	109760	815085	0.0836893	1.37096	1
LYAR	9	36	109787	815244	0.103324	1.85639	1
PCDH20	4	68	109792	815212	0.102826	0.436768	1
CH25H	6	24	109790	815256	0.160304	1.85636	1
C16orf74	0	15	109796	815265	0.243147	0	1
MRPL24	4	13	109792	815267	0.134184	2.28468	1
MRPL27	1	13	109795	815267	1	0.571182	1
MRPL21	1	16	109795	815264	0.71206	0.464083	1
MRPL20	3	11	109793	815269	0.22648	2.02517	1
C16orf72	1	29	109795	815251	0.251562	0.256042	1
MRPL22	5	18	109791	815262	0.183644	2.06268	1
GAB4	7	63	109789	815217	0.852668	0.825058	1
LRFN4	3	96	109793	815184	0.00292557	0.232023	1
GAB2	32	66	109764	815214	5.13911e-08	3.60103	0.000913888
OR4L1	5	21	109791	815259	0.226279	1.76798	1
GAB1	0	55	109796	815225	0.00143621	0	1
C2orf81	15	47	109781	815233	0.00555419	2.36999	1
C2orf80	5	10	109791	815270	0.025374	3.71282	1
DMRTB1	3	37	109793	815243	0.621916	0.60205	1
C2orf82	3	19	109793	815261	0.739971	1.17243	1
ZSCAN9	14	20	109782	815260	1.48452e-05	5.19837	0.263992
ZNF852	8	40	109788	815240	0.269197	1.48511	1
HABP2	13	50	109783	815230	0.0476736	1.93081	1
NKX2-3	0	42	109796	815238	0.00774066	0	1
C2orf88	2	5	109794	815275	0.197743	2.9702	1
NDRG2	0	36	109796	815244	0.0181632	0	1
NDRG3	2	12	109794	815268	0.678471	1.23757	1
NDRG4	2	29	109794	815251	0.575387	0.512089	1
ZSCAN2	6	55	109790	815225	0.842377	0.810053	1
SRSF5	1	21	109795	815259	0.506512	0.353585	1
SRSF4	2	38	109794	815242	0.225961	0.3908	1
SRSF7	1	14	109795	815266	1	0.530383	1
SRSF6	3	35	109793	815245	0.617587	0.636454	1
SRSF1	0	16	109796	815264	0.245134	0	1
CHD1L	22	56	109774	815224	7.62787e-05	2.91751	1
SRSF3	0	16	109796	815264	0.245134	0	1
MSMP	0	0	109796	815280	1	0	1
MZB1	6	22	109790	815258	0.135767	2.0252	1
SRSF9	3	17	109793	815263	0.724638	1.31037	1
SRSF8	5	29	109791	815251	0.592943	1.28025	1
RNF130	2	37	109794	815243	0.316425	0.401362	1
RAPH1	10	113	109786	815167	0.262778	0.657085	1
VIL1	15	73	109781	815207	0.137169	1.52583	1
RNF133	12	22	109784	815258	0.000341324	4.05102	1
PTPN2	2	19	109794	815261	1	0.781626	1
MSMB	0	4	109796	815276	1	0	1
DNAJB14	6	22	109790	815258	0.135767	2.0252	1
RNF138	0	17	109796	815263	0.250916	0	1
RNF139	7	45	109789	815235	0.668309	1.15506	1
ENOSF1	6	37	109790	815243	0.636178	1.20413	1
BCR	6	140	109790	815140	0.00191118	0.318195	1
CDK5	2	15	109794	815265	1	0.990054	1
CISD2	1	7	109795	815273	1	1.06079	1
CISD1	0	11	109796	815269	0.63094	0	1
CLNS1A	2	17	109794	815263	1	0.873554	1
CDK6	0	15	109796	815265	0.243147	0	1
R3HDML	1	23	109795	815257	0.35187	0.322838	1
TSHZ2	3	93	109793	815187	0.00413308	0.239509	1
TSHZ3	3	120	109793	815160	0.000373061	0.185613	1
EIF4E1B	2	18	109794	815262	1	0.825066	1
GID8	1	19	109795	815261	0.502135	0.390805	1
TRMT12	7	20	109789	815260	0.0344063	2.59899	1
FOXS1	3	31	109793	815249	0.792117	0.718581	1
VILL	11	69	109785	815211	0.602595	1.18378	1
ZNF581	2	15	109794	815265	1	0.990054	1
LPAR2	3	29	109793	815251	1	0.768143	1
MCOLN1	5	72	109791	815208	0.161266	0.515632	1
ZNF582	11	28	109785	815252	0.00458926	2.91732	1
TIPARP	3	35	109793	815245	0.617587	0.636454	1
ZNF584	7	25	109789	815255	0.0951194	2.0792	1
ZNF587	15	46	109781	815234	0.00483212	2.4215	1
CDK9	2	7	109794	815273	0.290487	2.12157	1
ZNF589	10	9	109786	815271	1.84182e-05	8.2509	0.32753
THSD1	10	62	109786	815218	0.583376	1.19766	1
SGK494	5	22	109791	815258	0.243689	1.68762	1
ASUN	2	42	109794	815238	0.163354	0.353579	1
KRTAP24-1	3	22	109793	815258	1	1.01256	1
LPAR6	8	19	109788	815261	0.0108634	3.12667	1
LSM12	0	9	109796	815271	0.611234	0	1
PSD	4	87	109792	815193	0.0226366	0.341374	1
CAMKK2	6	66	109790	815214	0.46549	0.67502	1
CAMKK1	5	56	109791	815224	0.550131	0.662968	1
MYDGF	6	20	109790	815260	0.117171	2.22769	1
LRIG3	13	81	109783	815199	0.523805	1.19175	1
LPAR5	2	30	109794	815250	0.579915	0.495019	1
OLFML1	4	24	109792	815256	0.567915	1.23758	1
MTRF1L	12	26	109784	815254	0.00107025	3.42706	1
MYO1H	17	69	109779	815211	0.0297093	1.82957	1
MYO1G	7	73	109789	815207	0.489691	0.712007	1
MYO1F	8	123	109788	815157	0.0417717	0.482916	1
MYO1E	4	97	109792	815183	0.0125496	0.306177	1
MYO1D	15	77	109781	815203	0.195443	1.44656	1
MYO1C	7	140	109789	815140	0.00476195	0.37123	1
MYO1B	8	78	109788	815202	0.615697	0.761564	1
MYO1A	24	82	109772	815198	0.00220659	2.17355	1
GRN	8	69	109788	815211	0.859979	0.860882	1
MTFP1	0	12	109796	815268	0.382354	0	1
LCN6	3	14	109793	815266	0.444804	1.59116	1
PARD6G	4	44	109792	815236	0.653585	0.675026	1
CHMP3	2	14	109794	815266	1	1.06079	1
RPL36AL	4	10	109792	815270	0.0748608	2.97024	1
RAET1G	5	36	109791	815244	0.812539	1.03131	1
KIAA0391	7	23	109789	815257	0.0802876	2.25998	1
CHMP7	2	40	109794	815240	0.228723	0.371259	1
CHMP6	0	24	109796	815256	0.105294	0	1
CHMP5	2	9	109794	815271	0.381813	1.65009	1
DENND6A	5	33	109791	815247	0.800388	1.12504	1
OR52N4	2	24	109794	815256	0.762216	0.618778	1
PGBD5	0	61	109796	815219	0.00100792	0	1
PGBD2	12	44	109784	815236	0.0366482	2.02526	1
PGBD3	5	37	109791	815243	1	1.00343	1
CTPS1	3	29	109793	815251	1	0.768143	1
LGALSL	2	12	109794	815268	0.678471	1.23757	1
SULT6B1	8	21	109788	815259	0.016941	2.82886	1
HOXA13	1	54	109795	815226	0.0189064	0.1375	1
TOMM20L	4	13	109792	815267	0.134184	2.28468	1
HOXA11	2	34	109794	815246	0.310569	0.436778	1
HOXA10	2	51	109794	815229	0.0854185	0.29118	1
PPIAL4A	2	17	109794	815263	1	0.873554	1
BPI	5	49	109791	815231	0.67727	0.757684	1
PPIAL4C	2	15	109794	815265	1	0.990054	1
KRTAP19-1	1	8	109795	815272	1	0.928168	1
KRTAP19-6	0	1	109796	815279	1	0	1
PPIAL4D	2	7	109794	815273	0.290487	2.12157	1
PPIAL4G	0	11	109796	815269	0.63094	0	1
CEP57	7	37	109789	815243	0.355826	1.40483	1
FAM160B1	7	53	109789	815227	1	0.980712	1
IRGQ	3	55	109793	815225	0.152202	0.405006	1
FAM160B2	12	82	109784	815198	0.749757	1.08669	1
NUBP2	7	43	109789	815237	0.659462	1.2088	1
GALNTL5	9	30	109787	815250	0.0432434	2.22772	1
ZNF324	7	92	109789	815188	0.162037	0.56495	1
TSSK4	5	21	109791	815259	0.226279	1.76798	1
ZNF326	5	25	109791	815255	0.394161	1.4851	1
SRF	0	47	109796	815233	0.00522858	0	1
TSSK3	6	19	109790	815261	0.110345	2.34481	1
ZNF322	8	14	109788	815266	0.00268888	4.24369	1
LCN9	2	23	109794	815257	0.761325	0.645682	1
FAM214B	5	46	109791	815234	0.829082	0.807118	1
SRI	4	11	109792	815269	0.0928561	2.70021	1
ZNF329	10	42	109786	815238	0.127777	1.76802	1
SRL	1	5	109795	815275	0.531429	1.48508	1
SRM	2	18	109794	815262	1	0.825066	1
SRR	4	7	109792	815273	0.0328983	4.24357	1
LGALS9	3	23	109793	815257	1	0.968529	1
LGALS8	8	17	109788	815263	0.00656764	3.49479	1
SF3B3	3	82	109793	815198	0.0114952	0.271641	1
LGALS3	3	20	109793	815260	0.749009	1.11378	1
LGALS2	1	6	109795	815274	0.587044	1.23757	1
LGALS1	1	9	109795	815271	1	0.825068	1
SPECC1	14	79	109782	815201	0.335147	1.31593	1
LGALS7	0	1	109796	815279	1	0	1
CFAP36	7	20	109789	815260	0.0344063	2.59899	1
LGALS4	4	38	109792	815242	0.813103	0.781622	1
NMU	0	12	109796	815268	0.382354	0	1
NMS	4	8	109792	815272	0.0448148	3.71279	1
AKIRIN1	1	16	109795	815264	0.71206	0.464083	1
EIF2AK1	12	48	109784	815232	0.0684718	1.85641	1
MTG2	5	62	109791	815218	0.344791	0.598806	1
EIF2AK3	13	52	109783	815228	0.0530765	1.85642	1
EIF2AK2	9	28	109787	815252	0.0355388	2.38684	1
TDG	8	12	109788	815268	0.00131746	4.95066	1
EIF2AK4	22	92	109774	815188	0.0197275	1.77579	1
HN1	2	13	109794	815267	0.696393	1.14236	1
NMB	1	12	109795	815268	1	0.618781	1
EREG	2	17	109794	815263	1	0.873554	1
FAM136A	7	14	109789	815266	0.00848689	3.71287	1
MYO16	6	173	109790	815107	0.00010709	0.257488	1
TRNT1	15	27	109781	815253	5.46231e-05	4.12608	0.971363
ASAP1	3	80	109793	815200	0.0162299	0.278433	1
ASAP2	6	91	109790	815189	0.0851584	0.48956	1
NMI	8	14	109788	815266	0.00268888	4.24369	1
ARHGAP33	16	107	109780	815173	0.67544	1.11033	1
ATG101	2	15	109794	815265	1	0.990054	1
PLAUR	2	26	109794	815254	0.767292	0.571178	1
KRT28	10	33	109786	815247	0.030906	2.25023	1
HILPDA	0	6	109796	815274	1	0	1
LOR	6	33	109790	815247	0.457451	1.35009	1
LRRC26	3	23	109793	815257	1	0.968529	1
KIAA1524	14	58	109782	815222	0.0649187	1.79244	1
LRRC24	0	0	109796	815280	1	0	1
KIAA1522	12	93	109784	815187	1	0.95811	1
SLCO1B7	7	39	109789	815241	0.490513	1.33278	1
LRRC20	4	19	109792	815261	0.34297	1.56325	1
SIGLEC5	1	0	109795	815280	0.118689	Inf	1
LOX	2	39	109794	815241	0.226592	0.380779	1
LPGAT1	3	17	109793	815263	0.724638	1.31037	1
FLYWCH1	14	151	109782	815129	0.227164	0.688409	1
LRRC29	3	12	109793	815268	0.410177	1.85634	1
LRRC28	8	27	109788	815253	0.0610605	2.20021	1
GCNT4	3	24	109793	815256	1	0.928166	1
NXN	1	44	109795	815236	0.0382351	0.168752	1
TIMM17A	5	8	109791	815272	0.0133083	4.64124	1
GCNT1	7	31	109789	815249	0.207981	1.67674	1
GCNT3	10	40	109786	815240	0.0806128	1.85639	1
GCNT2	10	31	109786	815249	0.0249287	2.39541	1
AACS	11	72	109785	815208	0.613986	1.13443	1
PARD6B	1	29	109795	815251	0.251562	0.256042	1
C14orf132	0	14	109796	815266	0.397012	0	1
LPCAT4	3	32	109793	815248	0.79315	0.696124	1
LPCAT2	7	43	109789	815237	0.659462	1.2088	1
LPCAT3	1	17	109795	815263	0.714515	0.436783	1
LPCAT1	0	5	109796	815275	1	0	1
SPNS1	6	63	109790	815217	0.574912	0.707166	1
PIGB	6	26	109790	815254	0.265575	1.71359	1
PIGC	8	12	109788	815268	0.00131746	4.95066	1
PIGF	2	13	109794	815267	0.696393	1.14236	1
CALCRL	5	20	109791	815260	0.210339	1.85635	1
PIGH	5	10	109791	815270	0.025374	3.71282	1
PIGK	5	18	109791	815262	0.183644	2.06268	1
PIGL	6	18	109790	815262	0.0570894	2.47513	1
PIGM	7	24	109789	815256	0.0871036	2.16582	1
PIGN	19	66	109777	815214	0.00626693	2.13782	1
PIGO	18	81	109778	815199	0.0609471	1.65019	1
PIGP	4	13	109792	815267	0.134184	2.28468	1
PIGQ	15	101	109781	815179	0.667759	1.10276	1
PIGR	5	72	109791	815208	0.161266	0.515632	1
CNIH2	0	14	109796	815266	0.397012	0	1
ILKAP	4	32	109792	815248	1	0.928166	1
P2RY11	18	66	109778	815214	0.0108276	2.02531	1
PIGV	11	34	109785	815246	0.0176632	2.40246	1
PIGX	2	20	109794	815260	1	0.742536	1
PIGY	0	0	109796	815280	1	0	1
PIGZ	16	79	109780	815201	0.15075	1.50394	1
KRT25	9	34	109787	815246	0.0921307	1.9657	1
TMEM80	2	18	109794	815262	1	0.825066	1
SRRM5	21	40	109775	815240	3.73252e-06	3.8985	0.0663755
JCHAIN	0	11	109796	815269	0.63094	0	1
TAX1BP1	12	50	109784	815230	0.0761381	1.78218	1
SNAPC3	11	36	109785	815244	0.022268	2.26906	1
OSGEP	4	20	109792	815260	0.52037	1.48509	1
ALPP	14	82	109782	815198	0.427989	1.26779	1
RHPN1	7	85	109789	815195	0.258448	0.61148	1
CHST11	1	32	109795	815248	0.173009	0.232037	1
OLR1	5	4	109791	815276	0.00196054	9.28146	1
SERPINB8	3	30	109793	815250	0.791871	0.742534	1
SRRM1	0	66	109796	815214	0.000409744	0	1
CCDC171	31	99	109765	815181	0.000118678	2.32548	1
SRRM3	1	73	109795	815207	0.00178361	0.10171	1
CCDC173	21	29	109775	815251	7.62888e-08	5.37788	0.00135664
CCDC174	8	24	109788	815256	0.0476751	2.47516	1
SRRM4	4	56	109792	815224	0.314656	0.53037	1
CCDC177	8	80	109788	815200	0.511028	0.742522	1
PDK1	11	35	109785	815245	0.0197826	2.33377	1
SUN2	8	74	109788	815206	0.731814	0.802748	1
PDK2	5	29	109791	815251	0.592943	1.28025	1
SLFN11	20	62	109776	815218	0.00160958	2.39553	1
PDK4	5	12	109791	815268	0.0427947	3.09404	1
LNPEP	6	37	109790	815243	0.636178	1.20413	1
MYO5C	26	117	109770	815163	0.0268936	1.65024	1
ALPI	5	59	109791	815221	0.437727	0.629256	1
MIEF2	6	50	109790	815230	1	0.891027	1
SEC61A1	1	39	109795	815241	0.082502	0.190388	1
SEC61A2	4	28	109792	815252	0.787448	1.06079	1
ALPL	5	64	109791	815216	0.348661	0.580092	1
PTGS2	0	43	109796	815237	0.00781786	0	1
PECR	6	13	109790	815267	0.0192278	3.42692	1
ADCK5	4	86	109792	815194	0.0319581	0.345344	1
CKAP2	15	41	109781	815239	0.00263479	2.71684	1
TBX6	3	39	109793	815241	0.475287	0.571174	1
RGL4	9	42	109787	815238	0.194294	1.5912	1
OGFRL1	9	39	109787	815241	0.174313	1.71361	1
PUF60	0	1	109796	815279	1	0	1
ZFAND4	11	50	109785	815230	0.161224	1.63364	1
ZFAND3	1	25	109795	815255	0.357381	0.29701	1
ZFAND1	5	15	109791	815265	0.0796521	2.47512	1
MYO5B	17	146	109779	815134	0.715719	0.864557	1
OR11G2	10	24	109786	815256	0.00487762	3.09413	1
SUN5	3	26	109793	815254	1	0.856747	1
SLC39A12	10	41	109786	815239	0.123773	1.81114	1
SLC39A13	2	42	109794	815238	0.163354	0.353579	1
SLC39A10	5	28	109791	815252	0.585814	1.32598	1
SLC39A11	1	32	109795	815248	0.173009	0.232037	1
SLC39A14	1	45	109795	815235	0.0383157	0.165002	1
DNAJC17	3	21	109793	815259	0.75869	1.06079	1
INMT-FAM188B	0	0	109796	815280	1	0	1
CEP120	11	46	109785	815234	0.0977602	1.77571	1
NTRK1	5	85	109791	815195	0.0713716	0.436763	1
NTRK2	0	68	109796	815212	0.000447321	0	1
RSBN1	6	58	109790	815222	0.698942	0.768136	1
EIF1AD	1	8	109795	815272	1	0.928168	1
ARHGAP22	8	86	109788	815194	0.423413	0.690714	1
ARHGAP21	9	118	109787	815162	0.100282	0.56631	1
ARHGAP20	12	76	109784	815204	0.619495	1.17245	1
ARHGAP26	1	48	109795	815232	0.0261436	0.154688	1
ARHGAP25	6	42	109790	815238	0.823722	1.06079	1
EVI5	4	43	109792	815237	0.651899	0.690725	1
NARFL	6	72	109790	815208	0.297217	0.618764	1
ARHGAP29	8	66	109788	815214	1	0.900028	1
ARHGAP28	19	49	109777	815231	0.000261689	2.87956	1
OR9Q2	3	31	109793	815249	0.792117	0.718581	1
TBX4	2	74	109794	815206	0.00722261	0.200672	1
HHAT	10	43	109786	815237	0.132696	1.7269	1
DDIT4	5	17	109791	815263	0.173285	2.184	1
FAM76B	1	25	109795	815255	0.357381	0.29701	1
TECRL	14	18	109782	815262	6.33998e-06	5.77592	0.112744
FAM76A	1	13	109795	815267	1	0.571182	1
RIIAD1	1	10	109795	815270	1	0.742539	1
OR9Q1	3	24	109793	815256	1	0.928166	1
SMAD2	1	16	109795	815264	0.71206	0.464083	1
MYSM1	10	56	109786	815224	0.443266	1.32599	1
PPIB	4	14	109792	815266	0.260073	2.12159	1
ATG2A	20	221	109776	815059	0.0903904	0.671923	1
ATG2B	16	116	109780	815164	0.892957	1.0242	1
GPR3	4	27	109792	815253	0.781433	1.10003	1
BMP6	0	56	109796	815224	0.00144011	0	1
GPR1	7	18	109789	815262	0.0229752	2.88778	1
BMP4	3	29	109793	815251	1	0.768143	1
BMP3	2	45	109794	815235	0.117444	0.330006	1
GPR6	2	36	109794	815244	0.312795	0.412512	1
BMP1	3	103	109793	815177	0.00145542	0.216253	1
MUS81	6	32	109790	815248	0.448195	1.39228	1
DR1	0	5	109796	815275	1	0	1
MTURN	1	14	109795	815266	1	0.530383	1
OR5R1	4	23	109792	815257	0.554175	1.29138	1
C1orf35	8	34	109788	815246	0.15128	1.7472	1
SWT1	0	40	109796	815240	0.0120464	0	1
GOLGA8M	0	5	109796	815275	1	0	1
TERF1	2	31	109794	815249	0.423245	0.47905	1
GOLGA8H	0	1	109796	815279	1	0	1
GOLGA8K	3	17	109793	815263	0.724638	1.31037	1
NDUFAF1	4	25	109792	815255	0.771248	1.18807	1
GZF1	8	52	109788	815228	0.689277	1.14236	1
FEM1A	3	56	109793	815224	0.15431	0.397773	1
GOLGA8A	5	27	109791	815253	0.422089	1.37509	1
GOLGA8B	1	15	109795	815265	0.71172	0.495023	1
MARCH11	3	42	109793	815238	0.36112	0.530374	1
RASSF8	5	16	109791	815264	0.094767	2.32049	1
RASSF1	5	29	109791	815251	0.592943	1.28025	1
PTOV1	2	65	109794	815215	0.0214136	0.22846	1
PTPMT1	5	17	109791	815263	0.173285	2.184	1
FKTN	9	24	109787	815256	0.0125353	2.78467	1
RASSF5	6	39	109790	815241	0.649869	1.14236	1
RASSF4	2	32	109794	815248	0.424966	0.464078	1
RASSF7	1	10	109795	815270	1	0.742539	1
RASSF6	4	23	109792	815257	0.554175	1.29138	1
ITGB3	7	58	109789	815222	1	0.896148	1
MFAP1	3	30	109793	815250	0.791871	0.742534	1
VMO1	6	11	109790	815269	0.0107956	4.05085	1
NHP2	6	16	109790	815264	0.038819	2.78462	1
CSNK1A1L	7	13	109789	815267	0.00629396	3.998	1
RP4-608O15.3	5	14	109791	815266	0.0659318	2.652	1
DNAJC5	0	39	109796	815241	0.0118336	0	1
RSAD2	6	24	109790	815256	0.160304	1.85636	1
RSAD1	11	40	109785	815240	0.0471043	2.04212	1
CHD1	2	80	109794	815200	0.00530067	0.18562	1
NFS1	2	29	109794	815251	0.575387	0.512089	1
CHD3	2	180	109794	815100	5.85052e-08	0.0824879	0.0010404
CHD2	2	113	109794	815167	0.000126355	0.131407	1
CHD5	6	222	109790	815058	9.18647e-07	0.200643	0.0163363
CHD4	1	128	109795	815152	3.41866e-06	0.0579982	0.060794
CHD7	1	237	109795	815043	6.01244e-12	0.0313392	1.06919e-07
CHD6	1	181	109795	815099	5.67501e-09	0.0410447	0.000100919
CHD9	6	161	109790	815119	0.000279673	0.276684	1
CHD8	5	144	109791	815136	0.000509928	0.257793	1
SGCA	3	34	109793	815246	0.61722	0.655174	1
GID4	4	27	109792	815253	0.781433	1.10003	1
CAP1	0	28	109796	815252	0.0704028	0	1
CAP2	5	36	109791	815244	0.812539	1.03131	1
NPC2	2	20	109794	815260	1	0.742536	1
NPC1	15	111	109781	815169	1	1.00343	1
MRC2	10	131	109786	815149	0.0894404	0.566786	1
RBFOX2	0	6	109796	815274	1	0	1
TTC5	3	25	109793	815255	1	0.89103	1
TTC4	2	6	109794	815274	0.243948	2.47508	1
TTC6	30	117	109766	815163	0.0030058	1.9041	1
RAB3GAP2	6	70	109790	815210	0.374197	0.636444	1
IL4R	7	73	109789	815207	0.489691	0.712007	1
BHLHA15	1	27	109795	815253	0.245427	0.275009	1
RAB3GAP1	19	50	109777	815230	0.000484861	2.82197	1
ATP10D	17	69	109779	815211	0.0297093	1.82957	1
C3orf52	3	21	109793	815259	0.75869	1.06079	1
TTC9	2	20	109794	815260	1	0.742536	1
TTC8	2	42	109794	815238	0.163354	0.353579	1
CAPS	4	18	109792	815262	0.322627	1.6501	1
CTD-3214H19.16	0	5	109796	815275	1	0	1
DYNC1LI1	3	31	109793	815249	0.792117	0.718581	1
DYNC1LI2	2	38	109794	815242	0.225961	0.3908	1
STC1	2	16	109794	815264	1	0.928167	1
CHDH	10	60	109786	815220	0.46424	1.23759	1
EFHC1	9	33	109787	815247	0.0879428	2.02523	1
CAPG	7	22	109789	815258	0.074709	2.36275	1
TPRKB	4	6	109792	815274	0.0230647	4.95051	1
ELP5	2	23	109794	815257	0.761325	0.645682	1
CSNK2A2	1	16	109795	815264	0.71206	0.464083	1
PRDM16	0	203	109796	815077	1.10405e-11	0	1.96333e-07
MPG	10	24	109786	815256	0.00487762	3.09413	1
PLSCR4	0	20	109796	815260	0.159557	0	1
PLSCR5	3	21	109793	815259	0.75869	1.06079	1
PLSCR2	4	24	109792	815256	0.567915	1.23758	1
ABCG5	15	56	109781	815224	0.0253303	1.98914	1
PRDM10	7	113	109789	815167	0.0463941	0.459946	1
PLSCR1	2	14	109794	815266	1	1.06079	1
ABCG8	10	81	109786	815199	1	0.916699	1
SLC22A31	3	45	109793	815235	0.367369	0.495014	1
MPL	10	43	109786	815237	0.132696	1.7269	1
AVP	2	11	109794	815269	0.661229	1.35008	1
MPI	5	33	109791	815247	0.800388	1.12504	1
BEGAIN	2	76	109794	815204	0.00746284	0.195391	1
HIST1H3A	13	58	109783	815222	0.0982238	1.66439	1
CPT1A	6	72	109790	815208	0.297217	0.618764	1
POLRMT	26	206	109770	815074	0.839238	0.937167	1
HIST1H3F	3	20	109793	815260	0.749009	1.11378	1
MPZ	4	15	109792	815265	0.272199	1.9802	1
SGSM2	4	123	109792	815157	0.000850593	0.241449	1
MCPH1	17	72	109779	815208	0.0469756	1.75333	1
KDM1A	8	61	109788	815219	1	0.973821	1
GRPEL2	6	11	109790	815269	0.0107956	4.05085	1
SLC36A4	7	28	109789	815252	0.18255	1.85637	1
SGSM1	6	116	109790	815164	0.0162262	0.384039	1
SLC36A2	12	50	109784	815230	0.0761381	1.78218	1
KRIT1	4	30	109792	815250	1	0.990054	1
LRRC27	10	59	109786	815221	0.457869	1.25857	1
NRDC	5	68	109791	815212	0.273968	0.545966	1
GADL1	16	41	109780	815239	0.000736327	2.898	1
HIST1H3H	1	24	109795	815256	0.353376	0.309386	1
SRGAP2B	2	8	109794	815272	0.336629	1.85633	1
KRTAP5-11	2	14	109794	815266	1	1.06079	1
QRSL1	8	28	109788	815252	0.067336	2.12163	1
FCER1G	1	5	109795	815275	0.531429	1.48508	1
AKR1B10	12	15	109784	815265	2.40637e-05	5.94085	0.427924
FCER1A	6	12	109790	815268	0.0145934	3.71284	1
BTG2	1	17	109795	815263	0.714515	0.436783	1
SOSTDC1	3	9	109793	815271	0.162796	2.47509	1
FAHD1	2	20	109794	815260	1	0.742536	1
RP11-192H23.4	5	9	109791	815271	0.0187096	4.12579	1
SLA2	10	21	109786	815259	0.00230143	3.53637	1
C4orf36	4	5	109792	815275	0.0152541	5.94049	1
HESX1	3	11	109793	815269	0.22648	2.02517	1
C4orf32	0	9	109796	815271	0.611234	0	1
C4orf33	2	11	109794	815269	0.661229	1.35008	1
SRD5A3	2	18	109794	815262	1	0.825066	1
SRD5A2	4	18	109792	815262	0.322627	1.6501	1
SRD5A1	2	25	109794	815255	0.764243	0.594026	1
ARMT1	13	32	109783	815248	0.00168813	3.01682	1
HELLS	2	49	109794	815231	0.0838863	0.303065	1
METAP2	3	23	109793	815257	1	0.968529	1
FAM49A	1	29	109795	815251	0.251562	0.256042	1
FAM49B	0	23	109796	815257	0.102109	0	1
PDILT	5	50	109791	815230	0.677554	0.742529	1
ZFP36L1	1	18	109795	815262	0.718799	0.412517	1
ZFP36L2	3	95	109793	815185	0.00425847	0.234466	1
GGA1	1	67	109795	815213	0.00396509	0.110819	1
C10orf99	1	1	109795	815279	0.22329	7.4259	1
GGA3	12	67	109784	815213	0.381622	1.32996	1
GGA2	12	60	109784	815220	0.202156	1.48513	1
C15orf48	2	2	109794	815278	0.0717412	7.42596	1
C10orf90	9	52	109787	815228	0.431623	1.28519	1
C15orf40	4	12	109792	815268	0.11268	2.4751	1
C10orf95	7	21	109789	815259	0.0413225	2.47515	1
SERPINA1	0	6	109796	815274	1	0	1
FHOD3	8	134	109788	815146	0.018848	0.443267	1
ADH7	4	31	109792	815249	1	0.958113	1
ADH6	0	32	109796	815248	0.0277088	0	1
ADH5	6	19	109790	815261	0.110345	2.34481	1
ADH4	6	16	109790	815264	0.038819	2.78462	1
PKD2	5	69	109791	815211	0.209232	0.538053	1
PKD1	13	967	109783	814313	1.62387e-36	0.099718	2.88774e-32
GJC2	9	49	109787	815231	0.413081	1.36388	1
C4orf3	2	18	109794	815262	1	0.825066	1
GJC1	1	29	109795	815251	0.251562	0.256042	1
ZNF138	9	12	109787	815268	0.000357685	5.56943	1
PRKACG	8	20	109788	815260	0.0136576	2.97031	1
DEK	8	34	109788	815246	0.15128	1.7472	1
PRKACA	0	33	109796	815247	0.0279962	0	1
PRKACB	1	17	109795	815263	0.714515	0.436783	1
PSMB7	0	17	109796	815263	0.250916	0	1
ZNF131	3	42	109793	815238	0.36112	0.530374	1
PSMB5	0	22	109796	815258	0.100882	0	1
PSMB4	1	26	109795	815254	0.363675	0.285586	1
ZNF134	10	28	109786	815252	0.0113099	2.65208	1
PSMB2	0	7	109796	815273	1	0	1
PSMB1	1	19	109795	815261	0.502135	0.390805	1
PYCARD	4	18	109792	815262	0.322627	1.6501	1
LMBR1L	7	36	109789	815244	0.345454	1.44385	1
TMA7	0	8	109796	815272	0.607891	0	1
HDHD3	4	18	109792	815262	0.322627	1.6501	1
MAF1	2	43	109794	815237	0.164277	0.345356	1
DPPA5	3	10	109793	815270	0.19399	2.22765	1
AL049872.1	0	1	109796	815279	1	0	1
ZNF516	2	172	109794	815108	2.02653e-07	0.0863254	0.00360378
TDGF1	2	12	109794	815268	0.678471	1.23757	1
R3HDM4	9	31	109787	815249	0.0481077	2.15586	1
RP11-9J18.1	0	2	109796	815278	1	0	1
RMI1	13	30	109783	815250	0.00106188	3.21784	1
RMI2	4	16	109792	815264	0.286908	1.85635	1
MBL2	2	26	109794	815254	0.767292	0.571178	1
PTH2	2	10	109794	815270	0.645174	1.48508	1
CIART	3	17	109793	815263	0.724638	1.31037	1
TCEB3B	15	85	109781	815195	0.351279	1.31041	1
KCNK9	0	30	109796	815250	0.0433422	0	1
KCNK4	4	53	109792	815227	0.311042	0.560393	1
KCNK5	2	50	109794	815230	0.0842545	0.297004	1
KCNK6	4	36	109792	815244	1	0.825063	1
TRAT1	3	11	109793	815269	0.22648	2.02517	1
MLH3	27	63	109769	815217	3.4862e-06	3.18277	0.0619951
KCNK1	2	24	109794	815256	0.762216	0.618778	1
MLH1	5	52	109791	815228	0.68029	0.713969	1
KCNK3	0	31	109796	815249	0.0450462	0	1
TRIML2	7	33	109789	815247	0.321606	1.57511	1
C9orf142	3	15	109793	815265	0.465124	1.48509	1
TRIML1	7	40	109789	815240	0.497191	1.29946	1
NACC2	1	57	109795	815223	0.0126918	0.130263	1
VPS13D	31	302	109765	814978	0.174399	0.762145	1
ACOT12	5	35	109791	815245	0.808045	1.06079	1
ACOT13	1	4	109795	815276	0.468325	1.85632	1
VPS13A	43	176	109753	815104	0.00106989	1.81448	1
VPS13C	50	238	109746	815042	0.00603986	1.56021	1
VPS13B	66	236	109730	815044	1.07974e-06	2.07726	0.0192011
CRYZ	5	11	109791	815269	0.0333832	3.37505	1
UBAP2	17	90	109779	815190	0.229109	1.40263	1
NUP160	12	91	109784	815189	1	0.979172	1
CRYM	3	14	109793	815266	0.444804	1.59116	1
TMEM163	1	36	109795	815244	0.120983	0.206254	1
TMEM165	2	20	109794	815260	1	0.742536	1
TMEM169	4	26	109792	815254	0.775998	1.14236	1
TMEM168	10	44	109786	815236	0.138501	1.68765	1
EVI2B	4	12	109792	815268	0.11268	2.4751	1
FOXN1	2	68	109794	815212	0.0148999	0.21838	1
FOXN2	3	32	109793	815248	0.79315	0.696124	1
REPIN1	3	56	109793	815224	0.15431	0.397773	1
NICN1	2	21	109794	815259	1	0.707177	1
EIF3K	4	18	109792	815262	0.322627	1.6501	1
PMVK	3	15	109793	815265	0.465124	1.48509	1
PLBD2	5	48	109791	815232	0.830772	0.773475	1
VWDE	28	97	109768	815183	0.000785906	2.14371	1
SLC6A2	0	60	109796	815220	0.000962442	0	1
GNA14	11	31	109785	815249	0.0133505	2.63498	1
RP11-307N16.6	4	98	109792	815182	0.00870993	0.303053	1
GNA12	1	47	109795	815233	0.0401554	0.15798	1
KLHDC8B	4	17	109792	815263	0.303833	1.74718	1
KLHDC8A	9	31	109787	815249	0.0481077	2.15586	1
GNA11	0	56	109796	815224	0.00144011	0	1
SH2B2	19	57	109777	815223	0.00193279	2.47531	1
FSD1	0	62	109796	815218	0.000619262	0	1
SH2B3	15	63	109781	815217	0.0529034	1.76805	1
IFFO1	8	57	109788	815223	0.848257	1.04217	1
IFFO2	0	22	109796	815258	0.100882	0	1
CHTF18	17	217	109779	815063	0.0261099	0.58165	1
MFGE8	9	33	109787	815247	0.0879428	2.02523	1
DUSP26	4	11	109792	815269	0.0928561	2.70021	1
SH2B1	1	81	109795	815199	0.000852729	0.0916635	1
IL6ST	2	56	109794	815224	0.0423185	0.26518	1
SNAP91	2	56	109794	815224	0.0423185	0.26518	1
SBF2	7	120	109789	815160	0.0268861	0.433113	1
PCNT	52	327	109744	814953	0.265817	1.18088	1
NOL4	0	48	109796	815232	0.00549755	0	1
DBN1	3	62	109793	815218	0.0820158	0.359276	1
NOL7	2	22	109794	815258	1	0.675032	1
ACTG1	1	124	109795	815156	4.93348e-06	0.0598731	0.087732
OGDH	4	92	109792	815188	0.0167179	0.322819	1
NOL6	8	86	109788	815194	0.423413	0.690714	1
ADD1	3	65	109793	815215	0.0594889	0.342693	1
CDC73	1	25	109795	815255	0.357381	0.29701	1
C11orf31	4	16	109792	815264	0.286908	1.85635	1
C19orf12	5	24	109791	815256	0.382275	1.54698	1
SEMG1	15	39	109781	815241	0.00119855	2.85618	1
SEMG2	6	43	109790	815237	0.82699	1.03611	1
LMBRD2	11	28	109785	815252	0.00458926	2.91732	1
LMBRD1	5	28	109791	815252	0.585814	1.32598	1
OLIG1	1	33	109795	815247	0.176979	0.225005	1
DAZL	1	22	109795	815258	0.512396	0.337513	1
SRFBP1	11	36	109785	815244	0.022268	2.26906	1
TAS2R16	3	22	109793	815258	1	1.01256	1
BCAT2	4	24	109792	815256	0.567915	1.23758	1
BCAT1	10	26	109786	815254	0.00758003	2.85609	1
NEUROG3	3	12	109793	815268	0.410177	1.85634	1
AAED1	6	12	109790	815268	0.0145934	3.71284	1
MACROD2	0	34	109796	815246	0.0289178	0	1
MACROD1	5	29	109791	815251	0.592943	1.28025	1
MYH7B	46	240	109750	815040	0.0348181	1.42337	1
GBA2	19	56	109777	815224	0.00106569	2.51942	1
SNU13	0	18	109796	815262	0.156518	0	1
UBE2Q2	6	26	109790	815254	0.265575	1.71359	1
AKAP5	2	21	109794	815259	1	0.707177	1
AKAP6	10	144	109786	815136	0.0447969	0.51561	1
AKAP7	7	15	109789	815265	0.0111926	3.46569	1
DBNL	3	39	109793	815241	0.475287	0.571174	1
AKAP1	8	86	109788	815194	0.423413	0.690714	1
AKAP2	8	81	109788	815199	0.511652	0.733355	1
SEP15	6	10	109790	815270	0.00775377	4.4557	1
KLK8	2	21	109794	815259	1	0.707177	1
NPEPPS	2	53	109794	815227	0.0597343	0.280191	1
EIF2D	7	39	109789	815241	0.490513	1.33278	1
AKAP8	4	74	109792	815206	0.0775301	0.401352	1
AKAP9	51	189	109745	815091	3.4711e-05	2.00419	0.617266
EIF2A	9	31	109787	815249	0.0481077	2.15586	1
CYP26A1	4	43	109792	815237	0.651899	0.690725	1
CCDC117	0	22	109796	815258	0.100882	0	1
PSTK	5	22	109791	815258	0.243689	1.68762	1
TUBE1	8	32	109788	815248	0.135634	1.85638	1
PHPT1	4	6	109792	815274	0.0230647	4.95051	1
KLHL36	7	117	109789	815163	0.0356612	0.44422	1
INTS2	5	61	109791	815219	0.344277	0.608623	1
CCDC115	8	17	109788	815263	0.00656764	3.49479	1
AC002985.3	2	1	109794	815279	0.0389168	14.851	1
NFU1	1	17	109795	815263	0.714515	0.436783	1
ODF2	4	71	109792	815209	0.104767	0.418312	1
RRP1B	6	58	109790	815222	0.698942	0.768136	1
NOVA2	0	40	109796	815240	0.0120464	0	1
NOVA1	1	34	109795	815246	0.117666	0.218387	1
ODF1	6	24	109790	815256	0.160304	1.85636	1
HSP90B1	5	51	109791	815229	0.678571	0.727969	1
CCDC113	7	27	109789	815253	0.114586	1.92526	1
TMEM99	8	19	109788	815261	0.0108634	3.12667	1
KRR1	5	16	109791	815264	0.094767	2.32049	1
TMEM132E	6	95	109790	815185	0.0650977	0.468945	1
KLHL32	3	40	109793	815240	0.477203	0.556894	1
TMEM132A	9	104	109787	815176	0.243915	0.642555	1
PEG10	1	36	109795	815244	0.120983	0.206254	1
TMEM132B	5	82	109791	815198	0.0949365	0.452744	1
OVGP1	6	45	109790	815235	1	0.990054	1
CETN3	5	8	109791	815272	0.0133083	4.64124	1
NAIF1	1	36	109795	815244	0.120983	0.206254	1
CCL28	2	7	109794	815273	0.290487	2.12157	1
PCLO	5	328	109791	814952	1.73756e-12	0.113152	3.0899e-08
DIO1	3	13	109793	815267	0.426309	1.71357	1
H3F3A	0	11	109796	815269	0.63094	0	1
VSX2	5	41	109791	815239	1	0.905521	1
CCL21	6	8	109790	815272	0.00358592	5.56931	1
CCL20	0	4	109796	815276	1	0	1
CCL23	0	3	109796	815277	1	0	1
CCL22	2	16	109794	815264	1	0.928167	1
CCL25	1	14	109795	815266	1	0.530383	1
CCL24	1	6	109795	815274	0.587044	1.23757	1
CCL27	2	6	109794	815274	0.243948	2.47508	1
CCL26	1	7	109795	815273	1	1.06079	1
ALPK1	22	84	109774	815196	0.00959305	1.94502	1
ALPK3	26	152	109770	815128	0.24711	1.2702	1
ALPK2	27	153	109769	815127	0.203717	1.31044	1
POC1B-GALNT4	12	41	109784	815239	0.0296536	2.17342	1
C8orf48	7	26	109789	815254	0.104295	1.99926	1
UCK1	3	27	109793	815253	1	0.825065	1
C8orf46	1	18	109795	815262	0.718799	0.412517	1
UCK2	1	20	109795	815260	0.502998	0.371265	1
PHRF1	0	2	109796	815278	1	0	1
PRPF39	2	35	109794	815245	0.310813	0.424298	1
TP53I3	6	21	109790	815259	0.125677	2.12161	1
CUX1	2	156	109794	815124	8.75592e-07	0.0951811	0.0155707
CUX2	4	161	109792	815119	1.81942e-05	0.184453	0.323548
MAP3K9	7	88	109789	815192	0.205149	0.590632	1
ZNF823	15	26	109781	815254	3.94362e-05	4.28468	0.701294
AGAP14	15	81	109781	815199	0.267085	1.37512	1
GFY	15	43	109781	815237	0.00326131	2.59047	1
BRF2	15	28	109781	815252	7.46999e-05	3.97784	1
CYSTM1	2	5	109794	815275	0.197743	2.9702	1
BRF1	8	102	109788	815178	0.182122	0.582355	1
FSIP2	91	344	109705	814936	9.99355e-08	1.96515	0.00177715
FSIP1	10	24	109786	815256	0.00487762	3.09413	1
DNAJC8	4	17	109792	815263	0.303833	1.74718	1
CSNK1A1	0	17	109796	815263	0.250916	0	1
MB	1	16	109795	815264	0.71206	0.464083	1
CAMSAP2	0	67	109796	815213	0.00042262	0	1
GLYATL3	7	19	109789	815261	0.0283026	2.73578	1
DNAJC6	5	49	109791	815231	0.67727	0.757684	1
CAMSAP1	8	177	109788	815103	0.000581621	0.335563	1
DNAJC1	13	39	109783	815241	0.0080497	2.47523	1
DNAJC2	1	23	109795	815257	0.35187	0.322838	1
DNAJC3	3	30	109793	815250	0.791871	0.742534	1
CYP4F12	7	51	109789	815229	1	1.01918	1
ZNF701	17	35	109779	815245	6.50887e-05	3.60709	1
RP11-360D2.1	2	10	109794	815270	0.645174	1.48508	1
SORT1	2	52	109794	815228	0.0873648	0.28558	1
SLC18A2	8	42	109788	815238	0.377871	1.41439	1
SLC18A1	4	51	109792	815229	0.40323	0.58237	1
GOSR1	3	14	109793	815266	0.444804	1.59116	1
PRPF31	0	11	109796	815269	0.63094	0	1
RRP15	2	13	109794	815267	0.696393	1.14236	1
CCDC97	9	34	109787	815246	0.0921307	1.9657	1
RALBP1	4	39	109792	815241	0.813613	0.761573	1
NRN1	2	17	109794	815263	1	0.873554	1
DEAF1	8	69	109788	815211	0.859979	0.860882	1
RAP1B	0	6	109796	815274	1	0	1
RAP1A	0	4	109796	815276	1	0	1
MAP3K7	1	34	109795	815246	0.117666	0.218387	1
ZNF831	20	154	109776	815126	1	0.96433	1
MTNR1B	5	43	109791	815237	1	0.863389	1
ZNF835	16	49	109780	815231	0.00355096	2.4248	1
IER3IP1	0	5	109796	815275	1	0	1
ZNF837	16	73	109780	815207	0.0980398	1.62757	1
ZNF836	4	50	109792	815230	0.402125	0.594018	1
ZNF839	17	87	109779	815193	0.170345	1.451	1
MAP3K5	2	86	109794	815194	0.00248811	0.172669	1
CUEDC1	8	39	109788	815241	0.259519	1.52319	1
LRIF1	11	48	109785	815232	0.108343	1.70172	1
MTNR1A	4	52	109792	815228	0.405458	0.57117	1
RP4-734P14.4	0	3	109796	815277	1	0	1
PHAX	7	24	109789	815256	0.0871036	2.16582	1
PET117	1	4	109795	815276	0.468325	1.85632	1
PRR29	1	21	109795	815259	0.506512	0.353585	1
ATOH7	6	16	109790	815264	0.038819	2.78462	1
ACAT1	10	17	109786	815263	0.000683943	4.3685	1
ACAT2	3	9	109793	815271	0.162796	2.47509	1
ATOH1	1	30	109795	815250	0.170211	0.247507	1
RNF152	2	31	109794	815249	0.423245	0.47905	1
CD200R1	5	25	109791	815255	0.394161	1.4851	1
LIMD1	3	60	109793	815220	0.114717	0.371253	1
RNF151	3	33	109793	815247	0.794914	0.675029	1
NUGGC	5	61	109791	815219	0.344277	0.608623	1
ATOH8	2	33	109794	815247	0.428446	0.450015	1
IVD	7	28	109789	815252	0.18255	1.85637	1
CSTB	5	6	109791	815274	0.00585579	6.18805	1
MARVELD3	8	40	109788	815240	0.269197	1.48511	1
CTF1	9	23	109787	815257	0.0101656	2.90575	1
TBPL2	5	30	109791	815250	0.60116	1.23758	1
PEX3	5	17	109791	815263	0.173285	2.184	1
SUGCT	10	29	109786	815251	0.0208718	2.56072	1
ZNF578	18	35	109778	815245	2.23587e-05	3.81924	0.397605
LDLR	10	95	109786	815185	0.547092	0.78161	1
ZNF579	3	63	109793	815217	0.0831963	0.353573	1
SBSPON	10	24	109786	815256	0.00487762	3.09413	1
ZPBP	5	29	109791	815251	0.592943	1.28025	1
OR8S1	6	28	109790	815252	0.286317	1.59118	1
IL2RA	2	24	109794	815256	0.762216	0.618778	1
ZFYVE21	1	22	109795	815258	0.512396	0.337513	1
ZFYVE27	5	40	109791	815240	1	0.928165	1
TPCN1	5	80	109791	815200	0.0938569	0.464063	1
TPCN2	6	78	109790	815202	0.235792	0.571162	1
RAB33B	1	9	109795	815271	1	0.825068	1
SLC17A4	7	34	109789	815246	0.32824	1.52879	1
SLC17A5	12	25	109784	815255	0.000820139	3.56464	1
TAS2R4	7	16	109789	815264	0.0144715	3.24864	1
ZFYVE28	3	151	109793	815129	1.42965e-05	0.147501	0.254234
SLC17A1	8	29	109788	815251	0.074505	2.04849	1
SPAG16	8	36	109788	815244	0.237225	1.65013	1
TAS2R1	2	24	109794	815256	0.762216	0.618778	1
MDH1B	8	41	109788	815239	0.372033	1.44889	1
C16orf58	7	40	109789	815240	0.497191	1.29946	1
RBMXL2	4	41	109792	815239	0.816255	0.72442	1
TRPV3	8	89	109788	815191	0.345271	0.667429	1
TMEFF1	1	27	109795	815253	0.245427	0.275009	1
CDK5RAP2	21	112	109775	815168	0.178089	1.39233	1
CMTR2	17	35	109779	815245	6.50887e-05	3.60709	1
CMTR1	2	49	109794	815231	0.0838863	0.303065	1
TRPV2	18	59	109778	815221	0.00413133	2.2656	1
C16orf54	5	18	109791	815262	0.183644	2.06268	1
SYCE1L	4	11	109792	815269	0.0928561	2.70021	1
NUDT16L1	4	38	109792	815242	0.813103	0.781622	1
KIAA0319L	11	59	109785	815221	0.351952	1.38443	1
MYF5	3	21	109793	815259	0.75869	1.06079	1
AP5B1	10	102	109786	815178	0.383571	0.727957	1
SMCO2	7	20	109789	815260	0.0344063	2.59899	1
ERC1	5	61	109791	815219	0.344277	0.608623	1
ERC2	7	71	109789	815209	0.597699	0.732066	1
CHMP4C	3	10	109793	815270	0.19399	2.22765	1
BAX	2	22	109794	815258	1	0.675032	1
BAD	3	18	109793	815262	0.731775	1.23757	1
IARS	21	73	109775	815207	0.00365544	2.1363	1
BHMT2	4	20	109792	815260	0.52037	1.48509	1
PRKCDBP	3	30	109793	815250	0.791871	0.742534	1
ASXL1	33	114	109763	815166	0.000286395	2.14981	1
COBLL1	12	83	109784	815197	0.752024	1.07358	1
SLC37A2	4	53	109792	815227	0.311042	0.560393	1
SLC37A3	12	45	109784	815235	0.0398412	1.98027	1
CDK18	12	48	109784	815232	0.0684718	1.85641	1
CDK19	0	28	109796	815252	0.0704028	0	1
GFI1B	2	37	109794	815243	0.316425	0.401362	1
PMPCB	13	21	109783	815259	7.54377e-05	4.59731	1
PMPCA	7	64	109789	815216	0.715715	0.812161	1
TOB2	1	27	109795	815253	0.245427	0.275009	1
CDK12	2	90	109794	815190	0.00175537	0.164994	1
CDK13	2	136	109794	815144	8.77656e-06	0.109181	0.156074
CDK10	6	49	109790	815231	1	0.909217	1
SMCO4	2	5	109794	815275	0.197743	2.9702	1
CDK17	4	21	109792	815259	0.530162	1.41437	1
FAM126A	9	32	109787	815248	0.0536559	2.0885	1
CDK15	9	27	109787	815253	0.032682	2.47517	1
TSSK6	0	26	109796	815254	0.0657432	0	1
ST5	4	70	109792	815210	0.103495	0.424288	1
ST7	4	25	109792	815255	0.771248	1.18807	1
RBL2	5	51	109791	815229	0.678571	0.727969	1
ATP6V1B1	9	44	109787	815236	0.283177	1.51887	1
ATP6V1B2	0	37	109796	815243	0.0186302	0	1
BIN2	3	44	109793	815236	0.36395	0.506265	1
NOS1AP	3	40	109793	815240	0.477203	0.556894	1
PIP5KL1	5	40	109791	815240	1	0.928165	1
RP11-574K11.31	0	0	109796	815280	1	0	1
ZNF304	8	37	109788	815243	0.243457	1.60553	1
BFSP2	8	38	109788	815242	0.250913	1.56328	1
ZNF302	14	37	109782	815243	0.00195069	2.80984	1
ZNF300	14	34	109782	815246	0.00102552	3.0578	1
FAM216B	1	9	109795	815271	1	0.825068	1
FAM216A	6	15	109790	815265	0.0312846	2.97028	1
KCNAB3	9	33	109787	815247	0.0879428	2.02523	1
P2RY2	5	38	109791	815242	1	0.977025	1
SEC61G	0	4	109796	815276	1	0	1
MMP27	6	33	109790	815247	0.457451	1.35009	1
EVX2	6	49	109790	815231	1	0.909217	1
SEC61B	2	6	109794	815274	0.243948	2.47508	1
MMP20	10	42	109786	815238	0.127777	1.76802	1
DCAF11	10	32	109786	815248	0.0276703	2.32055	1
HOXB13	5	20	109791	815260	0.210339	1.85635	1
POSTN	13	57	109783	815223	0.0940306	1.69359	1
IGLL5	4	32	109792	815248	1	0.928166	1
TFG	1	31	109795	815249	0.170725	0.239522	1
ABCG4	2	63	109794	815217	0.0210467	0.235713	1
FBXO17	5	25	109791	815255	0.394161	1.4851	1
CTSZ	5	25	109791	815255	0.394161	1.4851	1
PIH1D1	5	23	109791	815257	0.372044	1.61424	1
RND1	1	17	109795	815263	0.714515	0.436783	1
RND2	6	8	109790	815272	0.00358592	5.56931	1
RND3	0	16	109796	815264	0.245134	0	1
NCL	0	67	109796	815213	0.00042262	0	1
CTNNBIP1	0	10	109796	815270	0.619307	0	1
PPP3CA	2	16	109794	815264	1	0.928167	1
PPP3CB	1	16	109795	815264	0.71206	0.464083	1
PPP3CC	2	34	109794	815246	0.310569	0.436778	1
DCAF10	2	57	109794	815223	0.0424557	0.260527	1
TCAIM	6	24	109790	815256	0.160304	1.85636	1
SESTD1	3	49	109793	815231	0.27861	0.454602	1
KIAA1549	8	216	109788	815064	1.81152e-05	0.274962	0.322142
LRRC41	1	63	109795	815217	0.00573343	0.117856	1
LRRC40	11	30	109785	815250	0.00692242	2.72282	1
LRRC43	17	66	109779	815214	0.0251953	1.91263	1
LRRC42	13	27	109783	815253	0.00049189	3.57564	1
LRRC45	9	68	109787	815212	1	0.982773	1
MMP23B	4	11	109792	815269	0.0928561	2.70021	1
LRRC47	6	75	109790	815205	0.299904	0.594011	1
LRRC46	5	25	109791	815255	0.394161	1.4851	1
LRRC49	8	36	109788	815244	0.237225	1.65013	1
CNTROB	13	70	109783	815210	0.305614	1.37904	1
FGFR4	16	86	109780	815194	0.221579	1.38152	1
B3GNT4	18	45	109778	815235	0.000277899	2.97049	1
B3GNT5	3	21	109793	815259	0.75869	1.06079	1
B3GNT6	9	41	109787	815239	0.186609	1.63001	1
B3GNT7	5	45	109791	815235	0.82888	0.825061	1
FNDC8	7	28	109789	815252	0.18255	1.85637	1
FNDC9	5	23	109791	815257	0.372044	1.61424	1
B3GNT2	4	26	109792	815254	0.775998	1.14236	1
B3GNT3	8	32	109788	815248	0.135634	1.85638	1
FNDC4	1	21	109795	815259	0.506512	0.353585	1
FNDC5	0	12	109796	815268	0.382354	0	1
FNDC7	17	53	109779	815227	0.00439686	2.38194	1
B3GNT8	9	42	109787	815238	0.194294	1.5912	1
FNDC1	15	175	109781	815105	0.0928601	0.636414	1
ADRA2B	6	38	109790	815242	0.642663	1.17244	1
FGFR3	4	143	109792	815137	0.000106589	0.207675	1
TEX26	5	18	109791	815262	0.183644	2.06268	1
PWWP2B	6	117	109790	815163	0.0118375	0.380756	1
TEX22	5	20	109791	815260	0.210339	1.85635	1
PWWP2A	2	61	109794	815219	0.0301499	0.243442	1
CTSW	10	29	109786	815251	0.0208718	2.56072	1
RITA1	5	26	109791	815254	0.407498	1.42798	1
GINM1	5	16	109791	815264	0.094767	2.32049	1
PCYT1A	5	32	109791	815248	0.797347	1.16022	1
TBCCD1	4	41	109792	815239	0.816255	0.72442	1
RP5-994D16.11	2	12	109794	815268	0.678471	1.23757	1
DAAM1	4	61	109792	815219	0.181316	0.486894	1
DAAM2	6	82	109790	815198	0.185139	0.543298	1
RP5-994D16.12	0	4	109796	815276	1	0	1
XAF1	5	18	109791	815262	0.183644	2.06268	1
PWP2	0	0	109796	815280	1	0	1
CCDC152	1	14	109795	815266	1	0.530383	1
CCDC153	8	18	109788	815262	0.00851495	3.30018	1
CCDC150	13	54	109783	815226	0.0849965	1.78769	1
CCDC151	5	41	109791	815239	1	0.905521	1
GUK1	4	20	109792	815260	0.52037	1.48509	1
CCDC157	16	57	109780	815223	0.0164623	2.0845	1
CCDC154	11	97	109785	815183	0.765264	0.84207	1
YIF1A	6	31	109790	815249	0.440189	1.43719	1
CCDC158	23	63	109773	815217	0.000148473	2.71122	1
CCDC159	5	33	109791	815247	0.800388	1.12504	1
WRAP73	4	55	109792	815225	0.312362	0.540014	1
TUFT1	7	22	109789	815258	0.074709	2.36275	1
TMCO5A	8	19	109788	815261	0.0108634	3.12667	1
SYT8	5	62	109791	815218	0.344791	0.598806	1
MUTYH	9	40	109787	815240	0.179932	1.67076	1
LRRC4C	1	44	109795	815236	0.0382351	0.168752	1
LRRC4B	0	76	109796	815204	0.000117107	0	1
MTCH2	1	21	109795	815259	0.506512	0.353585	1
FN1	13	173	109783	815107	0.0405127	0.557927	1
ATP5J	2	5	109794	815275	0.197743	2.9702	1
SYT1	0	27	109796	815253	0.067403	0	1
SYT2	1	38	109795	815242	0.0812942	0.195398	1
OR6T1	8	26	109788	815254	0.0556874	2.28473	1
SYT4	1	32	109795	815248	0.173009	0.232037	1
SYT5	5	30	109791	815250	0.60116	1.23758	1
SYT6	3	39	109793	815241	0.475287	0.571174	1
SYT7	6	66	109790	815214	0.46549	0.67502	1
SYK	1	47	109795	815233	0.0401554	0.15798	1
RHO	3	42	109793	815238	0.36112	0.530374	1
ATP5O	3	20	109793	815260	0.749009	1.11378	1
RHD	1	3	109795	815277	0.396723	2.47506	1
MEP1B	19	20	109777	815260	1.64494e-08	7.05446	0.000292519
TASP1	5	14	109791	815266	0.0659318	2.652	1
SNF8	4	28	109792	815252	0.787448	1.06079	1
PCED1A	6	34	109790	815246	0.467827	1.31038	1
PCED1B	6	39	109790	815241	0.649869	1.14236	1
FUBP3	1	48	109795	815232	0.0261436	0.154688	1
NAT14	7	25	109789	815255	0.0951194	2.0792	1
FUBP1	0	30	109796	815250	0.0433422	0	1
NCSTN	1	44	109795	815236	0.0382351	0.168752	1
SLC9A3R2	8	33	109788	815247	0.142904	1.80015	1
SCHIP1	4	30	109792	815250	1	0.990054	1
SPZ1	3	19	109793	815261	0.739971	1.17243	1
CEP104	21	61	109775	815219	0.000503158	2.55669	1
FAM189A2	7	34	109789	815246	0.32824	1.52879	1
MARCO	10	55	109786	815225	0.340788	1.3501	1
SAP30	1	13	109795	815267	1	0.571182	1
NBL1	0	2	109796	815278	1	0	1
TCP11L2	12	32	109784	815248	0.00423609	2.78472	1
ATP8B4	17	90	109779	815190	0.229109	1.40263	1
NES	27	99	109769	815181	0.00214822	2.0254	1
CCZ1B	9	25	109787	815255	0.015292	2.67328	1
PALMD	8	32	109788	815248	0.135634	1.85638	1
AL365273.1	0	0	109796	815280	1	0	1
PRSS27	1	37	109795	815243	0.0811247	0.20068	1
ANGPT2	2	24	109794	815256	0.762216	0.618778	1
ANGPT1	2	35	109794	815245	0.310813	0.424298	1
DRC3	6	49	109790	815231	1	0.909217	1
DRC1	8	55	109788	815225	0.84474	1.08009	1
PRSS22	5	41	109791	815239	1	0.905521	1
N4BP2L1	4	7	109792	815273	0.0328983	4.24357	1
PALM2	2	40	109794	815240	0.228723	0.371259	1
OXT	2	11	109794	815269	0.661229	1.35008	1
DUPD1	5	13	109791	815267	0.0536413	2.85601	1
C1orf53	1	17	109795	815263	0.714515	0.436783	1
C1orf52	1	17	109795	815263	0.714515	0.436783	1
C1orf50	3	7	109793	815273	0.105918	3.1823	1
C1orf56	8	20	109788	815260	0.0136576	2.97031	1
C1orf54	3	9	109793	815271	0.162796	2.47509	1
C11orf1	10	13	109786	815267	0.000145281	5.71227	1
CEP295NL	9	56	109787	815224	0.566417	1.19338	1
MARC1	3	31	109793	815249	0.792117	0.718581	1
MARC2	1	26	109795	815254	0.363675	0.285586	1
ICMT	0	26	109796	815254	0.0657432	0	1
PHF5A	0	11	109796	815269	0.63094	0	1
FDCSP	1	5	109795	815275	0.531429	1.48508	1
CABIN1	23	189	109773	815091	0.749841	0.903588	1
EME1	9	31	109787	815249	0.0481077	2.15586	1
FCF1	1	13	109795	815267	1	0.571182	1
ATP6V0A4	10	70	109786	815210	0.86222	1.0608	1
ATP6V0A1	4	58	109792	815222	0.238694	0.51208	1
ATP6V0A2	7	73	109789	815207	0.489691	0.712007	1
MRPS34	7	22	109789	815258	0.074709	2.36275	1
GUCA1A	3	15	109793	815265	0.465124	1.48509	1
GUCA1C	1	11	109795	815269	1	0.675035	1
GUCA1B	4	21	109792	815259	0.530162	1.41437	1
KRT75	6	51	109790	815229	1	0.873549	1
KRT74	8	50	109788	815230	0.682673	1.18808	1
KRT77	10	50	109786	815230	0.232817	1.48512	1
KRT76	7	58	109789	815222	1	0.896148	1
KRT71	9	50	109787	815230	0.418371	1.3366	1
KRT73	8	51	109788	815229	0.685682	1.16477	1
KRT72	4	42	109792	815238	0.651116	0.707171	1
TBC1D4	17	97	109779	815183	0.309993	1.3014	1
ATM	53	173	109743	815107	1.38944e-06	2.27558	0.0247085
KRT79	10	47	109786	815233	0.214193	1.57991	1
KRT78	10	48	109786	815232	0.219468	1.547	1
C17orf100	2	16	109794	815264	1	0.928167	1
MRPS30	8	31	109788	815249	0.129524	1.91641	1
SMPD4	10	116	109786	815164	0.213768	0.640089	1
ATR	28	148	109768	815132	0.102294	1.4049	1
HAAO	5	10	109791	815270	0.025374	3.71282	1
ACOXL	13	42	109783	815238	0.0117993	2.29847	1
SMPD2	7	30	109789	815250	0.198142	1.73264	1
BRIP1	24	61	109772	815219	5.77919e-05	2.92189	1
PDE11A	14	66	109782	815214	0.120111	1.57515	1
ITGBL1	6	40	109790	815240	0.818315	1.11379	1
ADAP2	4	22	109792	815258	0.541513	1.35008	1
ZNF571	14	30	109782	815250	0.00038669	3.46585	1
ATP5A1	2	40	109794	815240	0.228723	0.371259	1
HFE2	6	34	109790	815246	0.467827	1.31038	1
RP11-314N13.10	0	1	109796	815279	1	0	1
RP11-201K10.3	0	1	109796	815279	1	0	1
TTC28	10	226	109786	815054	7.28401e-05	0.328497	1
TTC29	13	39	109783	815241	0.0080497	2.47523	1
HYPK	4	18	109792	815262	0.322627	1.6501	1
TTC24	11	49	109785	815231	0.157326	1.66699	1
TTC25	6	22	109790	815258	0.135767	2.0252	1
TTC26	7	25	109789	815255	0.0951194	2.0792	1
TTC27	10	49	109786	815231	0.225691	1.51543	1
PATL2	5	45	109791	815235	0.82888	0.825061	1
TTC22	8	68	109788	815212	0.859692	0.873547	1
PATL1	2	56	109794	815224	0.0423185	0.26518	1
ETFA	6	10	109790	815270	0.00775377	4.4557	1
UBE3C	6	79	109790	815201	0.237469	0.563932	1
PODXL2	1	58	109795	815222	0.00829298	0.128016	1
U2SURP	1	50	109795	815230	0.0270833	0.148501	1
HRASLS2	1	12	109795	815268	1	0.618781	1
IL6R	2	41	109794	815239	0.23229	0.362203	1
ENO1	8	36	109788	815244	0.237225	1.65013	1
NPY2R	4	31	109792	815249	1	0.958113	1
ENO3	6	32	109790	815248	0.448195	1.39228	1
ENO4	8	41	109788	815239	0.372033	1.44889	1
CELF6	0	5	109796	815275	1	0	1
CARF	12	40	109784	815240	0.0281628	2.22775	1
NPAT	6	84	109790	815196	0.143141	0.530361	1
TAOK2	7	108	109789	815172	0.0595893	0.481244	1
SYCP1	1	58	109795	815222	0.00829298	0.128016	1
MCEMP1	1	15	109795	815265	0.71172	0.495023	1
CNOT6L	1	31	109795	815249	0.170725	0.239522	1
TPTE2	13	42	109783	815238	0.0117993	2.29847	1
FAXC	3	23	109793	815257	1	0.968529	1
SLC22A18	3	3	109793	815277	0.0253289	7.42601	1
LLGL1	9	138	109787	815142	0.0294579	0.484224	1
ACOX2	15	50	109781	815230	0.0108147	2.22779	1
ACOX3	10	77	109786	815203	1	0.964333	1
SLC22A14	15	55	109781	815225	0.0239448	2.02528	1
SLC22A15	12	42	109784	815238	0.0315609	2.12167	1
SLC22A12	3	67	109793	815213	0.0612174	0.332463	1
SLC22A13	8	56	109788	815224	0.846364	1.06079	1
SLC22A10	11	41	109785	815239	0.0505416	1.99233	1
SLC22A11	4	55	109792	815225	0.312362	0.540014	1
NUP107	12	48	109784	815232	0.0684718	1.85641	1
NSMCE1	3	20	109793	815260	0.749009	1.11378	1
NSMCE2	5	15	109791	815265	0.0796521	2.47512	1
OBSCN	132	1031	109664	814249	0.617815	0.950619	1
DAGLA	2	112	109794	815168	0.000124602	0.132581	1
PTK2	2	58	109794	815222	0.0430611	0.256035	1
PTK7	3	99	109793	815181	0.00306229	0.224991	1
PTK6	11	55	109785	815225	0.249627	1.48512	1
RABGAP1	4	62	109792	815218	0.181761	0.47904	1
AC004754.3	0	0	109796	815280	1	0	1
SRRD	11	26	109785	815254	0.00292754	3.14167	1
PRKAA2	4	33	109792	815247	1	0.900032	1
PRKAA1	4	33	109792	815247	1	0.900032	1
ITGB3BP	2	12	109794	815268	0.678471	1.23757	1
DAGLB	13	68	109783	815212	0.230336	1.41961	1
RCSD1	6	36	109790	815244	0.630501	1.23758	1
MCL1	0	23	109796	815257	0.102109	0	1
SORBS1	4	87	109792	815193	0.0226366	0.341374	1
POMP	0	8	109796	815272	0.607891	0	1
SORBS3	11	56	109785	815224	0.254649	1.4586	1
GAL3ST2	0	1	109796	815279	1	0	1
ODC1	2	25	109794	815255	0.764243	0.594026	1
PFDN4	0	12	109796	815268	0.382354	0	1
SCARA3	9	65	109787	815215	0.8581	1.02814	1
IL18RAP	7	32	109789	815248	0.219058	1.62434	1
SCARA5	8	50	109788	815230	0.682673	1.18808	1
ATG16L1	1	40	109795	815240	0.0847257	0.185628	1
ATG16L2	8	39	109788	815241	0.259519	1.52319	1
C4orf50	11	102	109785	815178	0.56229	0.800775	1
C4orf51	5	18	109791	815262	0.183644	2.06268	1
C3orf30	5	21	109791	815259	0.226279	1.76798	1
ARHGDIB	2	11	109794	815269	0.661229	1.35008	1
C3orf36	7	16	109789	815264	0.0144715	3.24864	1
NDEL1	2	23	109794	815257	0.761325	0.645682	1
MTHFS	5	9	109791	815271	0.0187096	4.12579	1
USH1C	11	71	109785	815209	0.609687	1.15042	1
NANS	2	24	109794	815256	0.762216	0.618778	1
C3orf38	6	15	109790	815265	0.0312846	2.97028	1
USH1G	8	32	109788	815248	0.135634	1.85638	1
IL17REL	7	42	109789	815238	0.513386	1.23758	1
MATN1	6	46	109790	815234	1	0.968528	1
MATN3	9	39	109787	815241	0.174313	1.71361	1
MATN2	11	88	109785	815192	1	0.928161	1
MATN4	4	44	109792	815236	0.653585	0.675026	1
UBAP1L	10	38	109786	815242	0.0699825	1.95422	1
OR11H12	8	52	109788	815228	0.689277	1.14236	1
TANC1	12	157	109784	815123	0.0565399	0.567501	1
AP2S1	1	12	109795	815268	1	0.618781	1
TANC2	2	141	109794	815139	6.24515e-06	0.105309	0.111057
C15orf62	3	13	109793	815267	0.426309	1.71357	1
GALNT9	8	85	109788	815195	0.422081	0.69884	1
C15orf61	3	16	109793	815264	0.486797	1.39227	1
EBF3	1	75	109795	815205	0.00119396	0.0989973	1
KBTBD12	12	27	109784	815253	0.00138048	3.30027	1
EBF1	1	42	109795	815238	0.0562151	0.176788	1
C15orf65	2	6	109794	815274	0.243948	2.47508	1
HBA1	0	1	109796	815279	1	0	1
UCP1	8	25	109788	815255	0.0512238	2.37622	1
LMNA	2	64	109794	815216	0.0210997	0.23203	1
UCP3	2	29	109794	815251	0.575387	0.512089	1
BDH2	1	18	109795	815262	0.718799	0.412517	1
ENDOV	5	27	109791	815253	0.422089	1.37509	1
FFAR4	4	33	109792	815247	1	0.900032	1
DDX23	2	43	109794	815237	0.164277	0.345356	1
DDX21	3	32	109793	815248	0.79315	0.696124	1
DDX20	18	58	109778	815222	0.00373014	2.30464	1
DDX27	14	57	109782	815223	0.0628232	1.82389	1
HAUS5	6	47	109790	815233	1	0.947917	1
DDX25	9	29	109787	815251	0.0390564	2.30453	1
ZNF155	14	35	109782	815245	0.00128051	2.97042	1
GULP1	1	12	109795	815268	1	0.618781	1
DDX28	10	56	109786	815224	0.443266	1.32599	1
BORCS8	1	8	109795	815272	1	0.928168	1
ZNF90	16	30	109780	815250	4.51843e-05	3.9602	0.803512
ZNF91	18	81	109778	815199	0.0609471	1.65019	1
ZNF92	7	27	109789	815253	0.114586	1.92526	1
ZNF93	15	44	109781	815236	0.00369372	2.53178	1
PTHLH	1	9	109795	815271	1	0.825068	1
ZNF98	15	38	109781	815242	0.000971052	2.93135	1
ZNF99	26	58	109770	815222	2.75434e-06	3.32899	0.0489804
ANGPT4	6	46	109790	815234	1	0.968528	1
SAC3D1	7	31	109789	815249	0.207981	1.67674	1
FLVCR1	8	45	109788	815235	0.401671	1.32009	1
AFF4	0	75	109796	815205	0.000116283	0	1
RAET1E	7	15	109789	815265	0.0111926	3.46569	1
UBE2J1	4	28	109792	815252	0.787448	1.06079	1
UBE2J2	0	34	109796	815246	0.0289178	0	1
FKBP11	4	9	109792	815271	0.0588176	3.3001	1
TBX21	3	59	109793	815221	0.112744	0.377546	1
A3GALT2	9	36	109787	815244	0.103324	1.85639	1
FBXO10	8	70	109788	815210	0.860502	0.848578	1
FBXO11	0	57	109796	815223	0.00148153	0	1
FAM3D	0	23	109796	815257	0.102109	0	1
RAET1L	5	19	109791	815261	0.196062	1.95417	1
FBXO15	4	36	109792	815244	1	0.825063	1
ANKRD24	29	117	109767	815163	0.0047023	1.84069	1
AFF1	13	107	109783	815173	0.887497	0.902127	1
GGPS1	2	10	109794	815270	0.645174	1.48508	1
SFTA3	1	5	109795	815275	0.531429	1.48508	1
NRTN	1	25	109795	815255	0.357381	0.29701	1
EPS15L1	4	85	109792	815195	0.03135	0.349407	1
SIGLECL1	7	12	109789	815268	0.00455218	4.33202	1
NACA2	3	11	109793	815269	0.22648	2.02517	1
CNGB1	12	114	109784	815166	0.491713	0.781606	1
FAM153A	5	15	109791	815265	0.0796521	2.47512	1
FAM153B	4	23	109792	815257	0.554175	1.29138	1
RNPEPL1	8	63	109788	815217	1	0.9429	1
PARD6A	5	23	109791	815257	0.372044	1.61424	1
HNRNPUL2	1	89	109795	815191	0.000249295	0.0834233	1
PLA2G6	11	86	109785	815194	1	0.949753	1
PLA2G7	8	7	109788	815273	0.00011653	8.48643	1
PLA2G5	1	12	109795	815268	1	0.618781	1
PLA2G3	10	47	109786	815233	0.214193	1.57991	1
GDPGP1	5	25	109791	815255	0.394161	1.4851	1
SHC4	9	44	109787	815236	0.283177	1.51887	1
CCDC77	6	21	109790	815259	0.125677	2.12161	1
ATPAF1	5	26	109791	815254	0.407498	1.42798	1
SHC1	3	62	109793	815218	0.0820158	0.359276	1
ERBB4	3	73	109793	815207	0.0314648	0.305135	1
CCDC71	3	32	109793	815248	0.79315	0.696124	1
OR2G3	5	20	109791	815260	0.210339	1.85635	1
OR2G2	3	23	109793	815257	1	0.968529	1
FPR2	2	26	109794	815254	0.767292	0.571178	1
FPR3	3	27	109793	815253	1	0.825065	1
OR2G6	10	32	109786	815248	0.0276703	2.32055	1
CCDC78	9	46	109787	815234	0.29557	1.45283	1
CGRRF1	1	22	109795	815258	0.512396	0.337513	1
TMEM109	5	18	109791	815262	0.183644	2.06268	1
TMEM108	1	53	109795	815227	0.0182686	0.140094	1
HIST3H2BB	6	27	109790	815253	0.275178	1.65012	1
TMEM102	8	31	109788	815249	0.129524	1.91641	1
TMEM101	6	22	109790	815258	0.135767	2.0252	1
FOXH1	5	36	109791	815244	0.812539	1.03131	1
TMEM107	0	3	109796	815277	1	0	1
TMEM105	2	12	109794	815268	0.678471	1.23757	1
TMEM104	4	70	109792	815210	0.103495	0.424288	1
SMPDL3B	8	42	109788	815238	0.377871	1.41439	1
VIMP	7	15	109789	815265	0.0111926	3.46569	1
GHITM	7	22	109789	815258	0.074709	2.36275	1
SMPDL3A	6	26	109790	815254	0.265575	1.71359	1
TRANK1	40	222	109756	815058	0.103338	1.33803	1
CYP2B6	15	32	109781	815248	0.000233201	3.48132	1
CSHL1	6	41	109790	815239	0.820817	1.08668	1
SPEN	3	295	109793	814985	1.05571e-12	0.0754874	1.87736e-08
ZCWPW2	3	13	109793	815267	0.426309	1.71357	1
ZCWPW1	10	33	109786	815247	0.030906	2.25023	1
FKBP1B	1	8	109795	815272	1	0.928168	1
FKBP1A	3	4	109793	815276	0.0404586	5.56918	1
SPEG	15	330	109781	814950	1.67702e-06	0.337428	0.0298224
MANEAL	5	48	109791	815232	0.830772	0.773475	1
GLDN	11	43	109785	815237	0.0591065	1.89952	1
STAT6	4	59	109792	815221	0.239988	0.5034	1
ACP5	6	25	109790	815255	0.257655	1.78214	1
SSC4D	6	68	109790	815212	0.469475	0.655165	1
STOML2	2	27	109794	815253	0.571004	0.550023	1
MLEC	0	23	109796	815257	0.102109	0	1
STOML1	6	41	109790	815239	0.820817	1.08668	1
FBLIM1	10	45	109786	815235	0.145162	1.65014	1
TIMM8B	1	10	109795	815270	1	0.742539	1
CDC16	4	46	109792	815234	0.514607	0.645675	1
MET	4	89	109792	815191	0.0231342	0.333702	1
AHNAK	15	392	109781	814888	8.8674e-09	0.284038	0.000157689
TBATA	1	31	109795	815249	0.170725	0.239522	1
NT5E	6	17	109790	815263	0.0474123	2.62082	1
C3	8	136	109788	815144	0.0193046	0.436748	1
GRIK1	6	78	109790	815202	0.235792	0.571162	1
MAP10	20	69	109776	815211	0.00457049	2.1525	1
NUTM1	14	63	109782	815217	0.109138	1.65016	1
RHCG	5	35	109791	815245	0.808045	1.06079	1
LGALS9C	11	31	109785	815249	0.0133505	2.63498	1
LGALS9B	6	18	109790	815262	0.0570894	2.47513	1
UNC50	9	11	109787	815269	0.000228437	6.07573	1
NKAIN4	1	23	109795	815257	0.35187	0.322838	1
NKAIN3	1	13	109795	815267	1	0.571182	1
NKAIN2	1	14	109795	815266	1	0.530383	1
NKAIN1	1	19	109795	815261	0.502135	0.390805	1
MAP1A	18	184	109778	815096	0.230593	0.726354	1
MAP1B	0	185	109796	815095	1.36265e-10	0	2.42321e-06
TMEM200C	6	47	109790	815233	1	0.947917	1
PDCL2	4	12	109792	815268	0.11268	2.4751	1
PDCL3	3	17	109793	815263	0.724638	1.31037	1
GAS7	2	47	109794	815233	0.118619	0.315962	1
LBX2	5	15	109791	815265	0.0796521	2.47512	1
UNC5C	5	89	109791	815191	0.0538831	0.417131	1
VGF	0	48	109796	815232	0.00549755	0	1
UNC5A	0	71	109796	815209	0.000288715	0	1
UNC5D	3	80	109793	815200	0.0162299	0.278433	1
CCM2	1	40	109795	815240	0.0847257	0.185628	1
GJD4	10	52	109786	815228	0.322314	1.428	1
MAP1S	9	138	109787	815142	0.0294579	0.484224	1
FRMD8	9	59	109787	815221	0.70683	1.13268	1
ZNF430	6	17	109790	815263	0.0474123	2.62082	1
CCP110	12	48	109784	815232	0.0684718	1.85641	1
IMMP1L	5	4	109791	815276	0.00196054	9.28146	1
SPICE1	18	42	109778	815238	0.000140968	3.18259	1
CTC-487M23.8	0	0	109796	815280	1	0	1
FRMD1	8	63	109788	815217	1	0.9429	1
PKNOX2	2	36	109794	815244	0.312795	0.412512	1
FRMD3	5	39	109791	815241	1	0.95197	1
GNAQ	2	32	109794	815248	0.424966	0.464078	1
PDP1	2	36	109794	815244	0.312795	0.412512	1
MED13L	0	153	109796	815127	8.86791e-09	0	0.000157698
DSCR4	1	11	109795	815269	1	0.675035	1
PTCD2	6	20	109790	815260	0.117171	2.22769	1
PTCD3	11	57	109785	815223	0.260515	1.43301	1
DSCR3	4	33	109792	815247	1	0.900032	1
PTCD1	12	78	109784	815202	0.625264	1.14237	1
GNAL	1	37	109795	815243	0.0811247	0.20068	1
HLTF	14	46	109782	815234	0.0140489	2.26006	1
AGFG2	4	37	109792	815243	1	0.802756	1
AGFG1	0	31	109796	815249	0.0450462	0	1
DPF2	1	30	109795	815250	0.170211	0.247507	1
DPF3	3	31	109793	815249	0.792117	0.718581	1
DPF1	1	44	109795	815236	0.0382351	0.168752	1
PPP1R9B	1	85	109795	815195	0.000369639	0.0873495	1
CLPX	4	30	109792	815250	1	0.990054	1
CTIF	1	76	109795	815204	0.00119957	0.0976946	1
CRYGS	3	12	109793	815268	0.410177	1.85634	1
RPL18A	0	31	109796	815249	0.0450462	0	1
SIX1	5	23	109791	815257	0.372044	1.61424	1
KRT3	8	58	109788	815222	0.850401	1.0242	1
KRT2	6	65	109790	815215	0.46471	0.685406	1
KRT1	4	37	109792	815243	1	0.802756	1
FST	2	30	109794	815250	0.579915	0.495019	1
CRYGN	3	21	109793	815259	0.75869	1.06079	1
PHF24	3	29	109793	815251	1	0.768143	1
CLEC18A	3	20	109793	815260	0.749009	1.11378	1
CRYGA	4	16	109792	815264	0.286908	1.85635	1
CRYGB	6	13	109790	815267	0.0192278	3.42692	1
CRYGC	1	21	109795	815259	0.506512	0.353585	1
CRYGD	6	20	109790	815260	0.117171	2.22769	1
DACT3	1	63	109795	815217	0.00573343	0.117856	1
DACT2	9	97	109787	815183	0.366153	0.68893	1
BORCS7	1	10	109795	815270	1	0.742539	1
VPS45	9	26	109787	815254	0.0304777	2.57052	1
BORCS5	0	17	109796	815263	0.250916	0	1
RRNAD1	5	27	109791	815253	0.422089	1.37509	1
VPS41	14	52	109782	815228	0.0330454	1.99932	1
MOCS3	8	37	109788	815243	0.243457	1.60553	1
CTD-3214H19.4	0	3	109796	815277	1	0	1
BCAP29	7	24	109789	815256	0.0871036	2.16582	1
TMCC1	1	32	109795	815248	0.173009	0.232037	1
TMCC2	3	73	109793	815207	0.0314648	0.305135	1
ECT2L	22	69	109774	815211	0.00095274	2.36779	1
SDR42E1	5	32	109791	815248	0.797347	1.16022	1
PHF23	0	31	109796	815249	0.0450462	0	1
NMNAT2	1	28	109795	815252	0.247439	0.265187	1
NMNAT3	4	13	109792	815267	0.134184	2.28468	1
RP11-526A4.1	9	28	109787	815252	0.0355388	2.38684	1
SPRR2B	2	6	109794	815274	0.243948	2.47508	1
ALOX12B	7	59	109789	815221	1	0.880954	1
FOXG1	0	54	109796	815226	0.00228722	0	1
TAS2R38	6	19	109790	815261	0.110345	2.34481	1
TAS2R39	5	17	109791	815263	0.173285	2.184	1
HMGA2	0	4	109796	815276	1	0	1
PPCDC	1	15	109795	815265	0.71172	0.495023	1
EPB41L3	7	91	109789	815189	0.20859	0.571159	1
EPB41L2	10	62	109786	815218	0.583376	1.19766	1
EPB41L5	4	35	109792	815245	1	0.848583	1
ACSS3	7	44	109789	815236	0.663543	1.18132	1
CCDC25	1	8	109795	815272	1	0.928168	1
ACSS1	3	83	109793	815197	0.0115335	0.268368	1
KIDINS220	11	131	109785	815149	0.152467	0.62347	1
PLEKHM2	6	114	109790	815166	0.0158916	0.390778	1
PLEKHM3	6	42	109790	815238	0.823722	1.06079	1
VPS4A	0	47	109796	815233	0.00522858	0	1
VPS4B	3	19	109793	815261	0.739971	1.17243	1
GMEB2	0	73	109796	815207	0.000179135	0	1
GMEB1	1	26	109795	815254	0.363675	0.285586	1
FAM72C	0	3	109796	815277	1	0	1
FAM72B	1	2	109795	815278	0.315477	3.71272	1
FAM72A	0	4	109796	815276	1	0	1
KRTAP12-4	2	11	109794	815269	0.661229	1.35008	1
FRMD4A	5	104	109791	815176	0.0166506	0.356961	1
DFNA5	11	48	109785	815232	0.108343	1.70172	1
TAGAP	5	65	109791	815215	0.269469	0.571166	1
RRP36	7	20	109789	815260	0.0344063	2.59899	1
DCAF12	2	27	109794	815253	0.571004	0.550023	1
WNT2	3	25	109793	815255	1	0.89103	1
WNT1	4	23	109792	815257	0.554175	1.29138	1
SZRD1	0	11	109796	815269	0.63094	0	1
AGXT	6	25	109790	815255	0.257655	1.78214	1
LRRN2	1	65	109795	815215	0.00382987	0.114229	1
LRRN1	1	64	109795	815216	0.00592509	0.116014	1
WNT4	0	41	109796	815239	0.0125491	0	1
TREML2	6	25	109790	815255	0.257655	1.78214	1
PPP1R15B	9	29	109787	815251	0.0390564	2.30453	1
GPAA1	6	57	109790	815223	0.698374	0.781618	1
TREML4	3	16	109793	815264	0.486797	1.39227	1
CDHR1	7	67	109789	815213	0.717959	0.775781	1
CNTNAP5	4	105	109792	815175	0.00453222	0.282847	1
CDHR2	19	154	109777	815126	0.81432	0.916097	1
CNTNAP4	11	114	109785	815166	0.334413	0.716459	1
RECK	14	49	109782	815231	0.0177805	2.12169	1
CDHR3	12	80	109784	815200	0.74615	1.11379	1
TYRP1	10	31	109786	815249	0.0249287	2.39541	1
SPDYE5	10	47	109786	815233	0.214193	1.57991	1
GPRIN3	10	53	109786	815227	0.327587	1.40105	1
GPRIN1	11	75	109785	815205	0.739222	1.0891	1
SPDYE1	6	28	109790	815252	0.286317	1.59118	1
KIF23	0	59	109796	815221	0.000942918	0	1
SPDYE3	5	33	109791	815247	0.800388	1.12504	1
SPDYE2	1	5	109795	815275	0.531429	1.48508	1
INSR	3	146	109793	815134	1.95409e-05	0.152554	0.347496
ZNF729	16	102	109780	815178	0.56814	1.16478	1
RUNX1T1	3	58	109793	815222	0.111538	0.384056	1
HIST2H2BF	2	26	109794	815254	0.767292	0.571178	1
HIST2H2BE	1	20	109795	815260	0.502998	0.371265	1
RP11-446E24.4	0	0	109796	815280	1	0	1
ZNF813	11	38	109785	815242	0.0419126	2.14958	1
SPTBN5	93	371	109703	814909	4.12711e-07	1.86204	0.00733924
SPTBN4	9	252	109787	815028	2.07263e-06	0.265133	0.0368576
CTD-2568A17.1	0	0	109796	815280	1	0	1
SPTBN2	11	259	109785	815021	1.20322e-05	0.315296	0.213969
SPTBN1	0	229	109796	815051	4.06039e-13	0	7.22059e-09
ZNF814	19	48	109777	815232	0.000211986	2.93956	1
RNF175	7	24	109789	815256	0.0871036	2.16582	1
KLF11	7	52	109789	815228	1	0.999564	1
KLF10	2	32	109794	815248	0.424966	0.464078	1
KLF17	6	34	109790	815246	0.467827	1.31038	1
KLF16	2	47	109794	815233	0.118619	0.315962	1
KLF15	1	38	109795	815242	0.0812942	0.195398	1
KLF14	4	38	109792	815242	0.813103	0.781622	1
TFAP2A	2	37	109794	815243	0.316425	0.401362	1
TFAP2C	1	47	109795	815233	0.0401554	0.15798	1
TFAP2B	3	34	109793	815246	0.61722	0.655174	1
TFAP2E	8	53	109788	815227	0.693417	1.1208	1
TFAP2D	5	43	109791	815237	1	0.863389	1
MDFI	2	26	109794	815254	0.767292	0.571178	1
ZNF728	8	24	109788	815256	0.0476751	2.47516	1
ACP7	7	41	109789	815239	0.504845	1.26777	1
GBE1	9	40	109787	815240	0.179932	1.67076	1
RIMKLB	0	27	109796	815253	0.067403	0	1
OR51T1	4	26	109792	815254	0.775998	1.14236	1
RP11-14J7.7	0	5	109796	815275	1	0	1
NRROS	4	66	109792	815214	0.137528	0.450005	1
PCNA	0	4	109796	815276	1	0	1
SLC44A1	3	37	109793	815243	0.621916	0.60205	1
C15orf41	3	21	109793	815259	0.75869	1.06079	1
SLC44A3	14	51	109782	815229	0.031726	2.03851	1
ZBTB7A	0	82	109796	815198	5.04555e-05	0	0.89725
SLC44A5	6	45	109790	815235	1	0.990054	1
ZBTB7C	6	69	109790	815211	0.373348	0.645669	1
ZBTB7B	2	49	109794	815231	0.0838863	0.303065	1
MSI2	1	45	109795	815235	0.0383157	0.165002	1
MSI1	0	43	109796	815237	0.00781786	0	1
SYNGR1	1	39	109795	815241	0.082502	0.190388	1
PCNP	0	12	109796	815268	0.382354	0	1
ZNF334	20	38	109776	815242	6.13231e-06	3.90824	0.109051
MRPL38	3	31	109793	815249	0.792117	0.718581	1
DEFB128	0	6	109796	815274	1	0	1
MIDN	0	87	109796	815193	3.48846e-05	0	0.620354
CYYR1	1	17	109795	815263	0.714515	0.436783	1
CRABP1	2	14	109794	815266	1	1.06079	1
ZMYND8	1	93	109795	815187	0.000169413	0.0798348	1
THBS1	6	94	109790	815186	0.0865409	0.473934	1
PACRG	7	26	109789	815254	0.104295	1.99926	1
FAM149A	9	82	109787	815198	0.744841	0.814989	1
KLK1	8	26	109788	815254	0.0556874	2.28473	1
TOP3A	13	61	109783	815219	0.147143	1.58252	1
DNPH1	7	18	109789	815262	0.0229752	2.88778	1
ZFHX4	13	266	109783	815014	5.74969e-05	0.36282	1
ADNP2	8	109	109788	815171	0.113904	0.544952	1
RPA3	1	1	109795	815279	0.22329	7.4259	1
RPA2	6	13	109790	815267	0.0192278	3.42692	1
NDUFS1	7	45	109789	815235	0.668309	1.15506	1
NDUFS2	4	25	109792	815255	0.771248	1.18807	1
NDUFS3	0	21	109796	815259	0.165188	0	1
NDUFS4	6	16	109790	815264	0.038819	2.78462	1
NDUFS5	3	10	109793	815270	0.19399	2.22765	1
NDUFS6	2	13	109794	815267	0.696393	1.14236	1
ISY1-RAB43	0	3	109796	815277	1	0	1
NDUFS8	3	20	109793	815260	0.749009	1.11378	1
COQ4	4	28	109792	815252	0.787448	1.06079	1
COQ7	3	20	109793	815260	0.749009	1.11378	1
COQ6	6	28	109790	815252	0.286317	1.59118	1
UFD1L	1	21	109795	815259	0.506512	0.353585	1
COQ3	3	26	109793	815254	1	0.856747	1
ILF2	0	16	109796	815264	0.245134	0	1
FAM198A	9	53	109787	815227	0.553071	1.26094	1
RP4-576H24.4	3	16	109793	815264	0.486797	1.39227	1
FAM198B	11	30	109785	815250	0.00692242	2.72282	1
ZRANB1	2	43	109794	815237	0.164277	0.345356	1
KLK6	1	21	109795	815259	0.506512	0.353585	1
ZRANB3	22	65	109774	815215	0.00063749	2.51336	1
ZRANB2	3	23	109793	815257	1	0.968529	1
[truncated: 15,786 more rows]
